# Molecular phylogenetics of subfamily Ornithogaloideae (Hyacinthaceae) based on nuclear and plastid DNA regions, including a new taxonomic arrangement

Mario Martínez-Azorín<sup>1,\*</sup>, Manuel B. Crespo<sup>1</sup>, Ana Juan<sup>1</sup> and Michael F. Fay<sup>2</sup>

<sup>1</sup>CIBIO (Instituto Universitario de la Biodiversidad), Universidad de Alicante, PO Box 99, E-03080 Alicante, Spain and

<sup>2</sup>Jodrell Laboratory, Royal Botanic Gardens, Kew, Richmond, Surrey TW9 3DS, UK

\* For correspondence. E-mail [mmartinez@ua.es](mailto:mmartinez@ua.es)

Received: 16 March 2010 Returned for revision: 28 June 2010 Accepted: 13 September 2010

• **Background and Aims** The taxonomic arrangement within subfamily Ornithogaloideae (Hyacinthaceae) has been a matter of controversy in recent decades: several new taxonomic treatments have been proposed, based exclusively on plastid DNA sequences, and these have resulted in classifications which are to a great extent contradictory. Some authors have recognized only a single genus *Ornithogalum* for the whole subfamily, including 250–300 species of variable morphology, whereas others have recognized many genera. In the latter case, the genera are inevitably much smaller and they are better defined morphologically. However, some are not monophyletic as circumscribed.

• **Methods** Phylogenetic analyses of Ornithogaloideae were based on nucleotide sequences of four plastid regions (*trnL* intron, *trnL-F* spacer, *rbcL* and *matK*) and a nuclear region (ITS). Eighty species covering all relevant taxonomic groups previously recognized in the subfamily were sampled. Parsimony and Bayesian analyses were performed. The molecular data were compared with a matrix of 34 morphological characters.

• **Key Results** Combinations of plastid and nuclear data yielded phylogenetic trees which are better resolved than those obtained with any plastid region alone or plastid regions in combination. Three main clades are found, corresponding to the previously recognized tribes *Albuceae*, *Dipcadieae* and *Ornithogaleae*. In these, up to 19 clades are described which are definable by morphology and biogeography. These mostly correspond to previously described taxa, though some need recircumscription. Morphological characters are assessed for their diagnostic value for taxonomy in the subfamily.

• **Conclusions** On the basis of the phylogenetic analyses, 19 monophyletic genera are accepted within Ornithogaloideae: *Albuca*, *Avonsera*, *Battandiera*, *Cathissa*, *Coilonox*, *Dipcadi*, *Eliokarmos*, *Elsiea*, *Ethesia*, *Galtonia*, *Honorius*, *Loncomelos*, *Melomphis*, *Neopatersonia*, *Nicipe*, *Ornithogalum*, *Pseudogaltonia*, *Stellarioides* and *Trimelopter*. Each of these has a particular syndrome of morphological characters. As a result, 105 new combinations are made and two new names are proposed to accommodate the taxa studied in the new arrangement. A short morphological diagnosis, synonymy, details of distribution and an identification key are presented.

**Key words:** Ornithogaloideae, Hyacinthaceae, Asparagaceae, Scilloideae, molecular systematics, taxonomy.

## INTRODUCTION

Hyacinthaceae include about 700–900 species of bulbous plants which are mainly distributed through Europe, Africa and south-west Asia, with a single small genus in South America (APG II, 2002). Following the molecular studies of Pfosser and Speta (1999) and Manning *et al.* (2004), four monophyletic subfamilies can be clearly recognized within Hyacinthaceae: Hyacinthoideae, Ornithogaloideae, Urgineoideae and Oziroëoideae. Alternatively, Hyacinthaceae can be treated as subfamily Scilloideae of Asparagaceae, and the subfamilies above are then treated as tribes Hyacintheae, Ornithogaleae, Oziroëae and Urgineae (e.g. APG III, 2009; Chase *et al.*, 2009). Hyacinthaceae are monophyletic within Asparagaceae (*sensu lato*), and here the former system is followed (although M.F.F. prefers the latter).

Ornithogaloideae are distributed through Europe, south-west Asia and Africa and include about 280 species (Speta, 1998a). The definition of genera and the assignment of species to

genera within this subfamily have troubled taxonomists since Linnaeus (Stedje, 2001a, b), and there has been a great controversy concerning generic treatments. At least three taxonomic arrangements at generic level have been proposed within Ornithogaloideae in recent times (Speta, 1998a; Manning *et al.*, 2004, 2009a), all based exclusively on plastid DNA regions. Furthermore, those proposals are to a great extent contradictory.

Speta (1998a) in a study of Ornithogaloideae recognized 13 genera: *Stellarioides* Medik., *Coilonox* Raf., *Albuca* L., *Pseudogaltonia* Kuntze, *Dipcadi* Medik., *Galtonia* Decne., *Zahariadia* Speta, *Melomphis* Raf., *Cathissa* Salisb., *Eliokarmos* Raf., *Loncomelos* Raf., *Honorius* Gray and *Ornithogalum* L. He also considered *Neopatersonia* Schönland as a possible member of the subfamily. However, Pfosser and Speta (1999) in a phylogenetic analysis based on 30 species and one plastid DNA region (*trnL-F*) showed that some of the genera recognized by Speta (1998a) were polyphyletic.

Manning *et al.* (2004) extended the phylogenetic study to 40 taxa within *Ornithogaloideae* and a second plastid DNA region (*rbcL*) was added. These authors opted for accepting just a single genus, *Ornithogalum*, in *Ornithogaloideae*, thus expanding *Ornithogalum* to include *Albuca*, *Dipcadi*, *Galtonia*, *Neopaterosonia* and *Pseudogaltonia*, together with the other genera accepted by Speta (1998a). This treatment was justified by the complete collapse at the base of the phylogenetic tree, and the apparent lack of monophyly of these genera as previously circumscribed.

This recognition of *Ornithogalum* (*sensu lato*) proved to be somewhat unpopular (e.g. Van Jaarsveld *et al.*, 2007; Manning *et al.*, 2009a), and recently Manning *et al.* (2009a) continued the study of the generic circumscription in *Ornithogaloideae*. They added a third plastid region (*matK*) and extended their previous study to 70 species (Manning *et al.*, 2009a), obtaining higher resolution by combining sequences from the different plastid regions, as previously suggested for other groups by for instance Barfuss *et al.* (2005). Manning *et al.* (2009a) obtained a combined tree with four strongly supported main clades. They discussed extensively three possible taxonomic arrangements in *Ornithogaloideae* on the basis of their plastid molecular data, and finally favoured three tribes (Albuceae, Dipcadiaceae and *Ornithogaleae*), with only four genera (*Dipcadi*, *Pseudogaltonia*, *Ornithogalum* and *Albuca*). Among these, *Ornithogalum* and *Albuca* were still defined in a broad sense and, as a result, are highly heterogeneous in morphology. Both genera were, however, divided into many subgenera, sections and series, some of which were monophyletic and well characterized from a morphological point of view.

Plastid sequences have constituted an important source of characters for the phylogenetic reconstruction in plant groups (Palmer *et al.*, 1988; Clegg and Zurawski, 1992; Cameron, 2004). However, due to the cytoplasmic inheritance of that DNA, it can have a tendency to show significant errors due to hybridization, introgression or irregular distribution of lineages (Rieseberg and Soltis, 1991; Doyle, 1992). Fortunately, these problems may to some degree be identified by comparing phylogenetic trees from plastid and nuclear DNA sequences (Smith and Sytsma, 1990; Rieseberg, 1991; Wendel *et al.*, 1991; Peterson *et al.*, 2004, 2009; Alzate *et al.*, 2009; Zarrei *et al.*, 2009), and by checking the relationships among the species (Sytsma and Schaal, 1985; Rieseberg *et al.*, 1988; Wallace and Jansen, 1990). As the combination of *trnL-F*, *rbcL* and *atpB* plastid sequences has been relatively unfruitful in resolving taxonomic questions in *Hyacinthaceae* (Lebatha *et al.*, 2006), the nuclear ribosomal ITS region appears to be a good candidate, though few data have been generated for this family to date (cf. Pires and Sytsma, 2002). The presence of multiple alleles has been detected (Pfosser in Lebatha *et al.*, 2006), making sequencing difficult. Moreover, Herrmann (2002) pointed out that the ITS region is not a useful molecular marker with which to study the phylogenetics of *Ornithogalum*, due to difficulties in amplification.

The aims of the present contribution are: (a) to explore phylogenetic relationships in *Ornithogaloideae* by combining plastid (*rbcL*, *trnL-F* and *matK*) and nuclear (ITS) DNA sequences; (b) to evaluate generic limits and circumscriptions after consideration of molecular data, morphological traits and/

or biogeographical distribution of each group obtained; and (c) to generate and justify a new taxonomic arrangement with regard to other options discussed by previous authors.

## MATERIALS AND METHODS

### Taxon sampling

Eighty ingroup taxa were selected, including representatives from all previously recognized taxonomic groups in *Ornithogaloideae* [Table 1; acronyms of herbaria follow Thiers (2009), whereas plant names and authorities follow IPNI (2010)], which cover the full range of morphological and taxonomic variation. With regard to previous studies (Manning *et al.*, 2009a), sampling has been extended by nine taxa, mostly corresponding to Eurasian and north African representatives of *Ornithogalum sensu stricto*. Nearly 25 % of the total accepted species for the subfamily are included in the present study. Five taxa from other subfamilies of *Hyacinthaceae* were chosen as outgroups: *Bowiea volubilis* Harv. ex Hook.f. and *Rhadamanthus convallarioides* Salisb. (both *Urgineoideae*), *Massonia echinata* L.f. and *Muscari neglectum* Guss. ex Ten. (both *Hyacinthoideae*) and *Oziroë biflora* (Ruiz & Pav.) Speta (*Oziroëoideae*) (Table 1).

### Laboratory procedures

Total genomic DNA was extracted from fresh or silica-gel dried material using the 2× CTAB method of Doyle and Doyle (1987) with minor modifications. Total DNA was purified by MOBIO minicolumns and mostly kept in 0.1× TE buffer (10 mM Tris-HCl, 1 mM EDTA, pH 8.0). Some samples were purified on CsCl<sub>2</sub>/ethidium bromide (1.55 g mL<sup>-1</sup>) density gradients (Creeth and Denborough, 1970).

Some samples, especially those from southern Africa, were obtained from the DNA banks of the Royal Botanic Gardens, Kew ([www.rbgekew.org.uk/data/dnaBank/homepage.html](http://www.rbgekew.org.uk/data/dnaBank/homepage.html)) and National Botanic Gardens, Kirstenbosch (NBG) ([www.nbi.ac.za/frames/researchfram.htm](http://www.nbi.ac.za/frames/researchfram.htm)) (Table 1). The DNA for the remainder of samples was isolated and deposited at the DNA banks of Alicante University and the Royal Botanic Gardens, Kew (Table 1).

The *trnL* intron and *trnL-F* spacer (the *trnL-F* region; hereafter *trnL-F*) were amplified, mostly in one piece, using primers c and f (Taberlet *et al.*, 1991), though some taxa required the use of the internal primers d and e (Taberlet *et al.*, 1991). Amplification of the *rbcL* gene was performed using the primers 1F and 1360R, though some taxa required the use of internal primers, 427F and 724R (Lledó *et al.*, 1998). ITS was amplified using the 18Z and AB102 primers (Douzery *et al.*, 1999; Pires, 2000). When the sequences were not obtained in one reaction, the internal primers ITS2 and ITS3 (White *et al.*, 1990) were also used.

A total volume of 25 µL was used in the PCR amplification process as follows: 21 µL of Abgene PCR mastermix (1.25 U Thermoprime Plus DNA polymerase, 75 mM Tris-HCl, 20 mM (NH<sub>4</sub>)<sub>2</sub>SO<sub>4</sub>, 2.5 mM MgCl<sub>2</sub>, 0.01 % Tween<sup>®</sup> 20, 0.2 mM each dNTP); 0.5 µL of bovine serum albumin (BSA; 0.4 %); 10 mM of each primer; 0.5 µL of water; and approx. 40 ng of DNA template. The ITS amplifications were done using

TABLE 1. Samples included in the phylogenetic analyses of the *Hyacinthaceae*, mainly the subfamily *Ornithogaloideae*

| DNA bank code | Species                                                          | Locality                                                            | Voucher                                         |
|---------------|------------------------------------------------------------------|---------------------------------------------------------------------|-------------------------------------------------|
| K 1784        | <i>Albuca abyssinica</i> Jacq.                                   | South Africa, 20 km E of Nelspruit                                  | Manning 2687 (NBG), Chase 1784 (K)              |
| LH 504        | <i>Albuca amboensis</i> (Schinz) Oberm.                          | Botswana                                                            | Beaumont 568 (NBG)                              |
| K 1845        | <i>Albuca aff. chaetopoda</i> Chiov.                             | ex hort., Kew 1981–1086                                             | Chase 1845 (K)                                  |
| K 24814       | <i>Albuca cooperi</i> Baker                                      | South Africa, Namaqualand, Knersvlakte, Douse-the-Glim              | Chase 24814 (K)                                 |
| K 8252        | <i>Albuca fragrans</i> Jacq.                                     | South Africa, Darling                                               | Manning 2184 (NBG)                              |
| K 12563       | <i>Albuca glandulosa</i> Baker                                   | Without locality                                                    | Goldblatt & Manning 11528 (NBG)                 |
| K 1776        | <i>Albuca pendula</i> B.Mathew                                   | ex hort., Kew 1991–846                                              | Chase 1776 (K)                                  |
| K 8253        | <i>Albuca rupestris</i> Hilliard & B.L.Burt                      | South Africa, KwaZulu-Natal, near Bulmer                            | Not found (K)                                   |
| K 12514       | <i>Albuca setosa</i> Jacq.                                       | South Africa, Kaapmuiden                                            | Manning 2689 (NBG)                              |
| K 1012        | <i>Albuca shawii</i> Baker                                       | ex hort., Kew 1983–8300                                             | Chase 1012 (K)                                  |
| K 1736        | <i>Albuca tortuosa</i> Baker                                     | ex hort., Kew 1993–1849                                             | Chase 1736 (K)                                  |
| K 1843        | <i>Albuca wakefieldii</i> Baker                                  | ex hort., Kew 1977–5233                                             | Chase 1843 (K)                                  |
| LH s.n.       | <i>Avonsera convallarioides</i> (H.Perrier) Speta                | Madagascar, Ankarafantsika Plateau                                  | Lavranos s.n. (NBG)                             |
| ABH 416       | <i>Battandiera amoena</i> (Batt.) Maire                          | Morocco, Erfoud, antes del puesto de fósiles                        | SALA 135875                                     |
| LH 1493       | <i>Battandiera pulchra</i> (Schinz) Mart.-Azorín,                | Namibia, Windhoek                                                   | Mannheimer CM2506 (NBG, WIND)                   |
| K 26930       | M.B.Crespo & Juan                                                |                                                                     |                                                 |
| LH 819        | <i>Battandiera seineri</i> (Engl. & Krause) Mart.-Azorín,        | South Africa, Kgalagadi Transfrontier Park                          | Snijman s.n. (no voucher)                       |
|               | M.B.Crespo & Juan                                                |                                                                     |                                                 |
| LH 138        | <i>Battandiera stapffii</i> (Schinz) Mart.-Azorín,               | Namibia, Farm Keitzaub                                              | Mannheimer 1747 (WIND)                          |
| K 28300       | M.B.Crespo & Juan                                                |                                                                     |                                                 |
| K 176         | <i>Bowiea volubilis</i> Harv. ex Hook.f.                         | Without locality                                                    | Chase 176 (NCU, K)                              |
| ABH 233       | <i>Cathissa cocinna</i> (Salisb.) Speta                          | Spain, Zamora, Torregamones                                         | ABH 47140                                       |
| ABH 206       | <i>Cathissa reverchonii</i> (Lange ex Willk.) Speta              | Spain, Cádiz, Grazalema, Tajo de los Pajaritos                      | ABH 47138                                       |
| K 20985       |                                                                  |                                                                     |                                                 |
| ABH 208       | <i>Cathissa unifolia</i> (L.) Mart.-Azorín, M.B.Crespo &         | Spain, Huelva, La Nava                                              | ABH 50131                                       |
| K 20987       | Juan                                                             |                                                                     |                                                 |
| K 12561       | <i>Coilonox concordianum</i> (Baker) Speta                       | South Africa, Loeriesfontein                                        | Goldblatt, Manning & Savolainen 11527 (MO, NBG) |
| K 12520       | <i>Coilonox polyphyllum</i> (Jacq.) Speta                        | South Africa, Namaqualand, Grootvlei                                | Goldblatt, Manning & Savolainen 11510 (MO, NBG) |
| LH 626        | <i>Coilonox secundum</i> (Jacq.) Speta                           | South Africa                                                        | Manning s.n. (no voucher)                       |
| K 12499       | <i>Coilonox suaveolens</i> (Jacq.) Speta                         | South Africa, Anenous Flats                                         | Goldblatt, Manning & Savolainen 11493 (NBG)     |
| K 1783        | <i>Dipcadi filifolium</i> Baker                                  | Yemen, North Yemen, NW side of Jebel Thallanlan, above Hadia Raymah | Chase 1783 (K)                                  |
| LH 197        | <i>Dipcadi glaucum</i> (Burch. ex Kew Gawl.) Baker               | South Africa, 42 km NE from Strydenburg                             | Manning 2237 (NBG)                              |
| K 26640       |                                                                  |                                                                     |                                                 |
| LH 345        | <i>Dipcadi gracillimum</i> Baker                                 | South Africa, 20 km N from Amsterdam                                | Manning 2682 (NBG)                              |
| K 26740       |                                                                  |                                                                     |                                                 |
| K 16972       | <i>Dipcadi longifolium</i> (Ker Gawl.) Baker                     | Malawi, Mulanje                                                     | Chase 16972 (K)                                 |
| K 1824        | <i>Dipcadi serotinum</i> (L.) Medik.                             | Portugal, between Ourique and Castro Verde                          | Chase 1824 (K)                                  |
| K 8254        | <i>Dipcadi viride</i> (L.) Moench                                | South Africa, Inchange                                              | Manning s.n. (no voucher)                       |
| LH 195        | <i>Eliokarmos bicomutus</i> (F.M.Leight.) Mart.-Azorín,          | South Africa, Ratelport N de Springbok                              | Goldblatt & Manning 11503 (NBG)                 |
|               | M.B.Crespo & Juan                                                |                                                                     |                                                 |
| LH 3043       | <i>Eliokarmos ceresianus</i> (F.M.Leight.) Mart.-Azorín,         | South Africa, Ceres                                                 | ABH 49975                                       |
|               | M.B.Crespo & Juan                                                |                                                                     |                                                 |
| ABH 267       | <i>Eliokarmos conicus</i> (Jacq.) Mart.-Azorín, M.B.Crespo       | South Africa, Cape Peninsula, Camps Bay                             | Manning 2993 (NBG)                              |
|               | & Juan                                                           |                                                                     |                                                 |
| LH 375        | <i>Eliokarmos constrictus</i> (F.M.Leight.) Mart.-Azorín,        | South Africa, Addo                                                  | Manning s.n. (NBG)                              |
| K 26763       | M.B.Crespo & Juan                                                |                                                                     |                                                 |
| LH 3054       | <i>Eliokarmos corticatus</i> (Mart.-Azorín) Mart.-Azorín,        | South Africa, Northern Cape, Sutherland,                            | ABH 51609; Martínez-Azorín &                    |
|               | M.B.Crespo & Juan                                                | Klein Roggeveld                                                     | Manning 96 (K, MO, NBG)                         |
| LH 3045       | <i>Eliokarmos dubius</i> (Houtt.) Mart.-Azorín, M.B.Crespo       | South Africa, Hottentots Kloof                                      | Martínez-Azorín & Manning 6 (NBG)               |
|               | & Juan <i>sensu stricto</i>                                      |                                                                     |                                                 |
| LH 3046       | <i>Eliokarmos dubius</i> (= <i>Ornithogalum fimbrimarginatum</i> | South Africa, Hottentots Kloof                                      | Martínez-Azorín & Manning 8 (NBG)               |
|               | F.M.Leight.)                                                     |                                                                     |                                                 |
| K 12467       | <i>Eliokarmos neomaculatus</i> Mart.-Azorín, M.B.Crespo          | South Africa, Nieuwoudtville                                        | Manning s.n. (no voucher)                       |
|               | & Juan                                                           |                                                                     |                                                 |
| LH 349        | <i>Eliokarmos pilosus</i> (Jacq.) Mart.-Azorín, M.B.Crespo       | South Africa, Gordon's Bay                                          | Manning 2696 (NBG)                              |
| K 26743       | & Juan                                                           |                                                                     |                                                 |
| LH 156        | <i>Eliokarmos pruinosis</i> (F.M.Leight.) Mart.-Azorín,          | South Africa, Loeriesfontein                                        | Goldblatt, Manning & Savolainen 11526           |
| K 26605       | M.B.Crespo & Juan                                                |                                                                     | (NBG)                                           |
| LH s.n.       | <i>Eliokarmos rupestris</i> (L.f.) Mart.-Azorín, M.B.Crespo      | South Africa, Langebaan                                             | Manning s.n. (no voucher)                       |
|               | & Juan                                                           |                                                                     |                                                 |
| LH 3044       | <i>Eliokarmos strictus</i> (L.Bolus) Mart.-Azorín,               | South Africa, Cape, near Ceres                                      | ABH 49977; Manning &                            |
|               | M.B.Crespo & Juan                                                |                                                                     | Martínez-Azorín 3 (NBG)                         |

Continued



TABLE 1. *Continued*

| DNA bank code                 | Species                                                                                                                                                                   | Locality                                                                                  | Voucher                                                               |
|-------------------------------|---------------------------------------------------------------------------------------------------------------------------------------------------------------------------|-------------------------------------------------------------------------------------------|-----------------------------------------------------------------------|
| LH 3042                       | <i>Eliokarmos thyrsoides</i> (Jacq.) Raf.                                                                                                                                 | South Africa, Western Cape, Elandskloof Farm                                              | ABH 50035; Martínez-Azorín & Manning 13 (NBG)                         |
| LH 1464<br>K 28846            | <i>Elsiea corymbosa</i> F.M.Leight.                                                                                                                                       | South Africa, Worcester, Milner Peak                                                      | Helme 2850 (NBG)                                                      |
| LH 1824<br>K 28638<br>K 12466 | <i>Ethesia haalenbergensis</i> (U.Müll.-Doblies & D.Müll.-Doblies) Mart.-Azorín, M.B.Crespo & Juan<br><i>Ethesia xanthochlora</i> (Baker) Mart.-Azorín, M.B.Crespo & Juan | Namibia, Klinghadsberge<br>South Africa, foot of Anenus Pass                              | Mannheimer 2443 (WIND)<br>Goldblatt, Manning & Savolainen 11491 (NBG) |
| K 2024                        | <i>Galtonia candicans</i> (Baker) Decne.                                                                                                                                  | South Africa, ex hort. Kew 1969–19589                                                     | Chase 2024 (K)                                                        |
| ABH 175                       | <i>Galtonia saundersiae</i> (Baker) Mart.-Azorín, M.B.Crespo & Juan                                                                                                       | South Africa, in culture                                                                  | ABH 50132                                                             |
| K 17517                       | <i>Galtonia viridiflora</i> Verdoorn                                                                                                                                      | Lesotho, Blue Mtn. Pass                                                                   | Chase 17517 (K)                                                       |
| ABH 381                       | <i>Honorius nutans</i> (L.) Gray                                                                                                                                          | Commercial origin, Kew Gardens                                                            | Martínez-Azorín s.n. (no voucher)                                     |
| ABH 211<br>K 20990            | <i>Loncomelos narbonense</i> (L.) Speta                                                                                                                                   | Spain, Alicante, Benissa                                                                  | ABH 50146                                                             |
| ABH 203<br>K 20982            | <i>Loncomelos pyrenaicus</i> (L.) L.D.Hrouda ex Holub                                                                                                                     | Spain, Huelva, Puebla de Guzmán                                                           | ABH 50135                                                             |
| K 9182                        | <i>Massonia echinata</i> L.f.                                                                                                                                             | Without locality                                                                          | Goldblatt & Manning 10961 (NBG)                                       |
| ABH 214<br>K 20993            | <i>Melomphis arabica</i> (L.) Raf.                                                                                                                                        | Spain, Cadiz, Tarifa cementery                                                            | ABH 50134                                                             |
| K 3540                        | <i>Muscari neglectum</i> Guss. ex. Ten.                                                                                                                                   | ex hort., Kew 1987–1738                                                                   | Chase 3540 (K)                                                        |
| K 12469                       | <i>Neopaterosonia namaquensis</i> G.J.Lewis                                                                                                                               | South Africa, 40 km S of Springbok                                                        | Goldblatt & Manning 11369 (NBG)                                       |
| K 12519                       | <i>Neopaterosonia rotata</i> (U.Müll.-Doblies & D.Müll.-Doblies) Mart.-Azorín, M.B.Crespo & Juan                                                                          | South Africa, Anenus Flats                                                                | Manning 2275 (NBG)                                                    |
| K 5639                        | <i>Neopaterosonia uitenhagensis</i> Schönland                                                                                                                             | South Africa, lime works near Robertson                                                   | Goldblatt & Manning 10723 (MO, NBG)                                   |
| K 1863                        | <i>Nicipe gracillima</i> (R.E.Fr.) Mart.-Azorín, M.B.Crespo & Juan                                                                                                        | Kenya                                                                                     | Chase 1863 (K)                                                        |
| LH 3056                       | <i>Nicipe graminifolia</i> (Thunb.) Mart.-Azorín, M.B.Crespo & Juan                                                                                                       | South Africa, Western Cape, Hottentots Kloof, near Ceres                                  | ABH 49981; Martínez-Azorín & Manning 7 (NBG)                          |
| LH 377<br>K 26765             | <i>Nicipe juncifolia</i> (Jacq.) Mart.-Azorín, M.B.Crespo & Juan                                                                                                          | South Africa, Grahamstown                                                                 | Manning 2699 (NBG)                                                    |
| LH 377                        | <i>Nicipe paludosa</i> (Baker) Mart.-Azorín, M.B. Crespo & Juan                                                                                                           | South Africa, Witzieshoek                                                                 | Manning 3149 (NBG)                                                    |
| LH 3079                       | <i>Nicipe septonii</i> (Hilliard & B.L.Burt) Mart.-Azorín, M.B.Crespo & Juan                                                                                              | Lesotho, 25 km from Semonkong towards Roma                                                | Snijman 2036 (NBG)                                                    |
| K 1682-B                      | <i>Ornithogalum armeniacum</i> Baker                                                                                                                                      | Turkey, SW of Turkey, Mugla, Koycegiz, Sandras Dag, road from Agla to Gokceova            | Chase 1682.B (K)                                                      |
| ABH 184<br>K 20963            | <i>Ornithogalum baeticum</i> Boiss.                                                                                                                                       | Spain, Cádiz, Grazalema, Llanos del Republicano                                           | ABH 47137                                                             |
| ABH 187<br>K 20966            | <i>Ornithogalum bourgaeum</i> Jord. & Fourr.                                                                                                                              | Spain, Alicante, S <sup>a</sup> Aitana, Font del Arbre                                    | ABH 47142                                                             |
| K 20637                       | <i>Ornithogalum chionophilum</i> Holmboe                                                                                                                                  | Cyprus, Troodos Mts.                                                                      | Not found (K)                                                         |
| ABH 387                       | <i>Ornithogalum kochii</i> Parl.                                                                                                                                          | Slovenia, Istria, Lipica                                                                  | Peruzzi s.n. (no voucher)                                             |
| K 21432                       | <i>Ornithogalum lanceolatum</i> Labill.                                                                                                                                   | Lebanon, road from Beirut to Zambale Dab                                                  | Not found (K)                                                         |
| ABH 228<br>K 31122            | <i>Ornithogalum montanum</i> Ten.                                                                                                                                         | Turkey, División II, Estambul, Prince Islands                                             | ABH 50139                                                             |
| ABH 383<br>K 20631            | <i>Ornithogalum monticulum</i> Jord. & Fourr.<br><i>Ornithogalum oligophyllum</i> E.D.Clarke                                                                              | France, Massif Central, Coiran<br>Greece, Mount Vermion, near to Naussa                   | Peruzzi s.n. (no voucher)<br>Chase 28108 (K)                          |
| ABH 393<br>K 20634            | <i>Ornithogalum orthophyllum</i> Ten.<br><i>Ornithogalum pedicellare</i> Boiss. & Kotschy                                                                                 | Italy, Basilicata, Baltarno<br>Cyprus, Area 4, Ayos Antonios, approx. 1.6 km. E of Sotira | Peruzzi s.n. (no voucher)<br>No voucher                               |
| K 20632                       | <i>Ornithogalum refractum</i> Willd.                                                                                                                                      | Yugoslavia, Macedonia, Mount Sinjaciko                                                    | Chase 20632 (K)                                                       |
| K 20636                       | <i>Ornithogalum sintenisi</i> Freyn                                                                                                                                       | Iran, Elburz Mts. E of Gorgan 13 km S of Aliabad towards Qalieh Now                       | Chase 20636 (K)                                                       |
| K 793                         | <i>Oziroë biflora</i> (Ruiz & Pav.) Speta                                                                                                                                 | ex hort., Kew 1977–2343                                                                   | Chase 793 (K)                                                         |
| K 2255                        | <i>Pseudogaltonia clavata</i> (Mast.) Phillips                                                                                                                            | Namibia, 9 miles E of Windhoek                                                            | Codd sub Chase 2255 (K)                                               |
| K 5951                        | <i>Rhadamanthus convallarioides</i> Salisb.                                                                                                                               | Without locality                                                                          | Goldblatt 10852 A                                                     |
| K 1507                        | <i>Stellarioides longibracteata</i> (Jacq.) Speta                                                                                                                         | South Africa, ex hort. Kew, 1994–2325                                                     | Chase 1507 (K)                                                        |
| K 1846                        | <i>Stellarioides sordida</i> (Baker) Speta                                                                                                                                | ex hort Kew 1981–1010                                                                     | Chase 1846 (K)                                                        |
| LH 344<br>K 26739             | <i>Stellarioides tenuifolia</i> (Redoute) Speta                                                                                                                           | South Africa, Drummond                                                                    | Manning 2667 (NBG)                                                    |
| LH 196<br>K 12516             | <i>Trimelopter etesiogariense</i> (U.Müll.-Doblies & D.Müll.-Doblies) Mart.-Azorín, M.B.Crespo & Juan                                                                     | Namibia, Spitzkop to Rosh Pinah                                                           | Goldblatt & Manning 11352 (NBG)                                       |
| LH 134                        | <i>Trimelopter unifolium</i> (Retz.) Mart.-Azorín, M.B.Crespo & Juan                                                                                                      | South Africa, Pieter Meintjies Siding                                                     | Manning 2270b (NBG)                                                   |

Abbreviations: ABH: University of Alicante, Spain; K: Royal Botanic Gardens, Kew, UK; MO: Missouri Botanical Garden, USA; NBG: Compton Herbarium, Kirstenbosch, South Africa; SALA: University of Salamanca, Spain; WIND: National Botanical Research Institute, Windhoek, Namibia. GenBank accession numbers are given in Supplementary Data Table S3, available online.

1.5 mM MgCl<sub>2</sub> Abgene PCR mastermix and 1 µL of dimethyl sulphoxide (DMSO). Amplifications were performed on a 9700 GeneAmp thermocycler (Applied Biosystems), with the following programme: 4 min at 94 °C, followed by 28 cycles of 94 °C for 1 min, 48 °C for 30 s for *rbcL*, or 50 °C for 1 min for *trnL-F*, 72 °C for 1 min, and a final extension 72 °C for 7 min. For ITS, a touchdown programme was used with a initial 94 °C for 5 min, following by 12 cycles of 94 °C for 30 s, 59 °C for 1 min decreasing 1 °C in each cycle plus 18 cycles at 48 °C for 1 min, 72 °C 1 min, and a final extension 72 °C for 7 min. PCR products were purified with MOBIO minicolumns following the manufacturer's protocol. Sequencing data were obtained using ABI Prism Big Dye Terminator Cycle Sequencing Kits (Applied Biosystems) and run on an ABI 3700 Genetic Analyser according to manufacturer's protocols.

All ITS sequences are original (Table 1), whereas some of those for *trnL-F* and *rbcL* (mostly from southern African taxa) and the *matK* matrix were obtained from John Manning (South African National Biodiversity Institute, Kirstenbosch) and Félix Forest (Royal Botanic Gardens, Kew). The plastid (except *matK*) sequences of the Eurasian species are all original. All new sequences were deposited in GenBank (see Table 1).

#### Data analyses

Sequencer 4.1 (Gene Codes Corp., Ann Arbor, MI, USA) was used to assemble complementary strands and verify software base-calling. All DNA regions were aligned by eye in PAUP version 4.0b10 (Swofford, 2002). Maximum parsimony (MP) trees were obtained from the resulting matrices using heuristic search options, using PAUP. Searches included 1000 random addition replicates and tree-bisection-reconnection (TBR) branch swapping, with MULTREES in effect (keeping multiple most-parsimonious trees). All characters had equal weight. Gaps were treated as missing. The shortest trees held in the initial heuristic search were used as initial trees for a final heuristic analysis, using all the cited options. MP support was assessed using 1000 bootstrap (BS) replicates, TBR branch swapping, simple addition sequence and MULTREES on, but keeping only ten trees per replicate following Salamin et al. (2003). Clades with BS values of 50–74 % were described as weakly supported, 75–89 % moderately supported and 90–100 % strongly supported.

A Bayesian analysis was conducted with MrBayes 3.1 (Ronquist and Huelsenbeck, 2003). The software MrModeltest (ver. 2; Nylander, 2004) was used to determine the best model of DNA substitution for each partition, using the Akaike Information Criterion (Akaike, 1974). The Markov Chain Monte Carlo chains were run for  $1 \times 10^6$  generations and sampled every 100 generations. The chains reached stationarity and the average standard deviation of the split frequencies stabilized in <250 000 generations. Thus the first 750 trees were excluded ('burn-in') and the remaining trees were used to compile a posterior probability (PP) distribution using a 50 % majority-rule consensus. One of these remaining trees was drawn using PAUP software. Clades with PP equal to or higher than 0.95 are regarded as strongly supported.

The MP analyses were performed using all five outgroup taxa, which in all cases were external to the fully supported, monophyletic ingroup. In the Bayesian approaches only one outgroup taxon (*Bowiea volubilis*) was included.

Evaluation of morphological character state distribution patterns were mapped on the Bayesian tree using MacClade version 4.08 (Maddison and Maddison, 2005) with the default settings. Thirty-four characters (Tables S1 and S2 in Supplementary data, available online) were traced using ACCTRAN optimization and assuming Fitch parsimony, equal weighting of all characters, transitions among all states equally probable, and characters as unordered. Character states were determined from literature and personal observation.

## RESULTS

#### Plastid trees

Combination of all three plastid DNA regions (*rbcL*, *matK* and *trnL-F*) generated a matrix of 3382 characters. Of these, 754 were variable and 341 (45.2 %) were potentially phylogenetically informative. A total of 7100 MP trees was obtained [1243 steps, consistency index (CI) = 0.70, retention index (RI) = 0.82]. Bayesian analysis yielded trees based on a General Time Reversible + Gamma + Proportion invariant distribution (GTR + I + G) with topologies that are consistent with those retrieved with the MP analysis. These data yielded trees (not shown) fully congruent with those obtained by Manning et al. (2009a).

#### ITS trees

Amplification of the ITS region was successful for most species and yielded useful data for phylogenetic studies in *Ornithogaloideae*. However, it was not possible to sequence *Pseudogaltonia*, the position of which is thus unknown. The ITS matrix contained 959 characters, of which 500 were variable and 337 (67.4 %) were potentially phylogenetically informative.

A total of 5590 MP trees was obtained (1539 steps, CI = 0.52, RI = 0.76). The topology of the parsimony strict consensus tree (not shown) is similar to the Bayesian tree. Therefore, only one of the post-burn-in trees obtained from a Bayesian analysis under the GTR + I + G model is shown (Fig. 1). Bayesian PP and parsimony BS values are well correlated, the Bayesian being consistently higher (Fig. 1).

Several main clades can be distinguished (Fig. 1). One formed by *Neopaterosonia* plus *O. rotatum* U. Müll.-Doblies & D. Müll.-Doblies (0.97 PP; 99 % BS) is sister to a large clade including the remainder of the subfamily (0.97 PP; 56 % BS).

Successively sister groups appear in that large group. First, there is a well-supported clade (1.00 PP; 93 % BS) that can be divided into two subclades. One (1.00 PP; 80 % BS) comprises the *Dipcadi* clade (0.99 PP; 76 % BS) sister to the *Battandiera* clade (0.89 PP; 77 % BS). The other (0.87 PP; 68 % BS) includes *Stellarioides*, *Trimelopter*, *Albuca* and *Coilonox* species, and is divided into two groups. One includes *Albuca* plus *Coilonox* (1.0 PP; 66 % BS) and shows little

internal resolution, though *Coilonox* (*O. polyphyllum* Jacq.-*O. suaveolens* Jacq.) appears as a clade (1.00 PP; 60 % BS). The other comprises *Stellarioides* plus *Trimelopter* (0.80 PP; 53 % BS), in which the monophyly of both subclades is strongly supported (1.00 PP, 98 % BS and 1.00 PP, 100 % BS, respectively).

Secondly, a large clade not fully resolved includes two subclades. The first one includes the Madagascan endemic *O. convallarioides* H.Perrier (= *Avonsera* Speta) and a clade comprising *Eliokarmos*, *Ethesia* and *Galtonia* (1.00 PP; 58 % BS); however, their phylogenetic relationships are not resolved. In this latter clade, two groups are identified. One (0.95 PP; 96 % BS) includes *Galtonia*, *O. saundersiae* (= *Zahariadia* Speta) and two species of *O.* subgenus *Urophyllon* (*sensu Obermeyer, 1978*): *O. haalenbergense* U.Müll.-Doblies & D.Müll.-Doblies and *O. xanthochlorum* Baker (0.95 PP; 96 % BS). The other is highly supported (1.00 PP; 100 % BS) and corresponds to *Eliokarmos* (= *O.* subgenus *Aspasia* groups *Aspasiae* and *Hispidae*, *sensu Obermeyer, 1978*), with several internally well-supported groups. Finally, the second subclade includes all Eurasian and north African taxa of *Ornithogalum* (including *Honorius*, *Loncomelos*, *Melomphis* and *Cathissa*) plus the southern and eastern African *O.* subgenus *Aspasia* group *Angustifoliati* (*sensu Obermeyer, 1978*) that corresponds to *Nicipe* Raf. and *Elsiea* F.M.Leight. This clade is strongly supported (1.00 PP; 95 % BS) though the internal relationships are not fully resolved. Only some clades are well supported, namely those corresponding to *Ornithogalum* plus *Honorius* (1.00 PP; 99 % BS), *Loncomelos* (1.00 PP; 97 % BS) and *Nicipe* (1.00 PP; 81 % BS).

#### Combined trees

Combination of *trnL-F*, *rbcL*, *matK* and ITS regions generated a total matrix with 4242 characters, of which 1198 were variable and 653 (54.5 %) were potentially phylogenetically informative. A total of 1761 MP trees was obtained (2713 steps, CI = 0.58, RI = 0.78). The topology of the parsimony strict consensus tree (not shown) is quite similar to the Bayesian consensus tree obtained under the GTR + I + G model. Phylogenetic relationships are shown by one of the post-burn-in topologies (Fig. 2). Bayesian PP and parsimony BS values are well correlated, the Bayesian being consistently higher (Fig. 2).

The trees in Figs 1 and 2 generally have a similar topology, but clade support is substantially higher in the latter. However, the combined tree (Fig. 2) shows two clades placed in quite different positions compared with the ITS tree (Fig. 1). Firstly, the *Neopatersonia* plus *O. rotatum* clade (1.00 PP; 100 % BS) is in the Bayesian combined tree (Fig. 2) nested within Ornithogaleae (Clade C), sister to the group including the Eurasian and North African species plus *Nicipe* and *Elsiea* (0.98 PP). That clade is, however, placed as sister to the rest of Ornithogaleae in the MP combined tree (not shown), with moderate support (88 % BS). Secondly, the *Trimelopter* clade (*O. unifolium* Retz. plus *O. etesiogaripense* U.Müll.-Doblies & D.Müll.-Doblies) is in the combined tree (by both MP and Bayesian analyses) sister to the clade comprising *Stellarioides*, *Coilonox* and *Albuca*.

Two main clades can be identified in Fig. 2. The first main clade (Clade A + B), which corresponds to Albucaeae plus Dipcadiaceae (*sensu Manning et al., 2009a*), receives moderate support (0.71 PP; 75 % BS) and includes the genera *Pseudogaltonia*, *Dipcadi*, *Battandiera*, *Trimelopter*, *Albuca*, *Coilonox* and *Stellarioides* as recognized here. It can be divided into two subclades. *Pseudogaltonia* and *Dipcadi* species form a strongly supported group (1.0 PP; 94 % BS). In the *Dipcadi* clade, segregation of the Mediterranean *D. serotinum* Medik. from the South African representatives is strongly supported (1.0 PP; 100 % BS). A second clade (1.00 PP; 65 % BS) comprises *Battandiera*, *Trimelopter*, *Stellarioides*, *Albuca* and *Coilonox*. Within that clade, as sister to the rest, is a well-supported group (1.0 PP; 99 % BS) including *O. seineri* (Engl. & K.Krause) Oberm., *O. pulchrum* Schinz, *O. stapffii* Schinz and *O. amoenum* Batt., which are here included in *Battandiera*. The next branch groups *O. etesiogaripense* and *O. unifolium* (*Trimelopter* clade) (1.0 PP; 100 % BS) together, sister to *Albuca*, *Coilonox* and *Stellarioides* (1.0 PP; 88 % BS). The *Stellarioides* species (*O. longibracteatum* Jacq., *O. sordidum* Baker and *O. tenuifolium* Redouté) constitute a fully supported subclade (1.0 PP; 100 % BS), sister to *Albuca* plus *Coilonox* (1.0 PP; 99 % BS). Although *Albuca* was not supported as monophyletic in the heuristic MP analysis, the Bayesian one yielded two fully supported monophyletic groups: *Coilonox* (1.00 PP) and *Albuca* (1.00 PP). In *Albuca* two main clades appear, one of which matches the former *Pallastema* Salisb (0.99 PP; 55 % BS).

The second main clade in the combined tree (Clade C), which corresponds to Ornithogaleae (*sensu Manning et al., 2009a*), is well supported (1.0 PP; 88 % BS). However, relationships of the principal lineages are not well resolved. First, a large clade (1.0 PP; 69 % BS) comprises the species of the here-accepted genera *Galtonia*, *Ethesia* and *Eliokarmos*. Each of these three genera form a well-supported clade. Species of *Galtonia sensu stricto* plus *O. saundersiae* Baker form a strongly supported subclade (1.0 PP; 97 % BS), and therefore we consider all of them as members of *Galtonia*. This group is sister to the one formed by *O. haalenbergense* U.Müll.-Doblies & D.Müll.-Doblies and *O. xanthochlorum* Baker (1.0 PP; 100 % BS), here segregated as *Ethesia*. Sister to these two genera is a strongly supported subclade (1.0 PP; 100 % BS), which we accept as *Eliokarmos*, that includes species of *O.* subgenus *Aspasia* groups *Aspasiae* and *Hispidae* (*sensu Obermeyer, 1978*). Moreover, in *Eliokarmos* two strongly supported subgroups (each one 1.0 PP; 100 % BS) are identified which show morphological peculiarities as discussed below: one comprising *O. maculatum* Jacq. and *O. rupestre* L.f., and the other the rest of the species of *Eliokarmos*.

The position of the Madagascan *O. convallarioides* (= *Avonsera*) is not resolved, as it constitutes a separate clade in an unresolved position in Ornithogaleae. As said before, the *Neopatersonia* clade falls sister to a well-supported third main clade (1.0 PP; 99 % BS) that comprises the rest of representatives from Europe, Middle East and North Africa. This latter clade includes all samples of *Ornithogalum*, *Honorius*, *Loncomelos*, *Melomphis* and *Cathissa*, plus some species from southern and eastern Africa belonging to *Elsiea* and *Nicipe*. Within this wide group, *O. esterhuyseniae*



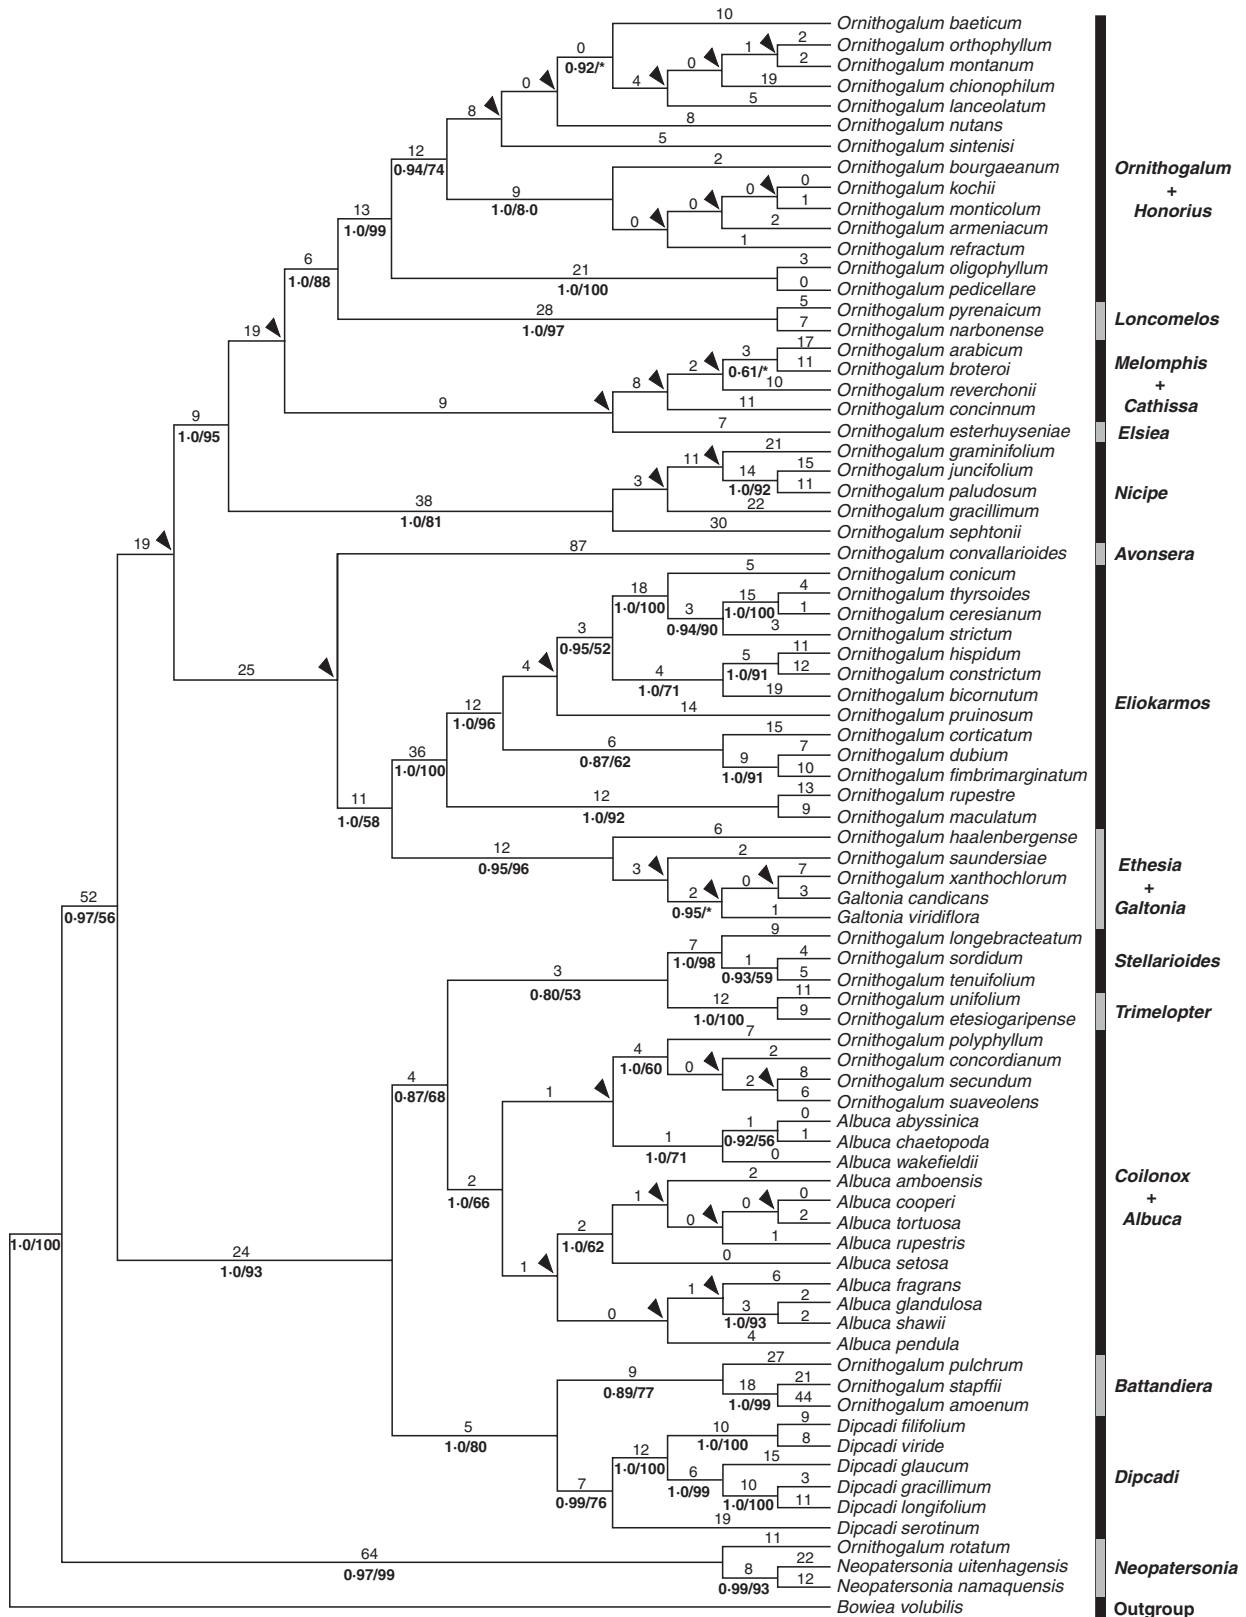

FIG. 1. Bayesian inference analysis obtained from ITS sequences in the phylogenetic analysis of Ornithogaloideae. Phylogenetic relationships shown by one of the post-burn-in topologies. Taxa are identified following the traditional treatment of *Ornithogalum* and other related genera (cf. Obermeyer, 1978; Zahariadi, 1980; Müller-Doblies and Müller-Doblies, 1996). The new proposed generic circumscription of the present study is shown on the right side. Branch lengths are shown above branches, and posterior probabilities and bootstrap percentages are shown below. Arrows indicate branches that collapse in the 50% majority rule consensus tree obtained by Bayesian analysis.

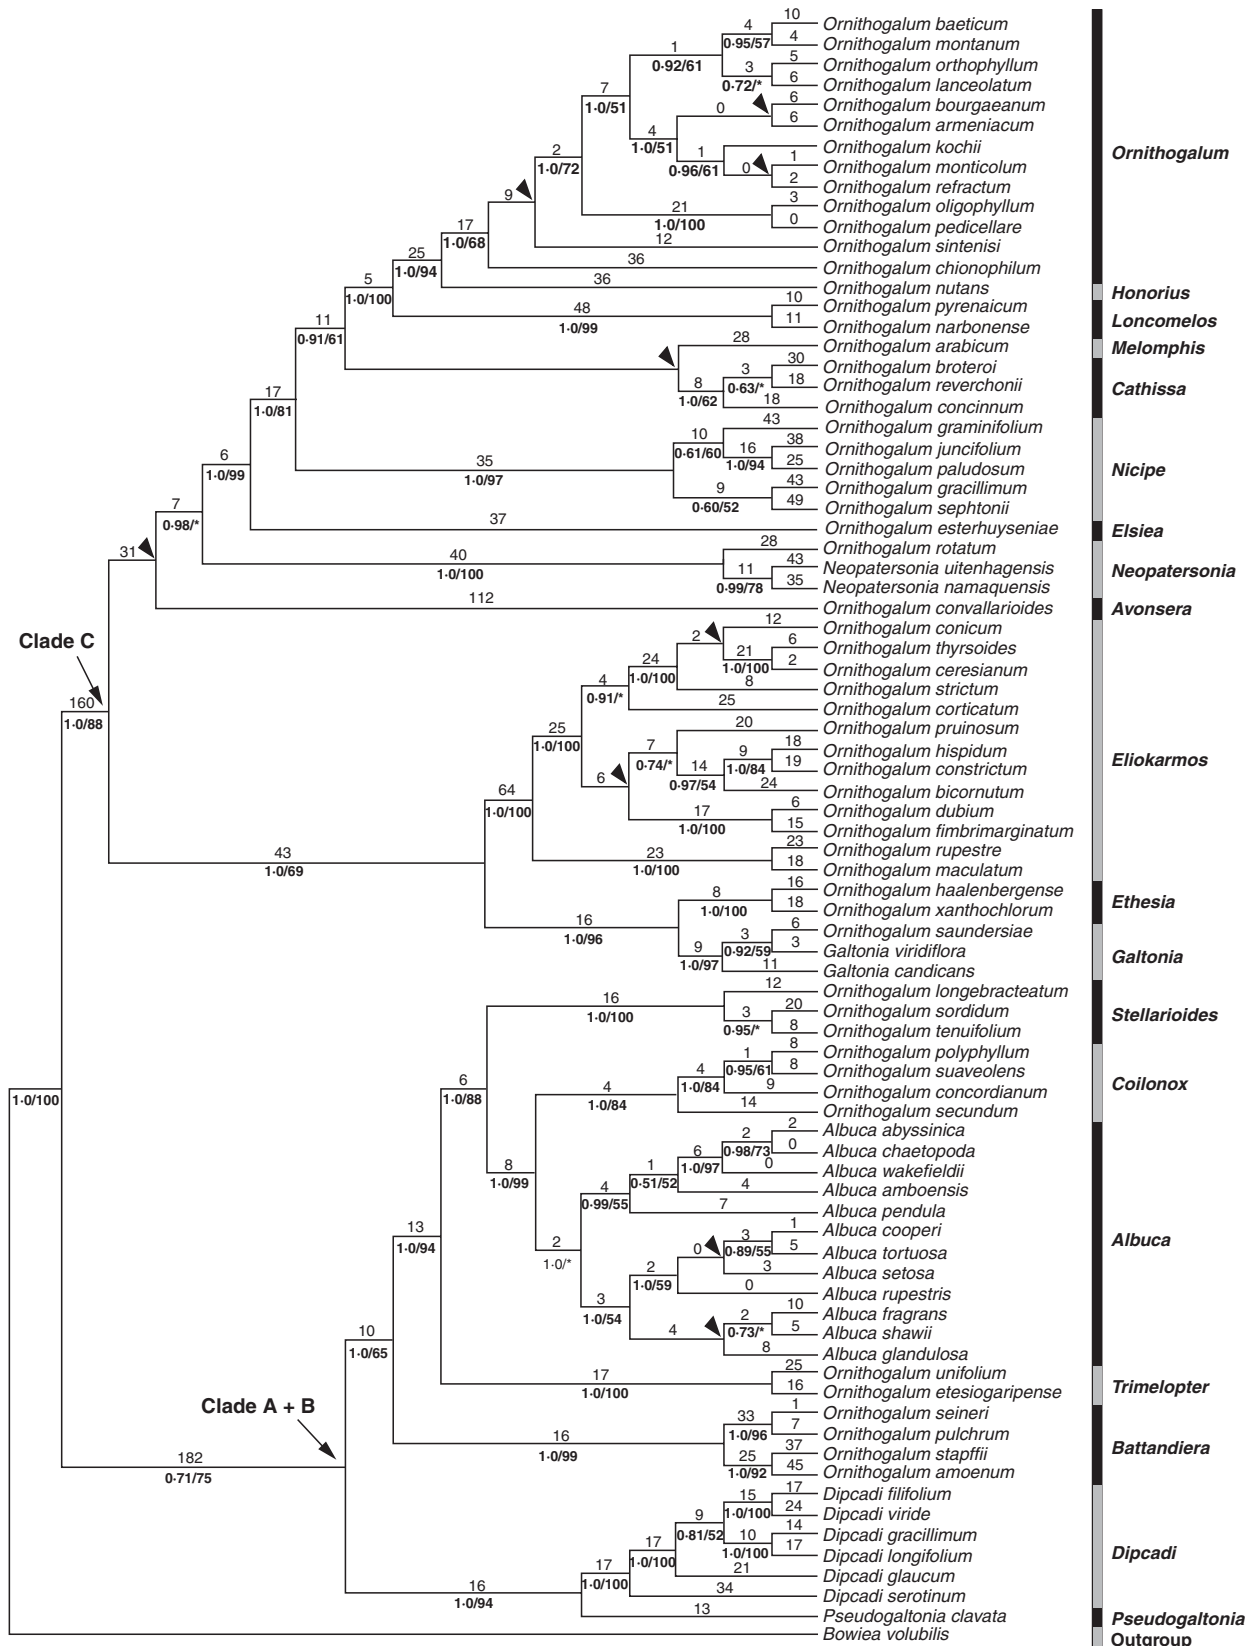

FIG. 2. Bayesian inference analysis of the combination of *rbcL*, *trnL-F*, *matK* and ITS sequences in the phylogenetic analysis of *Ornithogaloideae*. Phylogenetic relationships shown by one of the post-burn-in topologies. Taxa are identified following the traditional treatment of *Ornithogalum* and other related genera (cf. Obermeyer, 1978; Zahariadi, 1980; Müller-Doblies and Müller-Doblies, 1996). The new proposed generic circumscription of the present study is shown on the right side. Branch lengths are shown above branches, and posterior probabilities and bootstrap percentages are shown below. Arrows indicate branches that collapse in the 50% majority rule consensus tree obtained by Bayesian analysis.



Oberm. (= *Elsiea*) is strongly supported (1.0 PP; 99 % BS) as sister to the rest of taxa. The species of *Nicipe* form a strongly supported subclade (1.0 PP; 97 % BS), sister to the rest of the Eurasian and North African taxa (0.91 PP; 61 % BS). The species of *Cathissa* form a clade (1.0 PP; 62 % BS). Relationships of *Melomphis*, which is represented here only by *O. arabicum* L., are not resolved. Finally, the species of *Loncomelos* form a strongly supported subclade (1.0 PP; 99 % BS), which is sister to *Honorius* plus *Ornithogalum* (1.0 PP; 94 % BS), with *Ornithogalum* being rather well supported (1.0 PP; 68 % BS).

#### Evaluation of morphological characters

Only some of the 34 morphological characters studied (Table S1 in Supplementary data) were shown to be important for the taxonomy of the subfamily, as commented on below.

**Central longitudinal white band on leaves (character 9)** The reconstruction of character states reveals the concolour leaves as plesiomorphic in the subfamily, and the white-banded leaves are thus synapomorphic for some species of *Ornithogalum* (*sensu stricto*).

**Inflorescence structure (character 11)** Most species of *Ornithogaloideae* have helicoidally disposed flowers, a character state that appears to be plesiomorphic. Therefore, according to our analysis, the usually unilateral inflorescence of *Dipcadi* is an autapomorphy of this genus, with a high discriminant taxonomic value.

**Flower disposition (character 12)** In most species the flowers are patent to erect, which is the plesiomorphic state. Conversely, some species of *Albuca*, *Dipcadi*, *Galtonia*, *Honorius* and *Pseudogaltonia* have nodding flowers, an apomorphy which has evolved independently in several lineages of the subfamily.

**Main colour of tepals (disregarding the central band) (character 14, Fig. 3A)** Whereas most of the Eurasian representatives of the subfamily have white flowers, this state is an apomorphy that was acquired secondarily in many of the clades of *Ornithogaloideae*. Coloured flowers are thus a plesiomorphic state in the subfamily that is more common in the species from southern Africa.

**Darker central band on tepals (character 16, Fig. 3B)** Species of clade A + B (tribes *Dipcadieae* plus *Albuceae*, *sensu Manning et al., 2009a*) have tepals with a usually evident and well-defined wide darker central band on both sides of the tepals, rarely somewhat diffused on the adaxial face. In contrast, clade C (tribe *Ornithogaleae*) has unmarked tepals or tepals with a central band only visible on the abaxial side, as in *Ornithogalum sensu stricto* or some species of *Nicipe*, *Eliokarmos* and *Neopaterosonia*. Therefore, tepals banded on both sides are a symplesiomorphy in clade A + B, whereas in clade C, the unmarked tepals (such in *Melomphis*, *Cathissa*, *Elsiea*, *Avonsera* and some *Eliokarmos* and *Nicipe*) are plesiomorphic, though in some other clades the banded abaxial side of tepals is an apomorphy that appeared independently several times.

**Inner tepal disposition (character 17)** Most representatives of the subfamily show spreading, not connivent, inner tepals as a symplesiomorphy. However, in some groups such as *Albuca* and *Dipcadi* connivent inner tepals are an apomorphy.

**Fusion of tepals and filament adnation (characters 19 and 21, Fig. 3C)** The character state reconstruction shows fusion of tepals and adnation of filaments to the perigone as plesiomorphic states in the subfamily, as it occurs in the other subfamilies of Hyacinthaceae, the free tepals and filaments being apomorphic and having evolved independently in different clades. Most genera with all or some of their species with a fused perigone and adnate filaments (e.g. *Pseudogaltonia*, *Dipcadi*, *Battandiera*, *Galtonia*, *Avonsera*, *Neopaterosonia*, *Elsiea* and *Nicipe*) are mostly distributed in the southern hemisphere. Conversely, the number of species with free tepals and filaments is dominant in the subfamily and are common among the Eurasian taxa, with few exceptions (e.g. *Dipcadi serotinum*).

**Capsule section (character 27)** Trilobate cross-section of capsule (including those 6-lobed by further furrowing of individual lobes) is the apomorphic state, which has evolved independently several times in *Ornithogaloideae*. Capsules with rounded or trigonous section appear to be plesiomorphic. This character in combination with other reproductive features has proved to be important in the taxonomy of the genera.

**Position of the dry perianth with respect to the capsule (character 29)** In some clades of *Ornithogaleae*, the perianth withers and remains appressed, concealing the fruit. This is an apomorphy which characterizes some genera such as *Cathissa*, *Eliokarmos* or *Nicipe*. The plesiomorphic state of this character is present in most of the remaining genera, the fruits being totally or mostly exposed, never hidden.

**Seed morphology (character 30, Fig. 3D)** This feature appears to be useful in the classification of the subfamily. Species of clade A + B (tribes *Dipcadieae* plus *Albuceae*, *sensu Manning et al., 2009a*) produce mostly flattened and subdiscoid seeds, this character being plesiomorphic. In clade C (tribe *Ornithogaleae*, *sensu Manning et al., 2009a*), the irregularly compressed or polygonal seeds are common and also plesiomorphic, whereas globose seeds are rare and exclusive apomorphies of some genera, such as *Avonsera*, *Honorius*, *Neopaterosonia* and *Ornithogalum*.

**Testa morphology (character 31)** Puzzle-like testas are widespread and plesiomorphic in the subfamily, whereas those verruculose and reticulate are apomorphic. Most species of clade A + B (tribes *Dipcadieae* plus *Albuceae*, *sensu Manning et al., 2009a*) show puzzle-like testas, excepting a few taxa of *Albuca* (e.g. *A. echinosperma* U. Müll.-Doblies) and species of *Trimelopter*. Similarly, this pattern is also common in taxa of clade C (tribe *Ornithogaleae*, *sensu Manning et al., 2009a*), and it is the basis on which two additional secondary morphologies can arise that constitute apomorphies for some groups. On the one hand, *Ornithogalum* plus *Honorius* have a coarsely reticulate testa, in which the anticlinal walls of cells are prominent and undulate, with the central part sunken. On the other hand, some taxa of *Eliokarmos*, *Neopaterosonia*, *Nicipe* and *Cathissa* produce seeds with a

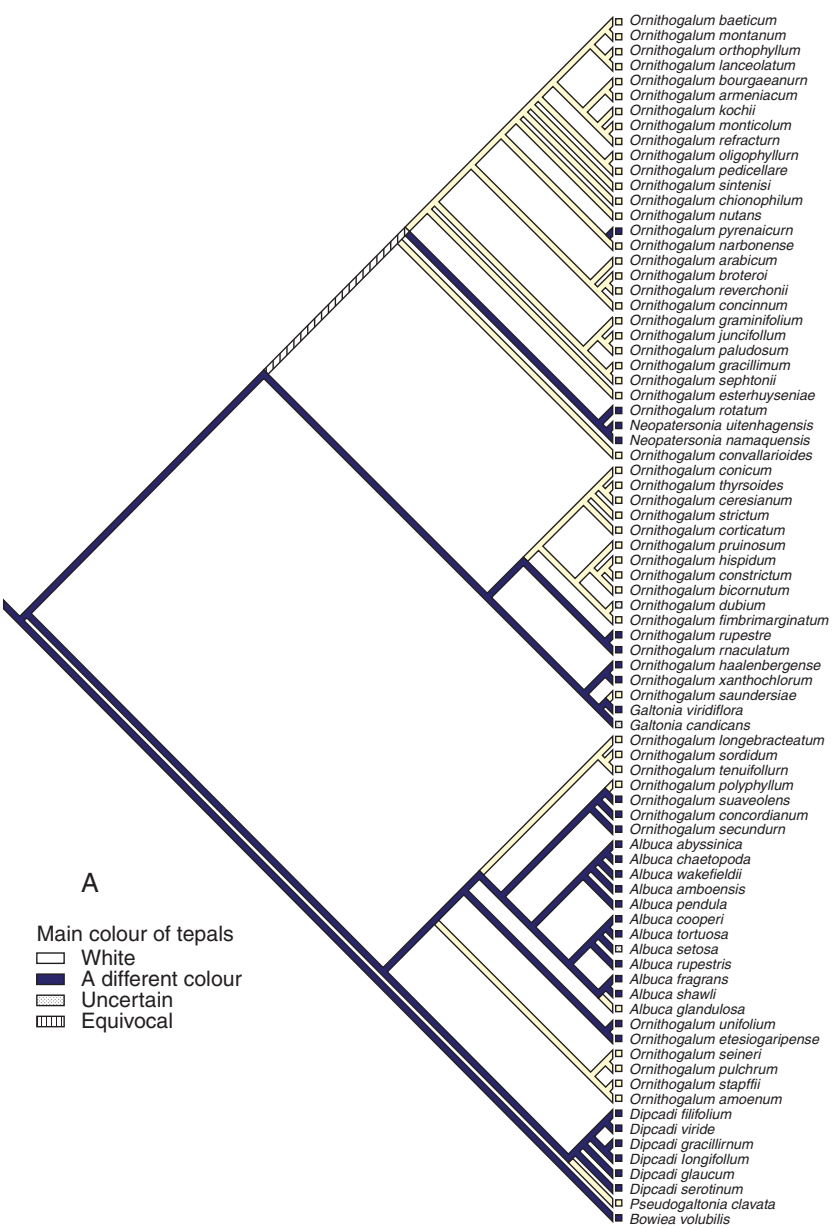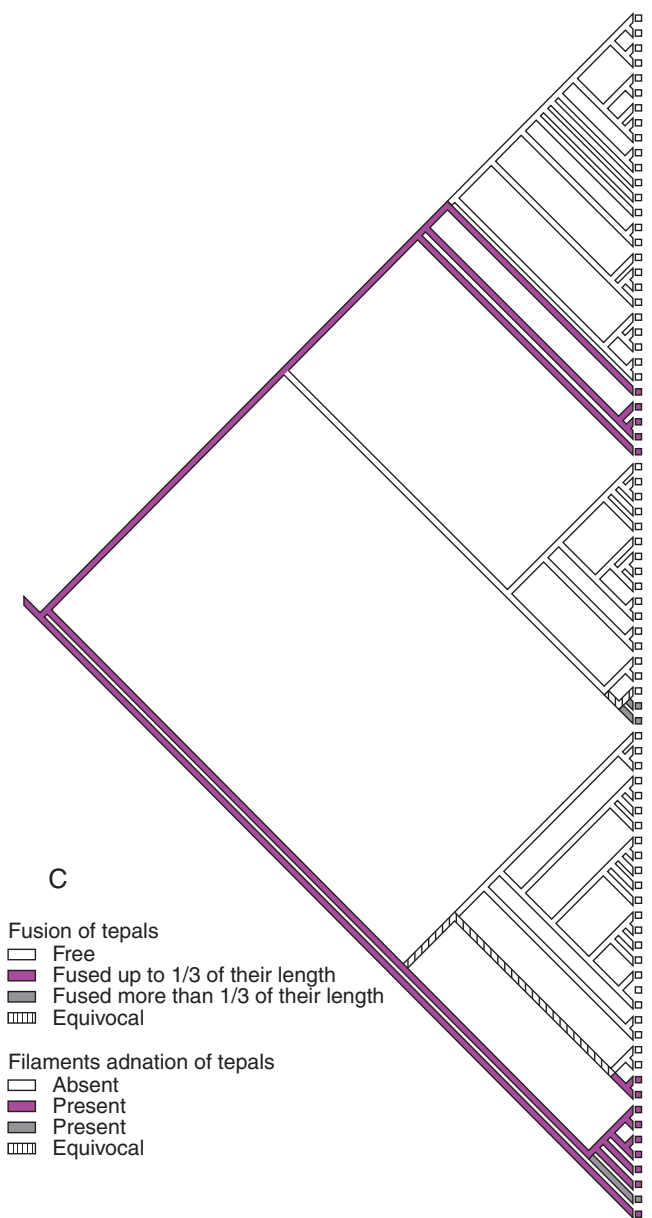

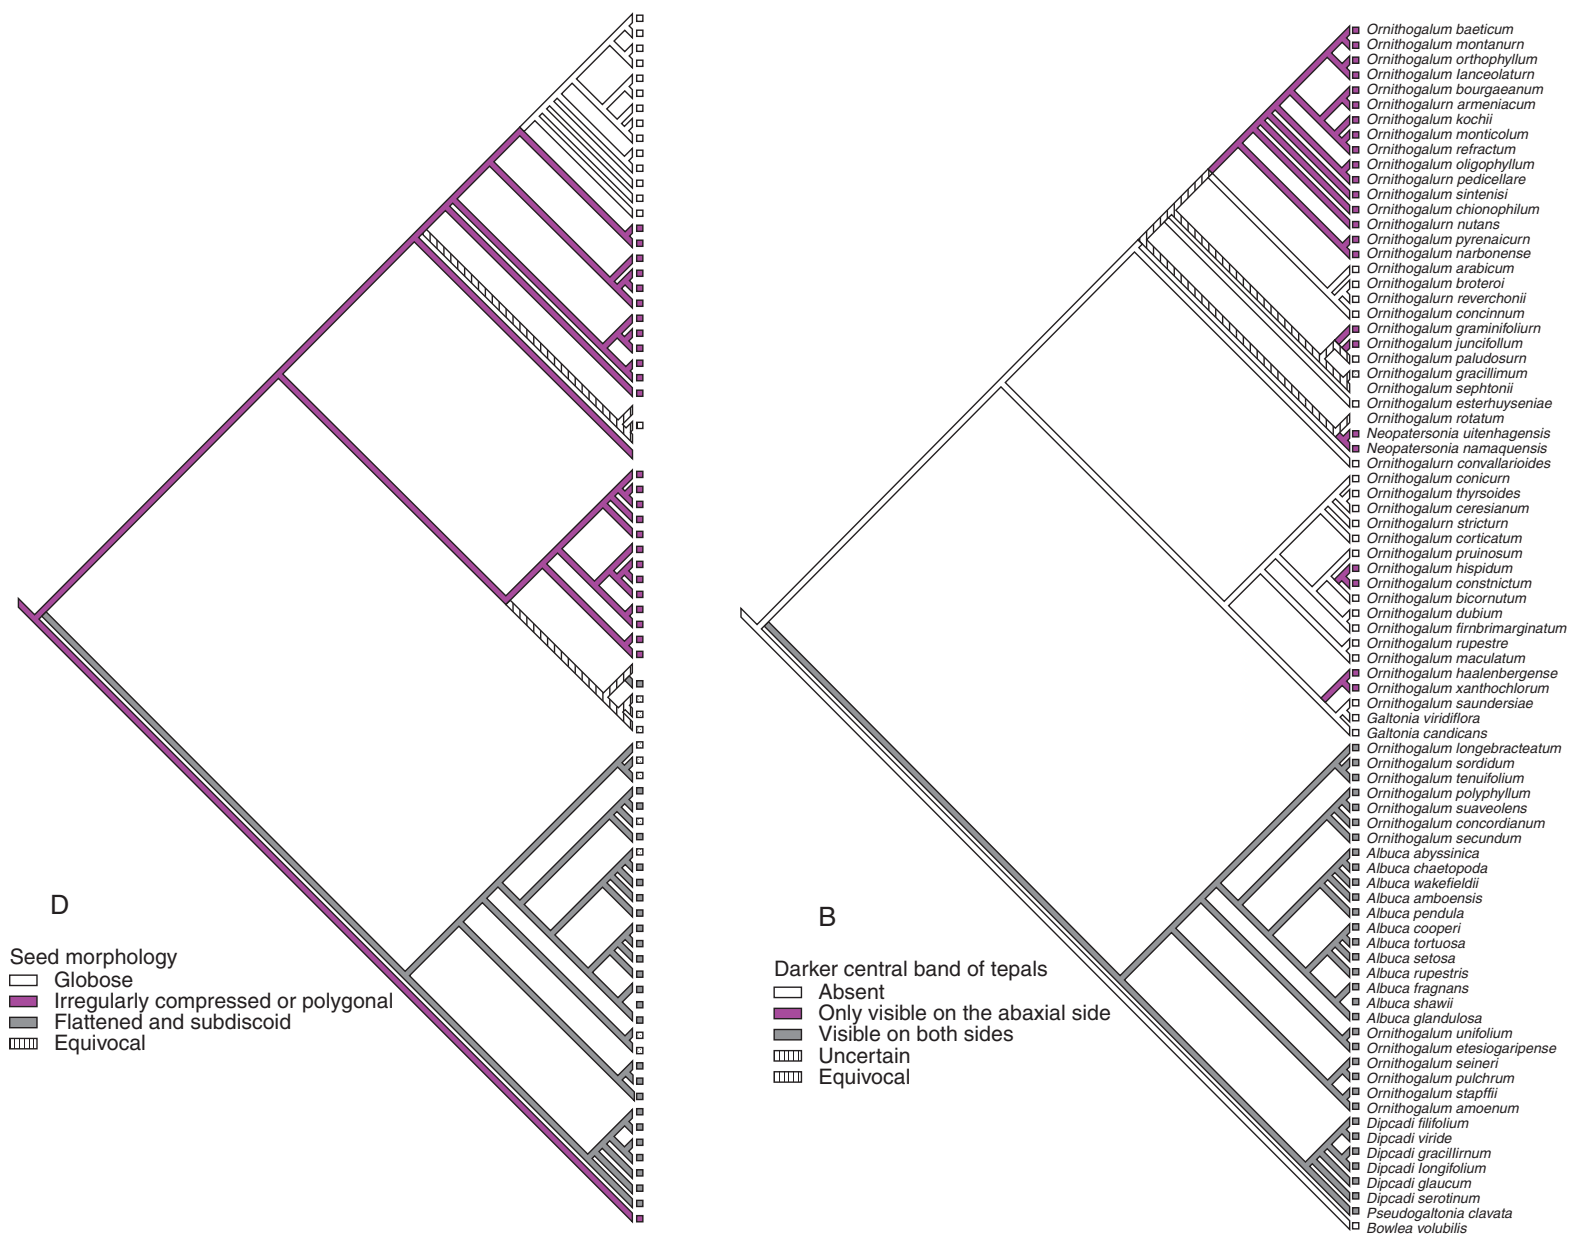

FIG. 3. Reconstruction of character distribution in a post-burn-in tree obtained by a Bayesian inference, after combination of all the DNA regions studied: (A) main colour of tepals; (B) darker central band on tepals; (C) fusion of tepals and adnation of filaments to tepals; (D) seed morphology. All characters are unordered.



granulate to echinulate testa in which the basal puzzle-like pattern can sometimes also be observed.

*Seed disposition (character 32)* Most species of *Ornithogaloideae* have biseriate or multiseriate seeds per locule of the capsule, this being the plesiomorphic state. Uniseriate seeds are present in *Pseudogaltonia*, *Dipcadi* and *Battandiera*, the seeds being flattened and horizontally stacked in each locule.

## DISCUSSION

Recent studies by Manning *et al.* (2004, 2009a) and Wetschnig *et al.* (2007) have greatly clarified phylogenetic relationships in *Ornithogaloideae*. In their most recent paper, Manning *et al.* (2009a) found three major clades within *Ornithogaloideae* that they treated as three tribes and four genera: *Dipcadiaceae* (*Pseudogaltonia* and *Dipcadi*), *Albucoaceae* (*Albuca*) and *Ornithogaleae* (*Ornithogalum*). Furthermore, they recognized many subgenera, sections and series, mainly in *Albuca* and *Ornithogalum*. Both these genera *sensu* Manning *et al.* (2009a) are extremely variable from a morphological point of view, and are difficult to define within *Hyacinthaceae*.

In the present study, the combination of plastid and nuclear DNA sequences resulted in well-supported phylogenetic trees (Fig. 2) in which most of the clades are congruent with monophyletic genera previously described on the basis of morphological syndromes (Table 2). The addition of ITS sequences generated trees with greater resolution and support than those based only on plastid regions. The topology of our combined trees is similar in some aspects to the one obtained by Manning *et al.* (2009a). The three tribes they accepted, clade A (*Albucoaceae*), clade B (*Dipcadiaceae*) and clade C (*Ornithogaleae*), are also present in our combined trees (Fig. 2). However, notable differences can be identified.

*Dipcadiaceae* are sister to *Albucoaceae*, not to *Ornithogaleae*, though with only moderate support. This relationship is founded on some morphological synapomorphies which are exclusive in the subfamily and common to most of *Dipcadiaceae* plus *Albucoaceae*, such as the coloured band usually visible on both sides of the tepals and associated with several aggregated medial nerves, or on other features shared by *Dipcadi* and *Battandiera* (tribe *Albucoaceae*) such as the wide, quadrate and apically truncate capsule and flat, discoid, horizontally stacked and uniseriate seeds. These new relationships found in the combined trees make these groups more homogeneous, reducing the number of homoplasious characters. Moreover, another important difference is found in the *Albucoaceae*. Manning *et al.* (2009a) accepted *Coilonox* as a monophyletic subgenus of *Albuca* (as *A.* subgenus *Osmyne*), resulting in their *A.* subgenus *Albuca* not being monophyletic. In contrast, the present results demonstrate monophyly of both groups, with complete separation fully supported in the Bayesian analysis (1.00 PP).

Another important divergence is found in the *Ornithogaleae* clade, which Manning *et al.* (2009a) regarded as the single, extremely variable genus *Ornithogalum*. They divided *Ornithogalum* into four subgenera: *Avonsera*, *Galtonia*, *Aspasia* and *Ornithogalum*. Although the first three are

rather homogeneous in morphology, *Ornithogalum* remained extremely heterogeneous, with seven sections most of which have sometimes been treated as separate genera. First, they placed the monophyletic *O.* section *Linaspasia* (southern and eastern Africa) embedded with a low support among sections *Cathissa*, *Melomphis*, *Ornithogalum* and *Honorius* (all of them native to Eurasia and North Africa). Our tree shows the *Nicipe* clade as sister to the rest of Eurasian sections, a position that makes phylogenetic relationships in the group much more understandable as discussed later. Moreover, in order to make *O.* section *Ornithogalum* monophyletic, Manning *et al.* (2009a) expanded it to include *Loncomelos* (*O.* subgenus *Beryllis*), therefore constructing a morphologically heterogeneous aggregate which is difficult to define with regard to other sections. In our trees, the *Loncomelos* clade is sister to the monophyletic *Ornithogalum*, allowing easy morphological circumscription of both groups. Relationships of the remaining groups are similar to those obtained by Wetschnig *et al.* (2007) and Manning *et al.* (2009a), and will be discussed later.

Finally, Wetschnig *et al.* (2007) found *Igidia volubilis* (H.Perrier) Speta, a monotypic genus native to Madagascar, to be sister to the clade comprising taxa of *Albuca*, *Coilonox* and *Stellarioides*, though based exclusively on sequences of the *trnL-F* region. Manning *et al.* (2009a) included only that same sequence in their analysis (they did not obtain *rbcL* or *matK*) and *Igidia* was sister to the *Stellarioides* (*sensu stricto*) clade (as *Albuca* subgenus *Urophyllon*). In our analyses, no sequences of that genus were included, and hence its phylogenetic relationships to the rest of *Ornithogaloideae* will not be elucidated until new molecular evidence is available. Nonetheless, if one accepts that *Igidia* is related to the *Stellarioides sensu stricto* clade, it should constitute an independent genus on the basis of its remarkable morphological apomorphies (cf. Speta, 1998a, b; Wetschnig *et al.*, 2007). Further research is currently being carried out to clarify this point (W. Wetschnig, pers. comm.).

### *Why the need for another new arrangement?*

Following studies by Speta (1998a) and Pfosser and Speta (1999), 13–15 genera were accepted within *Ornithogaloideae* (Table 2). This arrangement was based exclusively on morphology and/or sequencing of a single plastid region (*trnL-F*). Some genera as circumscribed by these authors (e.g. *Stellarioides*, *Eliokarmos* and *Neopaterosonia*) have, however, been demonstrated to be para- or polyphyletic in recent studies (including the present one, as discussed below).

The phylogenetic studies of *Hyacinthaceae* by Manning *et al.* (2004) added the *rbcL* region to the previous studies with *trnL-F*, and improved knowledge of the phylogenetic relationships of some groups. They reported a strict consensus tree with many polytomies, notably in *Ornithogaloideae*, perhaps due to the low nucleotide variation in these regions (Lihová *et al.*, 2004; Shaw *et al.*, 2005; Pirie *et al.*, 2007). Nonetheless, Manning *et al.* (2004) adopted a ‘maximally stable arrangement’, with a single genus *Ornithogalum* for the whole subfamily. According to Lebatha *et al.* (2006), the polytomies in the strict consensus trees for *Hyacinthaceae* show a conflict or lack of hierarchy among groups, though it



would not justify their fusion. These latter authors also pointed out that morphology can be useful in elucidating phylogenetic relationships in the family.

The addition of another plastid region (*matK*) resulted in a better-resolved topology and in a new taxonomic arrangement (Manning *et al.*, 2009a). Their new proposal was produced in a scenario in which three more or less contradictory taxonomies were discussed. The first (Option 1) retains as far as possible genera accepted by Speta (1998a), with the recircumscription or addition of as many genera as necessary to preserve monophyly. The second (Option 2) assumes only one genus, *Ornithogalum*, following Manning *et al.* (2004). The third (Option 3) is an intermediate, medium-conservative solution in which only four genera are accepted, corresponding to the four main lineages found in the plastid tree. All three options were extensively discussed, and finally the solution with four genera was favoured (Table 2). However, different criteria appear to be used to assign generic rank to particular clades. For instance, the sister groups *Pseudogaltonia* and *Dipcadi* are segregated as proper genera on the basis of morphological characters that are of a similar degree (or even weaker) than those separating other related clades, such as *Neopateronia*–*Ornithogalum*, *Galtonia*–*Ornithogalum*, *Battandiera*–*Albuca* or *Coilonox*–*Albuca*, which are treated as subgenera or sections.

As pointed out by Manning *et al.* (2009a), recognition of many monophyletic genera (as favoured here), or acceptance of only four genera with many subgenera and sections (as they proposed), are both equally valid on theoretical grounds. However, Manning *et al.* (2009a) rejected the solution with many genera (Option 1) since it would require radical taxonomic changes including ‘the creation of six or seven new genera, and the unprecedented dismemberment of *Ornithogalum*’ and the need for a large number of combinations in ‘genera that are either new or have not been used in modern times’. In their opinion, all these ‘obligate’ new nomenclatural proposals would be a handicap to acceptance of such an arrangement, and hence it would not be supported by botanists (mainly South African), since it is more disruptive and appears to lack nomenclatural stability.

In their arrangement, the genera *Albuca* and *Ornithogalum* are hard to recognize, since they are broadly defined from a morphological point of view. However, they are divided in nine subgenera, 13 sections and 12 series, mostly on the basis of morphological affinities, although one (*A.* subgenus *Albuca*) is not supported as monophyletic in their trees (cf. Manning *et al.*, 2009a).

Contrary to Stedje (2001b), the arrangement with many genera favoured here is much more consistent with morphology, and matches the molecular phylogenetic data. The new arrangement is not handicapped by any previous treatment and represents a logical circumscription of clades only when sufficient morphological evidence is combined with molecular data and monophyletic groups, as claimed by Manning *et al.* (2009a). Any *a priori* constraint (e.g. criticism by local taxonomists or apparent nomenclatural instability) is unwarranted and counterproductive in taxonomy and systematics. Nomenclatural stability is warranted only by solid establishment of consistent taxonomic groups and a sensible application of rules in the International Code of Botanical Nomenclature (ICBN), and

does not depend necessarily on taxonomic arrangements themselves. A proposed new arrangement will become stable only when it is based on a successful combination of phylogenetic, morphological and biogeographical information, and when it is comprehensive and overlooks taxonomic prejudices and/or regional botanical practices.

On the basis of these considerations, we accept 19 phylogenetically monophyletic groups, which are here treated as separate genera and which are supported by syndromes of morphological characteristics as shown below. The most informative phylogenetically characters correspond namely to the colour of, and presence of, a band on tepals, capsule shape, seed morphology and seed disposition in the capsule locules. Other characters such as perigone features, tepal fusion, disposition of leaves and bulb shape and size, are homoplasious in the subfamily. However, contrary to the arguments of Stedje (2001b) and Manning *et al.* (2009a), they are useful for taxonomy and do not generate inappropriate or unstable associations when they are properly combined with the other relevant features.

Homoplasy is common in most large families of monocots (e.g. Orchidaceae and Amaryllidaceae, among others), and Hyacinthaceae are no exception. Contrary to arguments of Stedje (2001b) and Manning *et al.* (2009a), broader generic circumscriptions make it more difficult to understand relationships among species groups, from morphological and phylogenetic points of view, since they underestimate the value of particular apomorphies. Recognition of groups which are too wide (such as *Albuca* and/or *Ornithogalum*, in Options 2 and 3 *sensu* Manning *et al.*, 2009a), although monophyletic, only increases heterogeneity in each and causes difficulties in morphological definition. The existence of small genera (monotypic or with two or three species) is not necessarily an inconvenience; in contrast, when small clades are well defined morphologically, molecularly and phylogenetically, they can merit generic rank, depending on the general criteria used. Other subfamilies of Hyacinthaceae (e.g. Hyacinthoideae) are treated by Manning *et al.* (2004) in a narrower way, with  $\leq 11$  genera being recognized. Morphological syndromes characterizing genera in Hyacinthoideae are similar to those allowing recognition of 19 genera in Ornithogaloideae. The use of two different criteria in these close subfamilies appears to be inappropriate, since homoplasy is equally common in both groups. Therefore, the arrangement favoured here (with many genera, based on clades obtained in the combined trees) is more natural and easier to understand from a global view of the family. Furthermore, as asserted by Müller-Doblies (2006) ‘a splitting of *Ornithogalum* seems to be by far the better taxonomic solution of the molecular data than the sinking of *Albuca* and other genera into *Ornithogalum*, which results in a huge taxonomic dustbin’.

A discussion of clades accepted at the genus rank in the taxonomic arrangement follows below. Disagreements and/or incongruence with previous, recent comprehensive treatments (Speta, 1998a; Manning *et al.*, 2004, 2009a) are also discussed.

#### *The Pseudogaltonia clade*

For a long time, *Pseudogaltonia* has been accepted as including a single species, *P. clavata* (Mast.) Phillips, distributed



throughout arid regions of north-west South Africa (Richtersveld), Namibia and Botswana. It was first described within the genus *Galtonia*, which grows exclusively in precipitation-rich, summer-rainfall, high-elevation regions of the Drakensberg, Low Drakensberg, Southern Berg and Natal Midlands in the eastern provinces of South Africa (KwaZulu-Natal, Free State, Mpumalanga and Eastern Cape). However, most later experts on Hyacinthaceae recognized *Pseudogaltonia* as a separate genus (Kuntze, 1886; Durand, 1890; Phillips, 1935; Hilliard and Burt, 1988; Speta, 1998a, b; Manning et al., 2009a, b), based on biogeography and morphological features, including the large bulb with cartilaginous and fibrous outer tunics, the racemose pyramidal inflorescence, tepals fused to form a long tube (for about three-quarters of their length) and somewhat curved and swollen at the base (autapomorphy), stamens exserted and inserted at the mouth of the perianth tube (autapomorphy), style thin and >2 cm long (autapomorphy), capsule quadrate, truncate and deeply trilobate and uniseriate seeds with five to seven angled polygonal testa cells (see Phillips, 1935; Jessop, 1975; Speta, 1998a; Manning et al., 2009a, b). Recently, an additional species, *P. liliiflora* J.C.Manning & Goldblatt has been described (cf. Manning et al., 2009b) from Richtersveld, which is morphologically close to the former. Our phylogenetic studies provide further evidence for *P. clavata* being placed far from *Galtonia* as sister to the *Dipcadi* clade, as previously pointed out (Pfosser and Speta, 1999; Manning et al., 2004, 2009a; Wetschnig et al., 2007). Accordingly, *Pseudogaltonia* is here accepted at the generic rank.

#### The *Dipcadi* clade

*Dipcadi* has been widely accepted by most researchers on Ornithogaloideae (Heywood, 1980; Valdés, 1987; Speta, 1998a, b; Manning et al., 2002, 2009a). It is characterized by two autapomorphies (the usually unilateral raceme and tepals curved outwards in the apical part) and by other features such as the tepals fused into a tube approx. one-quarter to one-third (to two-thirds) of their length, stamens adnate to the tube and included, capsule quadrate in outline, as broad as or broader than long, truncate at the apex, and seeds discoid, flattened, horizontally stacked and uniseriate in each locule with five to seven angled polygonal testa cells (cf. Obermeyer, 1964; Jessop, 1975; Heywood, 1980; Valdés, 1987; Speta, 1998a; Manning et al., 2002, 2009a). It is important to note that some species of *Albuca* produce almost unilateral racemes due to the decumbent growth of scapes, a pattern which is quite different from that found in *Dipcadi*.

All the species of *Dipcadi* studied in these phylogenetic analyses form a fully supported clade, sister to *Pseudogaltonia*. These results are identical to those obtained by Pfosser and Speta (1999) and Manning et al. (2004). The former authors recognized both genera, whereas the latter authors combined them under *Ornithogalum*. Recently Manning et al. (2009a) reversed their previous opinion (cf. Manning et al., 2004) and recognized the generic identity of both *Pseudogaltonia* and *Dipcadi*. Based on the data presented here and on unequivocal morphological and phylogenetic evidence, the traditional concept of *Dipcadi*, following Pfosser and Speta (1999), is maintained. Manning et al. (2009a)

suggested two series within *Dipcadi*, one including species with caudate apical appendages (*D.* series *Uropetalon*), and the other including those lacking these appendages (*D.* series *Dipcadi*). However, their phylogenetic tree does not provide support for that classification, since neither series was monophyletic. Our phylogenetic results also recovered the polyphyly of these series.

#### The *Battandiera* clade

Manning et al. (2004, 2009a) showed that three species of *Ornithogalum* occurring in the desert regions of Namibia and South Africa (*O. seineri*, *O. pulchrum* and *O. stapffii*) form a well supported clade, sister to the rest of *Albuca*. This result is also found in our combined analysis. However, our ITS data (Fig. 1) placed this clade as sister to *Dipcadi*, with moderate support. This can be explained because all these latter taxa share the same type of discoid, flat seeds, horizontally stacked and uniseriate in each locule, with angled polygonal or slightly undulate testa cells (Fig. 4I and J), a rare character in the subfamily which supports their close phylogenetic relationship. The uncertain position of this group raises questions about the circumscription of *Dipcadi* (*sensu* Manning et al., 2009a), and even the necessity for its segregation from *Albuca*. In Fig. 2, these tribes are thus grouped as 'Clade A + B'.

All three species in this clade are characterized by tepals with an evident longitudinal band visible on both sides, the wide capsule, quadrate and truncate at the apex, with darker transverse nerves, and the peculiar seed testa, shape and disposition (cf. Leighton, 1945; Obermeyer, 1978; Manning et al., 2009a), similar to those of *Dipcadi*. In our combined phylogenetic trees, and after the expansion of sampling to include more Eurasian and north African species, *O. amoenum* (Fig. 4I and J) was found to be deeply embedded in this clade. It is a rare and rarely collected plant which comes from the desert regions of North Africa (Morocco and Algeria), and shares the habitat, capsule and seed morphology with *O. seineri*, *O. pulchrum* and *O. stapffii*. These peculiar features, different from all Eurasian species of *Ornithogalum*, led Maire (1926) to describe the monospecific genus *Battandiera* to include *O. amoenum*. Similarly, the Namibian and South African species of this clade were segregated in the past in different taxa (Table 2). In our phylogenetic studies, the clade *O. seineri*–*O. amoenum* receives strong support. This fact, together with a clear morphological and phylogenetic difference (cf. Obermeyer, 1978; Müller-Doblies and Müller-Doblies, 1996; Manning et al., 2009a) with regard to related taxa, leads us to recognize *Battandiera* as a separate genus, though with some necessary circumscription. Some species of this group, including *O. amoenum*, *O. stapffii*, *O. candidum* Oberm., *O. tubiforme* (Oberm.) Oberm. and *O. rautanenii* Schinz, occurring mainly in the western arid regions of Africa (Namibia and Morocco–Algeria), have tepals fused in a short tube  $\leq 5$  mm long, whereas others such as *O. seineri*, *O. donaldsonii* (Rendle) Greenway and *O. pulchrum* have free tepals and grow mostly in the eastern regions of Africa (from western Namibia to Kenya). The existence of fused or free tepals in this genus can be explained by the former state being

plesiomorphic in the subfamily and having evolved independently in several clades (Fig. 3C). The cited morphological and biogeographical differences are also supported by our phylogenetic analysis, since *O. amoenum* plus *O. stapffii* form a clade sister to the *O. seineri* plus *O. pulchrum* clade, both of which are strongly supported. Further studies, including wider sampling, are being carried out to clarify internal relationships among members of this genus.

Inclusion of *Battandiera* in *Albuca* (as *A.* subgenus *Namibiogalum*) as Manning *et al.* (2009a) suggested, results in a highly heterogeneous *Albuca*, which does not reflect the clear morphological divergence with highly informative phylogenetic characters (e.g. capsule shape, seed morphology and arrangement in the capsule). Moreover, that inclusion would not be possible on the basis of the ITS tree obtained, as

stated above. Segregation of *Battandiera* reduces heterogeneity in genera of the subfamily (cf. Manning *et al.*, 2009a), making *Albuca* more coherent. Moreover, circumscription of *O.* subgenus *Namibiogalum sensu Manning et al.* (2009a), with the inclusion of *O. prasinum* and *O. toxicarium* C.Archer & R.H.Archer, is not consistent with morphology (cf. Lindley, 1816; Archer and Archer, 1999) or our combined trees. *Ornithogalum prasinum* and *O. toxicarium* are not related to one another, and are allied to other groups as shown below.

#### The Trimelopter clade

The *Trimelopter* clade includes *O. unifolium* and *O. etesiogariense*, two species occurring in arid regions of western South Africa and southern Namibia (Sperrgebiet). These taxa are differentiated from the rest of the subfamily by the presence of a single, elliptic to narrowly oblong leaf (exceptionally two or three leaves), usually flattened against the ground, an apomorphy of the group (cf. Manning *et al.*, 2009a); the ovaries and capsules have three prominent carpels, each with two longitudinal keels down the back and a groove between (Fig. 4G and H); and the seeds are unequally compressed or semi-discoid (cf. Dyer, 1931; Leighton, 1944; Obermeyer, 1978; Manning *et al.*, 2009a). Due to their morphological peculiarities, these plants have been treated at various taxonomic ranks (Table 2). Rafinesque (1837) described the genus *Trimelopter*, including only *O. fuscatum* Jacq. (= *O. unifolium* Retz.) (Fig. 4F), which Obermeyer (1978) included (as *O. unifolium*) in *O.* subgenus *Urophyllon*. Müller-Doblies and Müller-Doblies (1996) described *O.* subgenus *Urophyllon* section *Monarchos* to accommodate 11 related species. Finally, Manning *et al.* (2009a) recognized section *Monarchos* as *Albuca* subgenus *Monarchos*. The phylogenetic study by Manning *et al.* (2004, 2009a) found strong support for the clade of *O. unifolium* and *O. etesiogariense* (97–100% BS) and revealed its sister relationship with clades including *Albuca*, *Coilonox* and *Stellarioides sensu stricto*. Our phylogenetic study reveals the same relationship, also with a strong support (Fig. 2). Due to the clear morphological and phylogenetic identity of this clade, the genus *Trimelopter* is accepted here, following Rafinesque (1837), though it is expanded to include the species of *O.* section *Monarchos* (*sensu Müller-Doblies and Müller-Doblies*, 1996), with the exclusion of *O. rotatum* because of its disruptive morphology and phylogenetic position. This latter species is evidently connected to taxa in the *Neopateronia* clade, as discussed later.

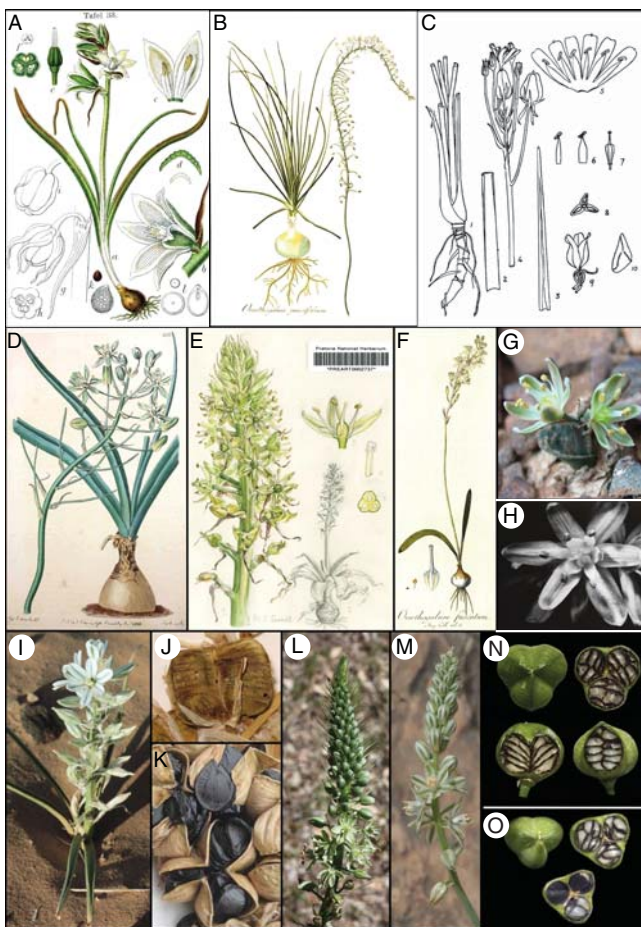

FIG. 4. Morphological variation in several genera of Ornithogaloideae: (A) *Honorius boucheanum* (from Sturm, Deutschlands Flora in Abbildungen: tab. 33. 1796, as *Ornithogalum boucheanum*); (B) *Nicipe juncifolia* (from Jacquin, Plantarum Rariorum Horti Caesarei Schoenbrunnensis Descriptiones et Icones, 1: tab. 90. 1797, as *O. juncifolium*); (C) *Elsiea corymbosa* (from Leighton in J. S. African Bot. 10: 56. 1944); (D) *Ethesia prasina* (from Lindl., Bot. Reg. 2: tab. 158. 1816, as *O. prasinum*); (E) *E. xanthochlora* (from Pretoria National Herbarium PREART 0002737, as *O. xanthochlorum*); (F) *Trimelopter unifolium* (from Jacquin, Icones Plantarum Rariorum, 2(16): tab. 429. 1795, as *O. fuscatum*); (G and H) *T. dyeri* (pictures by A. P. Dold); (I) *Battandiera amoena* (picture by Stephen L. Jury); (J) capsule of *B. amoena*; (K) capsules and seeds of *B. pulchra*; (L) *Stellarioides longibracteata*; (M) *S. sessiliflora*; (N) Capsules and seeds of *S. longibracteata*; (O) capsules and seeds of *S. sessiliflora*.

#### The Albuca clade

The well-established genus *Albuca* comprises at least 60 species, as traditionally circumscribed (Speta, 1998a), though this number will probably reach approx. 100. They are readily characterized by their floral structures, which clearly differentiate them from the rest of the subfamily. Flowers are nodding, patent or erect, and the tepals are usually dimorphic: the inner ones are erect and connivent, overtopping the stamen and gynoecium, whereas the outers are erect–patent. The filaments have basal constrictions (apomorphy), the ovary has paraseptal crests, the styles are thick and prismatic (autapomorphy) or



narrower and tapering, the capsule is ovoid or oblong, acute or obtuse, and the seeds are flattened, semi-lunate or discoid with smooth or rarely granulate puzzle-like testa (cf. Baker, 1897a, 1898, 1904; Jessop, 1975; Müller-Doblies, 1994, 1995; Speta, 1998a; Manning et al., 1999, 2002, 2009a). Based on a combined *trnL-F* plus *rbcL* phylogeny, Manning et al. (2004) combined all these species into *Ornithogalum*. When they extended the sampling of taxa and sequenced other plastid regions, they considered the traditionally accepted species of *Albuca* as *A.* subgenus *Albuca*, though in their tree it was not clearly monophyletic, without the inclusion of the taxa of *Coilonox*.

In the Bayesian analysis, the present data provide a much better resolved tree, in which the species of *Albuca* form a clade sister to *Coilonox*. This fact, together with the remarkable morphological differences between the groups, supports recognition of *Albuca* at the generic rank, as suggested by Müller-Doblies (2006) and adopted here. Manning et al. (2009a) suggested four sections within *Albuca* subgenus *Albuca*, which we choose not to accept here because they have not been shown to be monophyletic. In the combined trees, species of *Albuca* form two strongly supported groups. One of these fits the concept of the former genus *Pallastema* Salisb., which is well characterized by the slender, almost cylindrical style, and the slightly zygomorphic flowers with all stamen similar and fertile. The other group includes a mixture of taxa formerly referred either to subgenera *Albuca*, *Falconera* and *Leptostyla* (cf. Baker, 1897a; Müller-Doblies, 2006), or to sections *Albuca*, *Falconera* or *Branciona* (cf. Manning et al., 2009a). However, none of these receives support in our phylogenetic trees, perhaps due to the still poor sampling of all these groups. Further research is currently being carried out to clarify this point.

#### The *Coilonox* clade

Some species of *Ornithogalum* (e.g. *O. albucoides* (Ait.) Thunb., *O. secundum* Jacq., *O. suaveolens*, etc.) were segregated in the past at different ranks (Table 2). At the generic rank, *Coilonox* (Rafinesque, 1837) has priority. Species of *Coilonox* possess some similarities with *Albuca* that led several authors to describe species of the former in the latter (cf. Manning et al., 2009a). Although in general terms *Coilonox* and *Albuca* share the longer than wide capsules, the style longer than the ovary and stamens, and the phenology of the flowers, closing at night (cf. Manning et al., 2009a), *Coilonox* does not show the floral structures typical of *Albuca* and hence is quite simple to differentiate (cf. Manning et al., 2009a). In fact, as Müller-Doblies (2006) pointed out ‘there are no real transitions between both genera’. Our phylogenetic results demonstrate the monophyly of both groups and, together with the clear morphological differences, support recognition of both genera, which can be easily differentiated by their floral structure.

#### The *Stellarioides* clade

*Ornithogalum longebracteatum*, *O. sordidum* and *O. tenuifolium* are characterized by large bulbs, sometimes epigeous, with papery and greyish or fleshy and green outer tunics. They usually produce aerial or hypogeous bulbils and

have long, narrow and dense cylindrical inflorescences (Fig. 4L and M), flowers small and numerous, capsule subglobose or widely ovoid to obovoid, trilobate, and seeds flattened or irregularly compressed, with sharpened edges, obliquely stalked in each locule (Fig. 4N) and a puzzle-like testa (cf. Leighton, 1945; Obermeyer, 1978; Speta, 1998a; Manning et al., 2009a). In Africa, the species of this group are mostly distributed in areas characterized by abundant, mainly summer rainfall. They also occur in regions with a bimodal autumn–summer rainfall regime (*O. tenuifolium*) or in semi-arid Mediterranean-climate areas, ranging from high-altitude warm-temperate regions of highveld in South Africa, through the mountains of southern and East Africa as far north as Ethiopia and Morocco–Algeria (*O. sessiliflorum* Desf., Fig. 4M and O). In South Africa, *O. longebracteatum* is usually found in dense thickets and edges of both subtropical and afro-montane forests (Manning et al., 2009a). All these species have been recognized at various ranks (Table 2), and *Stellarioides* (Medikus, 1790) has priority at the generic level. They share a unique syndrome of morphological characters, including the dense and many-flowered inflorescences, with small flowers (tepals  $\leq 12$  mm long), almost sessile to shortly/pedicellate and small capsules  $\leq 1.4$  cm long. The present results show that *O. longebracteatum*, *O. sordidum* and *O. tenuifolium* form a fully supported clade, sister to the *Albuca*–*Coilonox* alliance. With the cited morphological syndrome, this justifies acceptance of *Stellarioides* at the generic rank. In contrast, recircumscription of *Albuca* to include *Stellarioides* as suggested by Manning et al. (2009a) greatly increases the heterogeneity of *Albuca*.

Speta’s (1998a, 2001) concept of *Stellarioides* is almost coincident with that accepted here, and not with that in the tree of Manning et al. (2009a), in which several taxa (e.g. *O. etesiogariense*, *O. haalenbergense*, *O. pulchrum*, *O. rotatum*, *O. seineri*, *O. stapffii* and *O. unifolium*) are treated as members of *Stellarioides*, supposedly following Speta (1998a). Nonetheless, the treatment of Speta (2001) is in need of a few changes: first, the exclusion of *S. donaldsonii* ( $\equiv$  *Albuca donaldsonii*), which is included here in *Battandiera*, and, second, the exclusion of *Trimelopter* and *Ardernia* Salisb. from synonymy, which are synonyms and accepted here as a different genus. It is worth mentioning here that Stedje (2001b) used some taxa of the present clade to exemplify her criticism of Speta’s treatment. In her opinion *O. tenuifolium* Redouté, *O. sessiliflorum* and *O. narbonense* where supposedly undistinguishable from a morphological point of view (only by minor quantitative characters), but apparently they should be included in three different genera (*Stellarioides*, *Cathissa* and *Loncomelos*, respectively) following Speta. However, evidence is here shown that the first two species indeed belong to *Stellarioides*, whereas *O. narbonense* is a member of *Loncomelos* (see below), all showing clear morphological differences and being placed in clades far apart from each other.

#### The *Galtonia* clade

Four species are traditionally included in the genus *Galtonia* (cf. Hilliard and Burt, 1988): *G. candicans*



Decne., *G. princeps* Decne., *G. regalis* Hilliard & B.L.Burt and *G. viridiflora* Verdoorn. They are found in summer-rainfall, high-altitude regions of the Drakensberg, Low Drakensberg, Southern Berg and Natal Midlands (South Africa and Lesotho; Hilliard and Burt, 1988; PRECIS database). *Galtonia* is characterized by large leaves sheathing the stem, racemose inflorescence, with flowers nodding, tepals fused into a campanulate tube for approx. half of their length, filaments cylindrical and adnate, capsule lanceolate cylindrical and acute, and seeds irregularly compressed or flattened with smooth puzzle-like testa (cf. Verdoorn, 1955; Jessop, 1975; Hilliard and Burt, 1988; Riddles and Condy, 2001; Manning et al., 2009a). Because of the unique combination of morphological features, many authors (e.g. Decaisne, 1880; Verdoorn, 1955; Hilliard and Burt, 1986, 1988; Speta, 1998a, b; Riddles and Condy, 2001) recognized *Galtonia* as a genus distinct from *Ornithogalum*. Taxa belonging to *Galtonia* had been also classified as *Hyacinthus* (Baker, 1870) or *Ornithogalum* subgenus *Galtonia* section *Galtonia* (Manning et al., 2009a). In the early molecular phylogenetic work of Pfosser and Speta (1999), *Galtonia* appeared to be polyphyletic, since *G. candicans* was related to *Stellarioides* and *Albuca* and *G. princeps* and *G. viridiflora* fell as sister to *Ornithogalum saundersiae*, a species which has been included in *O.* subgenus *Urophyllon* (Obermeyer, 1978; Müller-Doblies and Müller-Doblies, 1996) or in the monospecific genus *Zahariadia* Speta (nom. nud.). Manning et al. (2004, 2009a) presented evidence for the monophyly of *Galtonia*, with the necessary inclusion of *O. saundersiae*. In their studies *G. candicans*, *G. viridiflora* and *O. saundersiae* formed a strongly supported clade, sister to *O. xanthochlorum* and *O. haalenbergense*. First, they (Manning et al., 2004) synonymized both genera, though later they (Manning et al., 2009a) segregated *Galtonia* as a subgenus of *Ornithogalum*. Our molecular data corroborate their later results and show *Galtonia* plus *O. saundersiae* to constitute a strongly supported clade, which is sister to that comprising *O. xanthochlorum* and *O. haalenbergense*. Connections between *O. saundersiae* and *Galtonia* are surprising, since *O. saundersiae* has a pseudocorymbose inflorescence, erect flowers and free tepals and filaments (cf. Leighton, 1945; Obermeyer, 1978), traits all different from typical *Galtonia*. Moreover, chromosome numbers support separation of these groups, being  $2n = 16$  in *Galtonia* (Speta, 1998a; Forrest and Jong, 2004; Wetschnig et al., 2007) and  $2n = 12, 14$  in *O. saundersiae* (Obermeyer, 1978; Speta, 1998a). However, some morphological features, including the large and sheathing leaves, fleshy tepals, acute capsules and irregularly compressed seeds and biogeography are shared. Although some plastid molecular trees (Pfosser and Speta, 1999; Wetschnig et al., 2007) showed both genera to be monophyletic, our combined results place *O. saundersiae* inside *Galtonia*. Therefore, until new molecular evidence is available, we suggest treating it as a member of *Galtonia*. Related to this matter, Hammet and Murray (1993) found that some tetraploid ( $2n = 32$ ) cultivars of *Galtonia candicans* produced inflorescences up to 2 m, with erect flowers, somewhat similar to those of *O. saundersiae*, which support the discussion above.

#### The *Ethesia* clade

The genus *Ethesia* was described by Rafinesque (1837) to include *O. prasinum* as the sole species (Fig. 4D). Later, Obermeyer (1978) and Müller-Doblies and Müller-Doblies (1996) classified *O. prasinum*, *O. xanthochlorum* (Fig. 4E) and other related species within *O.* subgenus *Urophyllon*. Manning et al. (2009a) presented molecular phylogenetic evidence for a close relationship between *O. haalenbergense*, similar to *O. prasinum* (cf. Müller-Doblies and Müller-Doblies, 1996), and *O. xanthochlorum*, both forming a clade sister to *Galtonia*, and taxonomically interpreted as *O.* subgenus *Galtonia* section *Xanthochlora*. The present molecular phylogenetic study corroborates the results of Manning et al. (2009a). Both species are well differentiated from *Galtonia* by their smaller size; leaves lacking sheaths, sometimes not coinciding with the flowers; tepals greenish; filaments petaloid, white, showy and spreading; capsule obcordate or widely globose and truncate to retuse at the apex; and seeds compresso-angulose, ovate or discoid with one or two ribs and biseriate per locule (cf. Lindley, 1816; Leighton, 1945; Obermeyer, 1978; Manning et al., 2009a). Moreover, *Galtonia* and *Ethesia* have contrasting distribution areas, being found in summer-rainfall and winter-rainfall regions, respectively. Because of the differences in crucial morphological characters we recognize the genus *Ethesia* (Rafinesque, 1837), although with a minimal recircumscription. Inclusion of *O. prasinum* in *Battandiera* (=A. subgenus *Namibiogalum*) as proposed by Manning et al. (2009a) is not justified on the basis of the morphology discussed above (cf. Lindley, 1816). On the contrary, this species appears to be closely connected to *O. haalenbergense* (cf. Müller-Doblies and Müller-Doblies, 1996).

#### The *Eliokarmos* clade

*Ornithogalum conicum* Jacq., *O. thyrsoides* Jacq., *O. dubium* Houtt., *O. maculatum* and other related taxa (cf. Manning et al., 2007) form a well-characterized group, defined by their ciliate or fimbriate (rarely glabrous) leaves; membranous, ovoid, wide and petaloid bracts; large colourful flowers; concolourous, white, yellow, orange or reddish tepals, sometimes with basal or apical maculae; filaments usually expanded or winged; capsules lanceolate or fusiform, usually hidden among the dry perianth segments; and small abundant and irregularly compressed seeds (0.5–2.0 mm), with papillate to echinulate or puzzle-like testa (cf. Baker, 1897b; Leighton, 1944, 1945; Obermeyer, 1978; Manning et al., 2007). Some have great ornamental value and are widely cultivated (Obermeyer, 1978). These species have been recognized at different ranks (Table 2), with *Eliokarmos*, *Tomoxis* Raf. and *Lomaresis* Raf. being published first and simultaneously at the generic level (Rafinesque, 1837). *Eliokarmos* has been recently used by Speta (1998a) at that rank.

Species such as *O. constrictum* F.M.Leight., *O. bicornutum* F.M.Leight., *O. hispidum* Hornem. and other relatives produce capsules and seeds similar to those of section *Aspasia*, but they differ in the long sheathing and ascending leaves, with patent blades arranged at different levels and a tubular cataphyll along the stem, usually not coinciding with the flowers,

bracts narrower and apiculate or aristate, flowers smaller, and tepals usually having a darker longitudinal band only apparent on the abaxial side (cf. Obermeyer, 1978). These species were included in *O.* subgenus *Aspasia* group *Hispidae* (cf. Obermeyer, 1978) or in *O.* section *Hispidaspasia* (cf. Müller-Doblies and Müller-Doblies, 1996).

The phylogenetic studies of Manning *et al.* (2004, 2009a) revealed that all these species form a strongly supported clade. In this clade, two well-supported subclades can be identified: one comprising *O. maculatum* and *O. rupestre*, and the other grouping the rest of species of sections *Aspasia* and *Hispidaspasia*. Our phylogenetic data confirm the findings of Manning *et al.* (2009a), which would support the independent status of *Phaeocles* Salisb. (Salisbury, 1866), including *O. maculatum* and *O. rupestre*, apart from the rest of section. These taxa are peculiar in their glabrous leaves, a rare character in the group. However, no other relevant differences to the rest of the related taxa seem to exist, and therefore we prefer to accept a single genus *Eliokarmos* (including *Phaeocles*) to group all taxa discussed in these paragraphs. This concept is similar to that proposed by Speta (1998a), with the exclusion of taxa belonging to *O.* group *Angustifoliati* (*sensu* Obermeyer, 1978) that is phylogenetically distant from this group and which we recognize as the genus *Nicipe*. Further studies and a more extensive sampling in this group are needed to shed more light on phylogenetic relationships within this clade and on eventual recognition of subgeneric ranks.

#### The *Avonsera* clade

*Ornithogalum convallarioides* is endemic to Madagascar and is characterized by its wide, pseudopetiolate leaves, loosely racemose inflorescence (usually with two flowers per bract in the lower part), small bracts; tepals completely white and connate at the basal part, filaments tapering, connate and adnate to the perianth, capsules retuse and trilobate and seeds large and ovoid (cf. Speta, 1998a; Wetschnig *et al.*, 2007). The occurrence of two flowers per bract is an autapomorphy within *Ornithogaloideae*, though it is shared with the genus *Oziroë* Raf. (Guaglianone and Arroyo-Leuenberger, 2002), the only representative of *Oziroëoideae* (Speta, 1998a, b). The trilobate capsules have a peculiar structure with each lobe having a longitudinal central furrow (cf. Wetschnig *et al.*, 2007; fig. 3-5), much resembling the six-lobed capsules of *Ornithogalum sensu stricto*. The genus *Avonsera* was described by Speta (1998b) to group *O. convallarioides* (the type species) and *Resnova lachenalioides* (Baker) Van der Merwe, arguing that it was the only genus having a multinerved perigone in *Hyacinthoideae* (the subfamily into which it was erroneously misplaced). Molecular phylogenetic studies by Wetschnig *et al.* (2007) and Manning *et al.* (2009a) demonstrated *Avonsera* (*sensu* Speta, l.c.) to be polyphyletic. *Resnova* species were true *Hyacinthoideae*, sister to species of *Ledebouria*, whereas *A. convallarioides* nested unequivocally within *Ornithogaloideae*. Therefore, Manning *et al.* (2009a) proposed creation of subgenus *Avonsera* within *Ornithogalum*. Our phylogenetic analyses show *O. convallarioides* to be an isolated clade, probably sister to the Mediterranean species of *Ornithogalum* plus those of *Elsiea* and *O.* subgenus *Aspasia*

group *Angustifoliati* (Obermeyer, 1978), though its relationships are not fully resolved or supported. These morphological, phylogenetic and biogeographical (Malagasy endemism) characters warrant recognition of the so-far monotypic *Avonsera* as an independent genus.

#### The *Neopaterosonia* clade

Schönland (1912) described the genus *Neopaterosonia* to include *N. uitenhagensis* Schönland. Later, Lewis (1952) added *N. namaquensis* G.J.Lewis and *N. falcata* G.J.Lewis, to complete the three traditionally accepted species in the genus. As usually defined, *Neopaterosonia* is characterized by the tepals fused in a short basal tube, filaments adnate and somewhat connate at the base (autapomorphy), stigma long trilobate and somewhat reflexed, capsule lanceolate, acute, and seeds subglobose or urceolate with pitted puzzle-like or granulate testa (cf. Schönland, 1912; Lewis, 1952; Jessop, 1975). Different classifications have treated them (Table 2) as *Neopaterosonia* (Schönland, 1912; Lewis, 1952; Speta, 1998a, b), *Ornithogalum* subgenus *Neopaterosonia* (Hutchinson, 1934), *O.* subgenus *Ornithogalum* section *Neopaterosonia* (Manning *et al.*, 2009a), or as members of a widely defined *Ornithogalum* (Manning *et al.*, 2004). Speta (1998a, b) accepted *Neopaterosonia* as a member of *Hyacinthaceae*, though with doubts about its possible inclusion in *Ornithogaloideae*. Molecular studies (Manning *et al.*, 2004, 2009a) revealed a close relationship between *Neopaterosonia* and *O. rotatum*, a species first included in *O.* section *Monarchos* (Müller-Doblies and Müller-Doblies, 1996), and recently placed in *O.* section *Neopaterosonia*, according to molecular data (Manning *et al.*, 2009a). In this analysis *Neopaterosonia* plus *O. rotatum* appear as the sister group of the clade formed by the European species of *Ornithogalum* plus the African *Nicipe*. After combining the nuclear and plastid data, our phylogenetic analyses also show clear support for *Neopaterosonia* in the traditional sense, to which *O. rotatum* is sister, being both sister to other European and African clades of *ornithogaloideae*. Relationships of *O. rotatum* to *Neopaterosonia* are supported by shared floral characters (e.g. tepals connate at the base, filaments connate and adnate), and inclusion of that species into *Neopaterosonia* is therefore justified.

#### The *Elsiea* clade

Leighton and Salter (1944) described the genus *Elsiea* for peculiar plants growing in permanently wet habitats, with poorly developed and subrhizomatous bulbs, connate tepals and adnate filaments (Fig. 4C). Two species were first included in the new genus: *E. corymbosa* F.M.Leight. (currently *O. esterhuyseniae*) and *E. flanaganii* (Baker) F.M.Leight. (currently *O. paludosum* Baker). However, Obermeyer (1978) found this segregation unjustified, since she was not able to corroborate the fusion of perianth segments. Müller-Doblies and Müller-Doblies (1996) placed both taxa, together with *O. flexuosum* (Thunb.) U.Müll.-Doblies & D.Müll.-Doblies and *O. dregeanum* Kunth, in series *Flexuosa* of *O.* subgenus *Urophyllon* section *Helogalum* U.Müll.-Doblies & D.Müll.-Doblies, on the basis of the poorly developed bulbs.



However, *O. synanthifolium* F.M.Leight., which belongs to *O.* subgenus *Aspasia* group *Aspasiae*, also shows this type of bulb and also occurs in permanently wet habitats (cf. Manning *et al.*, 2007). Consequently, this bulb character appears to be a morphological convergence to that peculiar environment (cf. Manning *et al.*, 2009a), and thus it is not suitable for systematics. Our phylogenetic studies confirm this idea, since *O. esterhuyseniae* falls in an isolated position in its own clade, far away from *O. paludosum*, which is placed together with taxa of *O.* section *Linaspasia* (the *Nicipe* clade). These results agree with those presented by Manning *et al.* (2009a), who proposed *O.* subgenus *Ornithogalum* section *Elsiea* to include only *O. esterhuyseniae*, and also demonstrate that proposals by Leighton and Salter (1944) and Müller-Doblies and Müller-Doblies (1996) are not supported from a phylogenetic point of view. However, phylogenetic divergence of these groups is reasonable on the basis of morphological and biogeographical evidence. First, *O. esterhuyseniae* (= *Elsiea corymbosa*) has a corymbose inflorescence, tepals white and connate, filaments adnate, ovary obovoid and stipitate, and capsule black (cf. Obermeyer, 1978; Manning *et al.*, 2009a), and it is restricted to a small mountainous area in south-west South Africa. Secondly, *O. paludosum*, *O. flexuosum* and *O. dregeanum* have long and narrow racemose to spicate inflorescences, tepals and filaments free, ovary sessile, and capsule not black coloured (cf. Obermeyer, 1978), and occur in the eastern part of south Africa, as far north as Zambia and Malawi (cf. Obermeyer, 1978; Müller-Doblies and Müller-Doblies, 1996). The isolated phylogenetic position of *O. esterhuyseniae*, together with its characteristic syndrome of morphological features, warrants recognition of *Elsiea* as a monotypic genus.

#### The *Nicipe* clade

This clade includes *O. juncifolium* Jacq. (Fig. 4B), *O. graminifolium* Thunb., *O. gracillimum* R.E.Fr., *O. sephtonii* Hilliard & B.L.Burt. and *O. paludosum*, a group of taxa growing in eastern and southern Africa and forming a strongly supported clade. They have been recognized in the past at different ranks (Table 2), including *Nicipe* (Rafinesque, 1837), *O.* group *Angustifoliati* (Obermeyer, 1978) and *O.* section *Linaspasia*, *Vaginaspasia*, *Nanaspasia* and *Helogalum* (Müller-Doblies and Müller-Doblies, 1996). Some morphological features characterize this clade, such as bulbs mostly with membranous tunics, usually ending abruptly in an epigeous neck, occasionally surrounded by tubular, transversally banded and epigeous cataphylls; leaves usually occurring with flowers, numerous, all emerging almost at the same level from the bulb neck, often filiform with enrolled margins, rarely flat and broader or even coriaceous and boat-shaped; inflorescence racemose, cylindrical to subcorymbose; bracts small and aristate, auriculate and sometimes denticulate at the base; tepals white to yellowish on the adaxial side, and usually with a dark longitudinal band on the abaxial one, almost free to fused  $\leq$  one-third; capsule trigonous-elliptical to trilobate-turbinate, usually hidden among the dry perianth segments; and seeds variable in size and irregularly compressed (cf. Leighton, 1944, 1945; Obermeyer, 1978; Müller-Doblies and Müller-Doblies, 1996; Manning *et al.*, 2009a).

According to this evidence, we accept this group at the generic rank, with the name *Nicipe*. As here circumscribed, this genus includes several groups that are quite well characterized morphologically and have peculiar distribution patterns. Species from eastern South Africa to Kenya (*O. sephtonii* and *O. gracillimum*) produce turbinate capsules, trilobate in section, and form a clade in our combined tree. *Ornithogalum baurii* Baker and *O. diphylum* Baker share a similar fruit structure, as pointed out by Manning *et al.* (2007). Species from the western to eastern Cape (*O. graminifolium*, *O. juncifolium* and *O. paludosum*) also form a monophyletic group, and they have elliptical capsules, trigonous in section with blunt angles. Related to this group, species of *O.* series *Zebrinella*, such as *O. monophyllum* Baker, *O. anguinum* F.M.Leight. ex Oberm. and *O. zebrinellum* U.Müll.-Doblies & D.Müll.-Doblies show characteristic tubular, transversally banded cataphylls.

*Nicipe* as recognized here is mostly congruent with *O.* group *Angustifoliati* (Obermeyer, 1978), though it also includes *O. pilosum* L.f., a species Obermeyer placed in *O.* group *Hispidae*. That concept is supported by both molecular data (M. Martínez-Azorín *et al.*, unpubl. res.) and morphology, as this species lacks the typical vaginate, superposed and clearly distant leaves characterizing the latter group, as pointed out by Müller-Doblies and Müller-Doblies (1996). Although the traditional concept of *O.* group *Angustifoliati* included plants with narrow to filiform leaves, *Nicipe* as treated here includes a wide range of leaf morphology, usually associated with particular habitats. Taxa such as *O. baurii*, *O. pilosum*, *O. natalense* Baker and *O. aloiforme* Oberm. have wide, oblong-lanceolate and flat leaves, whereas others including *O. paludosum* and *O. flexuosum* have flattened to terete, somewhat succulent leaves. These species grow mostly on moist soils or high mountain environments. *Ornithogalum britteniae* F.M.Leight. ex Oberm. is an extremely rare plant with evergreen, distichous, coriaceous, boat-shaped leaves with fimbriate margins resembling those of some *Gasteria* Duval, which grows in grassy karroid dwarf shrubland (Dold, 2003). Another group of species (*O. annae-ameliae* U.Müll.-Doblies & D.Müll.-Doblies, *O. campanulatum* U.Müll.-Doblies & D.Müll.-Doblies, *O. synadelphicum* U.Müll.-Doblies & D.Müll.-Doblies and *O. verae* U.Müll.-Doblies & D.Müll.-Doblies) have peculiar floral features, such as tepals fused, and filaments adnate to perigone and/or connate into a short tube. Connation of perigone segments is a plesiomorphy which has evolved several times in different genera of the subfamily (Fig. 3C), including *Pseudogaltonia*, *Dipcadi*, *Battandiera*, *Galtonia*, *Avonsera*, *Neopaterosonia* and *Elsiea*. Furthermore, *Battandiera* and *Galtonia* include species with either connate or almost free tepals, as in *Nicipe*.

From a phylogenetic point of view, *Nicipe* is sister to the rest of Eurasian genera of *Ornithogaloideae*, and it could constitute the link with the lineages from southern Africa (cf. Manning *et al.*, 2009a), where the origin of this genus would be placed (Feinbrun, 1941). Furthermore, the Kenyan species *O. gracillimum* provides evidence for this (Fig. 2). Migrations across East Africa would have connected floristic regions of both hemispheres in two different ways. On the one hand, the ‘arid corridor’ or ‘arid track’ migration



hypothesis (cf. Verdcourt, 1969; Thulin, 1994; Jürgens, 1997; Linder *et al.*, 2005; Hoyo and Pedrola-Monfort, 2006) and, on the other, the high-altitude corridor (cf. Linder *et al.*, 2005; Devos *et al.*, 2009), which jointly would have favoured disjunctions in genera such as *Colchicum* L. (including *Androcymbium* Willd.), *Euryops* (Cass.) Cass., *Delosperma* N.E.Br., *Matthiola* W.T.Aiton, *Albuca*, *Battandiera*, *Dipcadi*, *Stellarioides* and *Nicipe* itself.

#### The *Cathissa* clade

The Mediterranean species traditionally placed in *O.* subgenus *Cathissa* (*O. concinnum* Salisb., *O. broteroi* M.Laínz and *O. reverchonii* Lange ex Willk.) are characterized by their

leaves glabrous, lanceolate to tapering; tepals white and ovoid or obovoid; filaments lanceolate to tapering; capsule ovoid to elliptical; and seeds irregularly flattened with papillate or puzzle-like testa (Figs 5A–C and 6A–C) (cf. Zahariadi, 1980; Pastor, 1987; Moret *et al.*, 1990; Martínez-Azorín *et al.*, 2006, 2007). These species were placed in *Cathissa* (Salisbury, 1866; Speta, 1998a, b, 2001), a group treated as a genus, subgenus or section (Table 2). Our phylogenetic results confirm the monophyly of this group of three currently accepted taxa (Martínez-Azorín *et al.*, 2007), which are well characterized morphologically and are restricted to the western part of the Iberian Peninsula and western Morocco. Acceptance of *Cathissa* at the generic rank is thus justified.

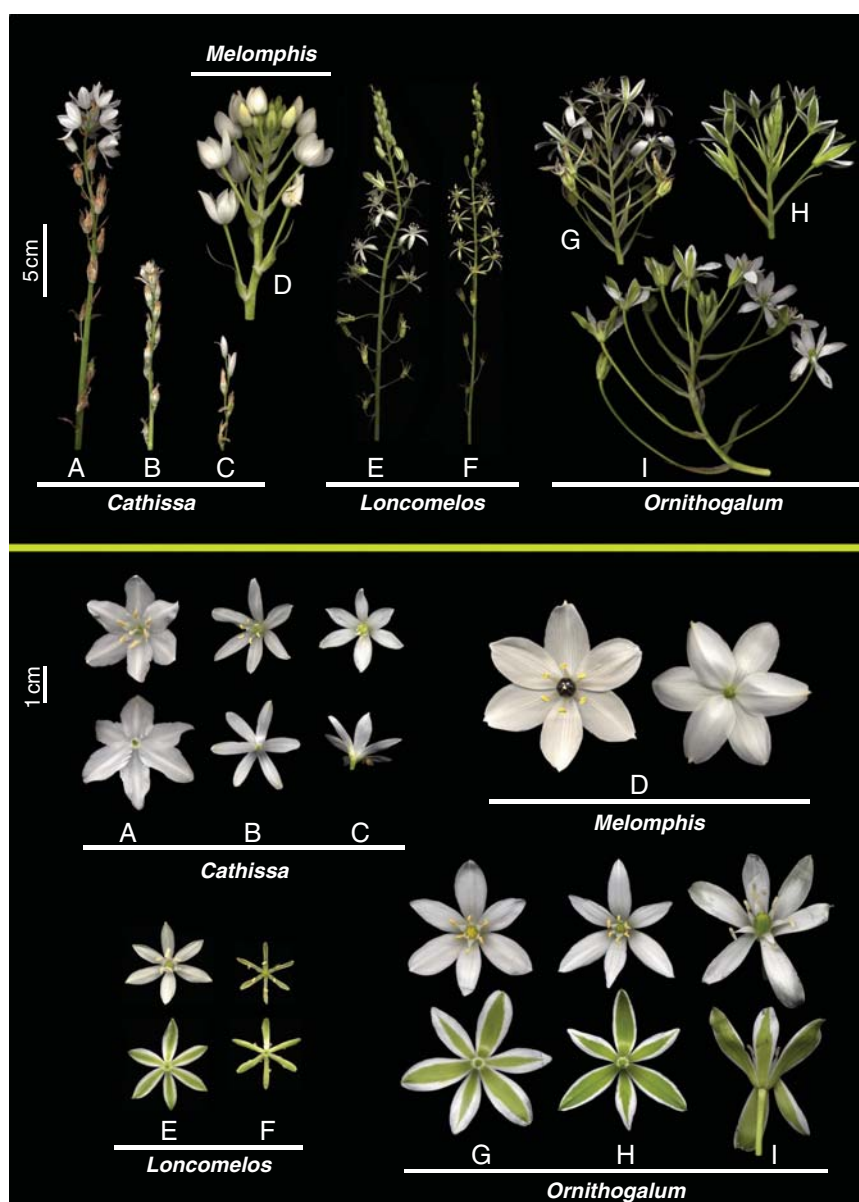

FIG. 5. Inflorescence and flower features of most of the Eurasian genera of *Ornithogaloideae*: (A) *Cathissa reverchonii*; (B) *C. concinna*; (C) *C. unifolia*; (D) *Melomphis arabica*; (E) *Loncomelos narbonense*; (F) *L. pyrenaicus*; (G) *Ornithogalum baeticum*; (H) *O. bourgaeaenum*; (I) *O. divergens*.

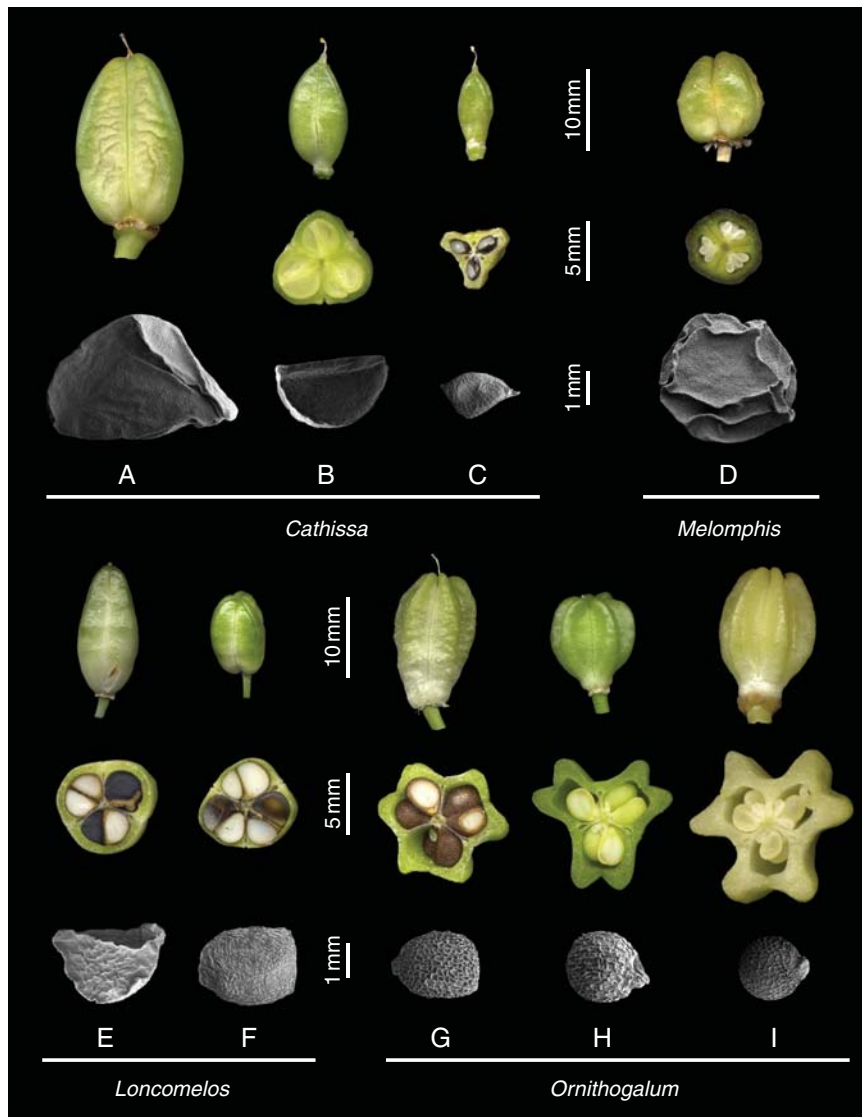

FIG. 6. Capsule (lateral and section views) and seed features of most of the Eurasian genera of Ornithogaloideae: (A) *Cathissa reverchonii*; (B) *C. concinna*; (C) *C. unifolia*; (D) *Melomphis arabica*; (E) *Loncomelos narbonense*; (F) *L. pyrenaicus*; (G) *Ornithogalum baeticum*; (H) *O. bourgaeianum*; (I) *O. divergens*.

#### The *Melomphis* clade

In our phylogenetic analyses, *O. arabicum*, traditionally included in *Melomphis* (Rafinesque, 1837; Garbari *et al.*, 2008), *Caruelia* Parl. (Parlatore, 1854), *O.* subgenus *Caruelia* (Parl.) Baker (Baker, 1872) or *Myanthe* Salisb. (Salisbury, 1866), appears as an independent clade, the position of which is not fully resolved as previously demonstrated by Manning *et al.* (2009a). *Melomphis* species are distributed in the Mediterranean basin eastwards, and are characterized by the corymbose to pseudocorymbose inflorescence, globose and shining black ovary, plain white tepals, globose and truncate to retuse capsule and irregularly compressed seeds with granulate testa (Figs 5D and 6D). Some authors have recently accepted the independence of this genus (Garbari *et al.*, 2008). Although a wider sampling is needed to clarify relationships to other ornithogaloid clades, notable morphological differences exist to justify segregation of *Melomphis* at the generic rank. The globose and

shining ovary of these species is similar to that occurring in the South African *O. saundersiae* (cf. Baker, 1891), here treated as *Galtonia*. Therefore, it can be interpreted as a morphological convergence between these groups, which are distant from each other in the phylogenetic analyses. Morphological features exist which allow easy differentiation of these groups, including tepals fleshy, reflexed and persistent for a long time in fruit, and capsule acute and ovate in *O. saundersiae*.

#### The *Loncomelos* clade

The species traditionally included in *O.* subgenus *Beryllis* are characterized by their concolourous leaves long and tapering; inflorescence racemose, much longer than wide; tepals white or rarely yellowish with a green longitudinal band on the abaxial side; filament expanded in the lower half; capsule trigonous with obtuse angles, ovate-lanceolate; and

seeds biseriate, horizontally disposed and irregularly compressed, with papillate, rugose testa (Figs 5E and F and 6E and F) (cf. Baker, 1872; Zahariadi, 1980; Cullen, 1984; Wittmann, 1985; Feinbrun, 1986; Pastor, 1987; Moret *et al.*, 1990; Rechinger, 1990; Speta, 1998a; Martínez-Azorín *et al.*, 2010a). These plants have been placed in different taxa (Table 2), including the genus *Loncomelos* (Rafinesque, 1837). Our phylogenetic results support the monophyly of this group of plants. *Ornithogalum narbonense* L. and *O. pyrenaicum* L. form a strongly supported clade sister to *Ornithogalum sensu stricto* plus *Honorius*, which is clearly differentiated by the morphology of inflorescences, capsules and seeds. The inclusion of *Loncomelos* in the synonymy of *Ornithogalum* section *Ornithogalum*, as proposed by Manning *et al.* (2009a), generates a highly heterogeneous group mixing different capsule and seed morphology, characters that have been treated as highly informative phylogenetically. Therefore, we adopt the generic rank for *Loncomelos*, following the concept of Wittmann (1985) and Speta (1998a), on the basis of clear morphological and phylogenetic evidence. Similarly, segregation of *Loncomelos* has been accepted increasingly in recent times (cf. Speta, 1998a, b, 2000, 2006; Spies, 2004; Peruzzi *et al.*, 2007; Ravenna, 2007; Garbari *et al.*, 2008).

Maire (1958) included the north African *O. sessiliflorum* in *O.* subgenus *Beryllis*, mainly on the basis of its long and narrow inflorescence, whereas Stedje (2001b) connected it to *Cathissa*. However, this species shows other evident differences with regard to the rest of the Eurasian and north African taxa of both cited groups, such as the flowers with a green band visible on both sides of tepals, the subglobose capsule, and the compressed seeds obliquely stalked in each locule and with puzzle-like testa (Fig. 4M and O). All those features strongly connect it to *Stellarioides*, which led Speta (2001) to establish the combination *S. sessiliflora* (Desf.) Speta. The exclusion of *O. sessiliflorum* from *O.* subgenus *Beryllis* (= *Loncomelos*) gives homogeneity to the latter as regards to testa morphology (only granulate or rugose, never puzzle-like as reported by Moret *et al.*, 1990).

#### The *Honorius* clade

*Ornithogalum nutans* L. is characterized by the racemose inflorescence; filaments tapering, with two apical lobes overtopping the anther; the capsule nodding at maturity (autapomorphy) and with six weak ribs in section and globose seeds with prominently reticulate testa (Fig. 4A) (cf. Baker, 1872; Zahariadi, 1980; Uysal *et al.*, 2005). Due to these features, it was segregated at different ranks (Table 2), of which *Honorius* (Gray, 1821) has priority at the generic rank. Our phylogenetic results place *O. nutans* as sister to the *Ornithogalum sensu stricto* clade. Phylogenetic and morphological evidence justifies its segregation at the generic rank, as accepted by some recent authors (cf. Holub, 1976; Speta, 2000; Garbari *et al.*, 2008). The recently described *O. chetikianum* Uysal, Ertuğrul & Dural, a Turkish taxon close to *O. nutans*, is said to have leaves with a longitudinal greyish band, which connects it to many representatives of *Ornithogalum sensu stricto*. A wider sampling of related taxa

from Anatolia and the Middle East is still needed to improve our knowledge of phylogenetic relationships within *Honorius*.

#### The *Ornithogalum* clade

The final clade corresponds to *Ornithogalum sensu stricto*, which includes Eurasian and North African species well characterized by their long linear to oblong-lanceolate leaves, sometimes with a white longitudinal band on the adaxial side; inflorescence corymbose or pseudocorymbose; tepals white with a longitudinal green band only visible on the abaxial side; capsule obovate or oblong, truncate with six evident ribs in section; and seeds globose with prominently reticulate testa (Figs 5G–I and 6G–I) (cf. Baker, 1872; Cullen, 1984; Feinbrun, 1986; Moret *et al.*, 1990; Rechinger, 1990; Speta, 1998a; Martínez-Azorín *et al.*, 2009, 2010b). The white longitudinal band is due to an interruption of palisade tissue in the central portion of the leaf (cf. Peruzzi *et al.*, 2007), being an apomorphy absent in the early diverging lineages of the present clade. This character is also present in a few species of *Albuca*.

Species in this clade represent the typical, strict concept of *Ornithogalum*, which includes its type, *O. umbellatum* L. (cf. Stearn, 1983). Baker (1872) grouped them into *O.* subgenus *Heliochamos*, which was reduced later to *O.* section *Heliochamos* by Engler (1888), and which Zahariadi (1965, 1980) divided in eight subgenera (cf. Cullen and Ratter, 1967) on the basis of features such as the type of seed germination (hypogean vs. epigeal), concrescence and consistence of bulb scales, presence or absence of central band on the leaves, inflorescence structure, position of fruting pedicels, capsule shape, etc. However, our sampling is insufficient and does not cover some of those subgenera; thus further studies are necessary to evaluate their monophyly and significance. In our phylogenetic studies, all sampled taxa of this group form a clade, strongly supported in the Bayesian analysis. Furthermore, this clade is relatively derived in the subfamily, a fact that could explain the large number of species and the scant morphological differentiation among these, probably due to recent speciation.

## TAXONOMIC PROPOSAL

On the basis of the evidence presented above, 19 phylogenetically monophyletic groups are accepted (Table 3) and are treated here as independent genera since they are supported by syndromes of morphological characters. No new taxa need to be described to accommodate these monophyletic groups at generic rank (cf. Manning *et al.*, 2009a). All genera accepted here are already described and most have been used increasingly in recent times (cf. Holub, 1976; Speta, 1998a, b, 2000, 2001, 2006; Spies, 2004; Peruzzi *et al.*, 2007; Ravenna, 2007; Garbari *et al.*, 2008). They are well characterized morphologically, and are here circumscribed in such a way that allows easy definition and makes easier subsequent attribution of a taxon to a given genus. Similarly, most of combinations required are available, with the exception of those affecting the newly accepted or resurrected genera, given below.

TABLE 3. *Key for identification of taxa in Ornithogaloideae*

|      |                                                                                                                                                                                                                                                                                                                   |                                  |
|------|-------------------------------------------------------------------------------------------------------------------------------------------------------------------------------------------------------------------------------------------------------------------------------------------------------------------|----------------------------------|
| 1a.  | Floral bract with small bracteoles. Tepals all fused over two-thirds of their length, into a cylindrical tube, slightly swollen at the base and somewhat curved; filaments inserted at the mouth of the tube                                                                                                      | <b>1. <i>Pseudogaltonia</i></b>  |
| 1b.  | Floral bract without bracteoles (if present, then leaves narrowed in a pseudopetiole). Tepals free or fused into a shorter, campanulate to cylindrical, straight tube; filaments free, connate or adnate to the tube                                                                                              | 2                                |
| 2a.  | Tepals with a broad and dark longitudinal band – green to brownish, evident on both sides and usually associated with three to many aggregated medial nerves                                                                                                                                                      | 3                                |
| 2b.  | Tepals concolour, exceptionally with dark maculae at the base or apex, or sometimes with a broad longitudinal coloured band, only visible on the abaxial side, not well defined along the medial nerve                                                                                                            | 8                                |
| 3a.  | Ovary with two prominent dorsal keels on each carpel. Plants with only one leaf (exceptionally up to three), usually flat on the ground                                                                                                                                                                           | <b>4. <i>Trimelopter</i></b>     |
| 3b.  | Ovary without such prominent dorsal keel. Plants usually with numerous leaves, erect or spreading (exceptionally solitary, varying in morphology)                                                                                                                                                                 | 4                                |
| 4a.  | Seed obliquely stalked in each locule. Inflorescence usually subspiciform, dense, and many flowered                                                                                                                                                                                                               | <b>7. <i>Stellarioides</i></b>   |
| 4b.  | Seed horizontally stalked in each locule. Inflorescence usually racemose to subcorymbose, lax, with long pedicellate flowers                                                                                                                                                                                      | 5                                |
| 5a.  | Capsule widely quadrate in outline, deeply three lobed; seeds uniseriate in each locule                                                                                                                                                                                                                           | 6                                |
| 5b.  | Capsule ovate, oblong or obovate in outline, trigonous to trilobate; seeds biseriate in each locule (exceptionally uniseriate)                                                                                                                                                                                    | 7                                |
| 6a.  | Inflorescence subspicate, mostly secund, with shortly pedicellate flowers. Outer tepals curved outwards, inners long connivent to form a cylindrical tube with reflexed tips                                                                                                                                      | <b>2. <i>Dipcadi</i></b>         |
| 6b.  | Inflorescence racemose, cylindrical, conical or subpyramidal, with long pedicellate flowers. Tepals all similar and spreading                                                                                                                                                                                     | <b>3. <i>Battandiera</i></b>     |
| 7a.  | Tepals usually dimorphic: the outers mucronate and the inners cucullate or with an inflexed flap at the apex; filaments usually with basal constrictions; ovary with paraseptal keels; style trigonous in section, prismatic to obtriangular or sometimes thin or tapering; stigma not capitate, usually trilobed | <b>5. <i>Albuca</i></b>          |
| 7b.  | Tepals monomorphic, all similar; filaments without basal constrictions; ovary without paraseptal keels; style circular in section, subcylindric, usually deflexed; stigma capitate                                                                                                                                | <b>6. <i>Coilonox</i></b>        |
| 8a.  | Tepals fused at the base                                                                                                                                                                                                                                                                                          | 9                                |
| 8b.  | Tepals completely free at the base                                                                                                                                                                                                                                                                                | 12                               |
| 9a.  | Flowers nodding. Tepals fused into a long campanulate tube of approx. half of their length. Stamens hidden among the perianth lobes                                                                                                                                                                               | <b>8. <i>Galtonia</i></b>        |
| 9b.  | Flowers patent to erect-patent. Tepals fused into a tube $\leq$ one-third of their length. Stamens clearly visible                                                                                                                                                                                                | 10                               |
| 10a. | Leaves tapering at the base and pseudopetiolate; inflorescence usually with two flowers per bract in the lower part; bracteoles present in the upper flowers; capsule retuse or truncate at the apex                                                                                                              | <b>11. <i>Avonsera</i></b>       |
| 10b. | Leaves sheathing at the base, never pseudopetiolate; inflorescence always with one flower per bract; bracteoles absent; capsule acute to subacute at the apex                                                                                                                                                     | 11                               |
| 11a. | Tepals $\leq$ half the length of capsule; seeds piriform or subglobose; filaments of stamen connate                                                                                                                                                                                                               | <b>12. <i>Neopaterosonia</i></b> |
| 11b. | Tepals longer than capsule or rarely slightly shorter; seeds angular, irregularly compressed; filaments of stamen free to adnate, exceptionally connate                                                                                                                                                           | <b>14. <i>Nicipe</i></b>         |
| 12a. | Ovary globose, shining black. Inflorescence subcorymbose                                                                                                                                                                                                                                                          | 13                               |
| 12b. | Ovary fusiform to oblong, green or yellow. Inflorescence racemose to corymbose                                                                                                                                                                                                                                    | 14                               |
| 13a. | Capsule ovate, with acute apex. Tepals fleshy, long persistent and reflexed in young fruits                                                                                                                                                                                                                       | <b>8. <i>Galtonia</i></b>        |
| 13b. | Capsule subglobose, with truncate apex. Tepals not fleshy, withering soon and never reflexed in fruit                                                                                                                                                                                                             | <b>16. <i>Melomphis</i></b>      |
| 14a. | Tepals bearing a wide longitudinal band, green, pinkish or brownish, along the medial nerve, only visible on the abaxial side                                                                                                                                                                                     | 15                               |
| 14b. | Tepals concolour, without a longitudinal coloured band on the abaxial side, sometimes with maculae at the base or apex                                                                                                                                                                                            | 19                               |
| 15a. | Capsule with six evident ribs in section. Seeds globose, with reticulate testa                                                                                                                                                                                                                                    | 16                               |
| 15b. | Capsule trigonous or trilobate in section. Seeds irregularly compressed, with papillate to echinulate or puzzle-like testa                                                                                                                                                                                        | 17                               |
| 16a. | Inflorescence corymbose to racemose, with basal pedicels $>1$ cm. Flowers stellate at the anthesis, erect to erect-patent; filaments lanceolate to tapering, attenuate at the apex                                                                                                                                | <b>19. <i>Ornithogalum</i></b>   |
| 16b. | Inflorescence racemose, with basal pedicels $\leq 1$ cm long. Flowers campanulate at the anthesis, erect to slightly nodding; filaments tapering, at least the inner ones with two evident lobes or teeth accompanying the anther                                                                                 | <b>18. <i>Honorius</i></b>       |
| 17a. | Plants tall, $\leq 140$ cm. Leaves glabrous, not sheathing the stem by a tubular cataphyll; inflorescence (excluding the stem) $\leq 50$ cm long; capsule not hidden by the withered perianth                                                                                                                     | <b>17. <i>Loncomelos</i></b>     |
| 17b. | Plants small to middle size, $\leq 50$ cm. Leaves usually ciliate or hirsute, sheathing the stem by a tubular cataphyll; inflorescences shorter; capsule usually hidden by the withered perianth                                                                                                                  | 18                               |
| 18a. | Leaves commonly not occurring with the flowers, sheathing and ascending upon the stem, being the limbs patent and usually arranged at different heights. Seeds mostly apiculate (comma-shaped), usually tuberculate or long papilose                                                                              | <b>10. <i>Eliokarmos</i></b>     |
| 18b. | Leaves usually occurring with the flowers, all emerging almost at the same level and disposed mostly on an epigeous neck. Seeds many angled, smooth                                                                                                                                                               | <b>14. <i>Nicipe</i></b>         |

Continued



TABLE 3. *Continued*

|      |                                                                                                                                                                                                                                                                                                                            |                       |
|------|----------------------------------------------------------------------------------------------------------------------------------------------------------------------------------------------------------------------------------------------------------------------------------------------------------------------------|-----------------------|
| 19a. | Flowers greenish. Filaments petaloid, showy, pure white, and spreading. Capsule obcordate or widely globose and truncate to retuse at the apex, equal or wider than long                                                                                                                                                   | 9. <i>Ethesia</i>     |
| 19b. | Flowers white, yellow or orange. Filaments neither clearly spreading nor showy. Capsule elliptical, longer than wide                                                                                                                                                                                                       | 20                    |
| 20a. | Tepals white, yellow, orange or reddish, usually with evident dark maculae at their base or apex; leaves usually ciliate or fimbriate on the edge, or pilose on the blade, rarely glabrous; filaments subulate or lanceolate and flat, usually with quadrate basal expansions or with two erect lobes concealing the ovary | 10. <i>Eliokarmos</i> |
| 20b. | Tepals always white, not maculate; leaves glabrous; filaments flat, lanceolate to tapering, without abrupt basal expansions                                                                                                                                                                                                | 21                    |
| 21a. | Plants with scarcely developed bulbs, subrhizomatous. Inflorescence corymbose. Ovary stipitate. Capsule black                                                                                                                                                                                                              | 13. <i>Elsiea</i>     |
| 21b. | Plants with swollen, well-developed bulb. Inflorescence racemose to spiciform. Ovary not stipitate. Capsule pale brown                                                                                                                                                                                                     | 15. <i>Cathissa</i>   |

1. *Pseudogaltonia* Kuntze in Jahrb. Königl. Bot. Gart. Berlin 4: 274. 1886 [nom. alternat.] = *Hyacinthus* section *Pseudogaltonia* Kuntze in Jahrb. Königl. Bot. Gart. Berlin 4: 274. 1886 [nom. alternat.] – Holotype: *P. pechuelii* Kuntze = *Hyacinthus pechuelii* Kuntze = *P. clavata* (Mast.) E. Phillips = *Galtonia clavata* Mast.

= *Lindneria* T. Durand & Lubbers in Bull. Soc. Bot. France 36: CCXVII. 1890 – Holotype: *L. fibrillosa* T. Durand & Lubbers = *P. clavata* (Mast.) E. Phillips

Plants large. Bulb large, with outer tunics cartilaginous and fibrous. Leaves widely lanceolate, flat, long, acute, glabrous. Inflorescence in a loose pyramidal raceme; bracts linear-acuminate; bracteoles (prophylls) present. Tepals white with greenish or greyish longitudinal band, fused over two-thirds of their length, into a tube approx. 3 cm long, slightly swollen at the base and somewhat curved; filaments exerted, flat, insert at the mouth of the tube; style filiform and long (>2 cm). Capsule quadrate, truncate, and deeply trilobate. Seeds flat, disciform and uniseriate in each locule, with five to seven angled polygonal subsodiametric testa cells with shallow depressions and pitted surface.

*Chromosome number*:  $2n = 18$  (cf. Speta, 1998a; Forrest and Jong, 2004).

*Number of species*: 2 (cf. Manning et al., 2009b).

*Distribution*: north-western South Africa, Namibia and Botswana.

2. *Dipcadi* Medik. in Hist. & Commentat. Acad. Elect. Sci. Theod.-Palat. 6: 431. 1790 – Holotype: *D. serotinum* (L.) Medik. = *Hyacinthus serotinus* L.

= *Zuccagnia* Thunb., Nov. Gen. Pl. 9: 127. 1798. – Type: *Z. viridis* (L.) Thunb. = *D. viride* (L.) Moench.

= *Uropetalon* Burch. ex Ker Gawl. in Bot. Reg. 2: t. 156. 1816 = *D. ser. Uropetalon* (Burch. ex Ker Gawl.) J.C. Manning & Goldblatt in Taxon 58(1): 99. 2009 – Type: *U. glaucum* Burch. ex Ker Gawl. in Bot. Reg. 2: t. 156. 1816 = *D. glaucum* (Burch. ex Kew Gawl.) Baker

= *Polemanna* K. Bergius ex Schltld. in Linnaea 1: 250. 1826, nom. rej. [non *Polemanna* Eckl. & Zeyh. in Enum. Pl. Afric. Austral. 3: 347. 1837, nom. cons. (*Umbelliferae*)] – Type: *P. hyacinthiflora* Berg. ex Schltld. = *D. brevifolium* (Thunb.) Fourc.

= *Tricharis* Salisb., Gen. Pl. [Salisbury]: 24. 1866 – Type: *T. serotina* (L.) Salisb. = *D. serotinum* (L.) Medik.

Plants small to middle size. Leaves variable, usually linear, flattened or canaliculate, or more or less twisted, glabrous to

hirsute. Inflorescence racemose or subspiciform, usually secund, with patent or nodding flowers; bracts ovate or attenuate, membranous; bracteoles absent. Tepals lanceolate-tapering, fused at the base into a tube approx. one-quarter to one-third (to two-thirds) of their length; inner ones suberect or connivent and reflexed at the apical third; outer ones reflexed, sometimes with filiform caudate appendices; filaments short, linear to flatish, adnate to the tube and included. Capsule deeply 3-lobed, quadrate in outline, truncate at the apex, rarely umbonate, sometimes stipitate. Seeds black, discoid, flat, horizontally stacked and uniseriate per locule, with 5–6 angled polygonal subsodiametric or up to twice as long as broad testa cells with shallow depressions and smooth or pitted surface.

*Chromosome number*:  $2n = 8, 12, 18, 20, 24, 36, 64$  (cf. Speta, 1998a, Jones and Smith, 1967).

*Number of species*: approx. 30 (cf. Obermeyer, 1964; Speta, 1998a; Manning et al., 2002, 2009a).

*Distribution*: south, east and north Africa, Socotra, Madagascar, Europe, Middle East and India.

3. *Battandiera* Maire in Bull. Soc. Hist. Nat. Afr. Nord 17(3): 125. 1926 = *Ornithogalum* section *Trineuron* Batt. in Bull. Soc. Bot. France 63: 195. 1919 – Holotype: *B. amoena* (Batt.) Maire = *O. amoenum* Batt.

= *Ornithogalum* section *Namibiogalum* U.Müll.-Doblies & D.Müll.-Doblies in Feddes Repert. 107(5–6): 487. 1996 [basion.] = *Albuca* subgenus *Namibiogalum* (U.Müll.-Doblies & D.Müll.-Doblies) J.C.Manning & Goldblatt in Taxon 58(1): 92. 2009 – Holotype: *B. rautanenii* (Schinz) Mart.-Azorín, M.B.Crespo & Juan = *O. rautanenii* Schinz.

Plants usually middle size. Bulb ovoid, often with an evident neck at the apex with transverse thin darker nerves; outer tunics numerous, coriaceous, coarse and greyish, protecting the bulb. Leaves usually narrowly lanceolate to filiform, flat to folded, glabrous and somewhat glaucous and sometimes with darker spots at the base beneath; bracteoles absent. Inflorescence conical to subpyramidal, elongating with age, sometimes with a plumose or pendulous apex; bracts membranous, deltoid to filiform, usually longer than flowers. Tepals white or greenish, oblong, linear, obtuse, spreading or rarely reflexed, with a green or brownish longitudinal band visible on both sides (rarely the band indistinct but with darker medial aggregated nerves evident when dried), free or shortly fused into a tube  $\leq 5$  mm long; filaments linear-acuminate or ovate-acuminate, sometimes with quadrate basal expansions or shortly adnate to the perianth; ovary ovoid or oblong-globose, trigonous or trilobate, sometimes

stipitate or expanded at the base into a 6-lobed disc. Capsule deeply trilobate with narrow lobes, often widely quadrate in outline, wider than long, truncate at the apex or emarginate, with darker transversal nerves. Seeds large, discoid, flat, horizontally stacked and uniseriate in each locule, with angled and polygonal or slightly undulate testa cells.

*Chromosome number*:  $2n = 20, 24$  (cf. Speta, 2001; Vosa, 1980).

*Number of species*: 8 (according to the present study).

*Distribution*: arid regions of southern and East Africa (excepting the southern half of South Africa), with a disjoint species in North Africa (*B. amoena*).

*Necessary combinations*:

*Battandiera candida* (Oberm.) Mart.-Azorín, M.B.Crespo & Juan, **comb. nov.** = *Ornithogalum candidum* Oberm. in *Bothalia* 10: 355. 1971 [basion.]

*Battandiera donaldsonii* (Rendle) Mart.-Azorín, M.B.Crespo & Juan, **comb. nov.** = *Albuca donaldsonii* Rendle in *J. Bot.* 34: 131. 1896 [basion.] = *O. donaldsonii* (Rendle) Greenway in *Journ. E. Afr. Nat. Hist. Soc.* 27: 203. 1969

*Battandiera pulchra* (Schinz) Mart.-Azorín, M.B.Crespo & Juan, **comb. nov.** = *Ornithogalum pulchrum* Schinz in *Verh. Bot. Ver. Brandenb.* 31: 221. 1890 [basion.]

*Battandiera rautanenii* (Schinz) Mart.-Azorín, M.B.Crespo & Juan, **comb. nov.** = *Ornithogalum rautanenii* Schinz in *Verh. Bot. Ver. Brandenb.* 31: 221. 1890 [basion.]

*Battandiera seineri* (Engl. & K.Krause) Mart.-Azorín, M.B.Crespo & Juan, **comb. nov.** = *Bulbine seineri* Engl. & K.Krause in *Bot. Jahrb.* 45: 124. 1910 [basion.]

*Battandiera stapffii* (Schinz) Mart.-Azorín, M.B.Crespo & Juan, **comb. nov.** = *Ornithogalum stapffii* Schinz in *Bull. Herb. Boiss.* 4, App. 3: 42. 1896 [basion.]

*Battandiera tubiformis* (Oberm.) Mart.-Azorín, M.B.Crespo & Juan, **comb. nov.** = *Ornithogalum candidum* var. *tubiforme* Oberm. in *Bothalia* 10: 357. 1971 [basion.]

4. *Trimelopter* Raf., *Fl. Tellur.* 2: 24. 1837 = *Ardernia* Salisb., *Gen. Pl.*: 35. 1866 = *Ornithogalum* section *Monarchos* U.Müll.-Doblies & D.Müll.-Doblies in *Feddes Repert.* 107(5–6): 470. 1996 = *Albuca* subgenus *Monarchos* (U.Müll.-Doblies & D.Müll.-Doblies) J.C.Manning & Goldblatt in *Taxon* 58(1): 92. 2009 – Holotype: *T. fuscatum* (Jacq.) Raf. = *O. fuscatum* Jacq. = *T. unifolium* (Retz.) Mart.-Azorín, M.B.Crespo & Juan = *O. unifolium* Retz.

Plants small to middle size. Bulb ovate, outer tunics membranous or coriaceous, greyish, usually with a long neck. Leaf one (rarely  $\leq 3$  in cultivation), ovate to elliptical or narrowly oblong, with obtuse to acute apex, glabrous or diversely pubescent, occurring with flowers or withering at flowering time, sheathing into a contracted tubular base, and firm blade, usually appressed to the ground or spreading; bracteoles absent. Inflorescence racemose or pyramidal; bracts deltoid, aristate, auriculate, sometimes with papillate adaxial side and edges. Tepals pale yellow, brownish or whitish, with a central greenish or brownish band visible on both sides (sometimes indistinct on the adaxial side, though associated to evident medial nerves); filaments narrowly ovate, expanded below; ovary ovoid or obovoid, trilobate with three prominent carpels, each one with two longitudinal keels down the back and a groove between. Capsule globose, small ( $\leq 4$  mm),

trilobate, with two prominent keels on each carpel. Seeds flat, semidiscoid, or irregularly compressed, with a straight side and the other curved, with double ridge, and subpolygonal, granulate testa.

*Chromosome number*: no data available.

*Number of species*: approx. 10 (according to the present study).

*Distribution*: mainly in southern Namibia and western South Africa, spreading to central and north-eastern South Africa.

*Necessary combinations*:

*Trimelopter costatum* (U.Müll.-Doblies & D.Müll.-Doblies) Mart.-Azorín, M.B.Crespo & Juan, **comb. nov.** = *Ornithogalum costatum* U.Müll.-Doblies & D.Müll.-Doblies in *Feddes Repert.* 107(5–6): 482. 1996 [basion.]

*Trimelopter etesiogariense* (U.Müll.-Doblies & D.Müll.-Doblies) Mart.-Azorín, M.B.Crespo & Juan, **comb. nov.** = *Ornithogalum etesiogariense* U.Müll.-Doblies & D.Müll.-Doblies in *Feddes Repert.* 107(5–6): 476. 1996 [basion.]

*Trimelopter etesiogariense* subsp. *longipilosum* (U.Müll.-Doblies & D.Müll.-Doblies) Mart.-Azorín, M.B.Crespo & Juan, **comb. nov.** = *Ornithogalum etesiogariense* subsp. *longipilosum* U.Müll.-Doblies & D.Müll.-Doblies in *Feddes Repert.* 107(5–6): 478. 1996 [basion.]

*Trimelopter dyeri* (Poelln.) Mart.-Azorín, M.B.Crespo & Juan, **comb. nov.** = *Ornithogalum dyeri* Poelln. in *Ber. Deutsch. Bot. Ges.* 61: 209. 1944 [basion.]

*Trimelopter monarchos* (U.Müll.-Doblies & D.Müll.-Doblies) Mart.-Azorín, M.B.Crespo & Juan, **comb. nov.** = *Ornithogalum monarchos* U.Müll.-Doblies & D.Müll.-Doblies in *Feddes Repert.* 107(5–6): 476. 1996 [basion.]

*Trimelopter ovatum* (Thunb.) Mart.-Azorín, M.B.Crespo & Juan, **comb. nov.** = *Ornithogalum ovatum* Thunb., *Prodr.* 62. 1794 [basion.]

*Trimelopter ovatum* subsp. *oliverorum* (U.Müll.-Doblies & D.Müll.-Doblies) Mart.-Azorín, M.B.Crespo & Juan, **comb. nov.** = *Ornithogalum ovatum* subsp. *oliverorum* U.Müll.-Doblies & D.Müll.-Doblies in *Feddes Repert.* 107(5–6): 474. 1996 [basion.]

*Trimelopter pendulinum* (U.Müll.-Doblies & D.Müll.-Doblies) Mart.-Azorín, M.B.Crespo & Juan, **comb. nov.** = *Ornithogalum pendulinum* U.Müll.-Doblies & D.Müll.-Doblies in *Feddes Repert.* 107(5–6): 480. 1996 [basion.]

*Trimelopter psammophorum* (U.Müll.-Doblies & D.Müll.-Doblies) Mart.-Azorín, M.B.Crespo & Juan, **comb. nov.** = *Ornithogalum psammophorum* U.Müll.-Doblies & D.Müll.-Doblies in *Feddes Repert.* 107(5–6): 482. 1996 [basion.]

*Trimelopter strigosum* (U.Müll.-Doblies & D.Müll.-Doblies) Mart.-Azorín, M.B.Crespo & Juan, **comb. nov.** = *Ornithogalum strigosum* U.Müll.-Doblies & D.Müll.-Doblies in *Feddes Repert.* 107(5–6): 480. 1996 [basion.]

*Trimelopter unifolium* (Retz.) Mart.-Azorín, M.B.Crespo & Juan, **comb. nov.** = *Ornithogalum unifolium* Retz., *Obs.* 2: 17. 1781 [basion.] = *T. fuscatum* (Jacq.) Raf. = *O. fuscatum* Jacq.

*Trimelopter watermeyerii* (L.Bolus) Mart.-Azorín, M.B.Crespo & Juan, **comb. nov.** = *Ornithogalum watermeyerii* L.Bolus in *S. African Gard.* 21: 13. 1931 [basion.]

5. *Albuca* L., *Sp. Pl.*, ed. 2. 1: 438. 1762 – Lectotype: *Albuca canadensis* (L.) F.M. Leight. [= *Ornithogalum canadense* L. = *A. major* L., *nom. illeg.*]

Plants mostly middle to large size. Bulb hypogeous or epigeous, diverse in size; outer tunics membranous, coriaceous, fibrous or fleshy and green. Leaves variable, usually narrowly lanceolate to filiform, flattened to folded or inrolled, glabrous, hirsute or glandular, sometimes spirally twisted or coiled, and exceptionally with a longitudinal white band. Inflorescence racemose or subcorymbose, glabrous, papillose or glandular; bracteoles absent. Flowers nodding, patent or erect; tepals white to yellow with a broad central greenish to brownish band visible on both sides, whorls dimorphic: the outer ones mucronate, suberect or spreading, and the inner ones cucullate, hooked or with an inflexed flap at the apex, erect and more or less connivent and hiding the stamens and the style; filaments narrowly oblong or linear-lanceolate, more or less expanded at the base, with a constriction or folded basally, sometimes at least the outers with anthers smaller or absent; ovary ovoid to elliptical, with conspicuous paraseptal crests, with many ovules per locule; style as long as the perianth, trigonous in section, prismatic to obtriangular or thin and tapering, sometimes strongly papillate; stigma trilobate, truncate, depressed or conical, sometimes with horns, papillate or fimbriate with long papillae. Capsule ovoid or oblong, acute or obtuse, more or less triangular in section with blunt edges. Seeds black, numerous, flattened, horizontally stacked, semicircular with one straight side forming a thickened ridge and biseriate in each locule (or rarely discoid and uniseriate), with puzzle-like (or rarely granulate) testa.

*Chromosome number:*  $2n = 16, 18, 20, 36, 40$  (cf. Jones and Smith, 1967; Speta, 1998a).

*Number of species:* ranging from 60 to approx. 130 (cf. Speta, 1998a; Manning et al., 2002; Phillips, 1926).

*Distribution:* mainly in southern and east Africa, extending to Ethiopia and Saudi Arabia, and north of Chad and Nigeria.

6. *Coleonox* Raf., Fl. Tellur. 2: 28. 1837 – Holotype: *C. albucoides* (Aiton) Raf. = *Anthericum albucoides* Aiton

= *Osmyne* Salisb., Gen. Pl. [Salisbury]: 35. 1866 = *Ornithogalum* subgenus *Osmyne* (Salisb.) Baker in J. Linn. Soc., Bot. 13(68): 278. 1872 = *Ornithogalum*, section *Osmyne* (Salisb.) Engl., Nat. Pflanzenfam. [Engler & Prantl] 2, Abt. 5: 67. 1888 = *Albuca* subgenus *Osmyne* (Salisb.) J.C.Manning & Goldblatt in Taxon 58(1): 93. 2009 = *Monotassa* Salisb., Gen. Pl. [Salisbury]: 36. 1866 – Holotype: *Osmyne odorata* (Jacq.) Salisb. [= *Ornithogalum odoratum* Jacq.] = *C. secundum* (Jacq.) Speta = *Ornithogalum secundum* Jacq. = *Monotassa secunda* (Jacq.) Salisb.

= *Taeniola* Salisb., Gen. Pl. [Salisbury]: 35. 1866 [non *Taeniola* Bonorden, Handb. Allg. Mykol.: 36. 1851 (*Fungi*)] – Holotype: *T. vittata* (Ker Gawl.) Salisb. = *Albuca vittata* Ker Gawl. = *C. vittatum* (Ker. Gawl.) Speta = *Ornithogalum* section *Monosmyne* U.Müll.-Doblies & D.Müll.-Doblies in Feddes Repert. 107(5–6): 515. 1996 – Holotype: *Ornithogalum zebrinum* (Baker) Oberm. = *Albuca zebrina* Baker = *C. zebrinum* (Baker) Speta = *Ornithogalum* ser. *Clavifolia* U.Müll.-Doblies & D.Müll.-Doblies in Feddes Repert. 107(5–6): 516. 1996 – Holotype: *Albuca unifoliata* Rowley = *C. unifoliatum* (Rowley) Speta

Plants usually medium size. Bulb usually large, hypogeous or epigeous; outer tunics membranous, coriaceous or fleshy and green. Leaves variable, usually narrowly lanceolate to succulent and claviform, glabrous, hirsute or glandular, sometimes spirally twisted or coiled. Inflorescence racemose or subcorymbose, glabrous, hirsute or glandular; bracteoles absent. Flowers spreading, patent; tepals whitish or yellowish with a broad central green band visible on both sides; whorls equal; filaments subulate and narrowly oblong or linear-lanceolate, not constricted and all anthers well developed; ovary ovoid to elliptical, without paraseptal crests, with many ovules per locule; style as long as the perianth, subcylindrical, usually deflexed at anthesis; stigma capitate, long papillate or fimbriate. Capsule ovoid or oblong, acute or obtuse, more or less triangular in section with blunt edges. Seeds black, numerous, flattened, semicircular with one straight side forming a thickened ridge, or discoid, horizontally stacked and biseriate in each locule, with puzzle-like testa.

*Chromosome number:*  $2n = 18$  (cf. Speta, 1998a).

*Number of species:* approx. 30 (cf. Speta, 2001; Manning et al., 2009a).

*Distribution:* mainly in western South Africa, extending to southern Namibia, in winter-rainfall areas.

*Necessary combination:*

*Coleonox paucifolium* subsp. *karooparkense* (U.Müll.-Doblies & D.Müll.-Doblies) Mart.-Azorín, M.B.Crespo & Juan, **comb. nov.** = *Ornithogalum paucifolium* subsp. *karooparkense* U.Müll.-Doblies & D.Müll.-Doblies in Feddes Repert. 107(5–6): 515. 1996 [basion.]

7. *Stellarioides* Medik., Hist. & Commentat. Acad. Elect. Sci. Theod.-Palat. 6: 369. 1790 – Holotype: *S. canaliculata* Medik. = *Ornithogalum longibracteatum* Jacq. = *S. longibracteata* (Jacq.) Speta

= *Urophyllon* Salisb., Gen. Pl. [Salisbury]: 34. 1866 = *O.* subgenus *Urophyllon* (Salisb.) Baker = *O.* section *Urophyllon* series *Urophyllon* (Salisb.) U.Müll.-Doblies & D.Müll.-Doblies in Feddes Repert. 107(5–6): 488. 1996 = *Albuca* subgenus *Urophyllon* (Salisb.) J.C.Manning & Goldblatt in Taxon 58(1): 93. 2009 – Lectotype: *U. caudatum* (Jacq.) Salisb. = *O. longibracteatum* Jacq. [cf. Speta (2001); lectotypifications by Obermeyer (1978) and Müller-Doblies & Müller-Doblies (1996) are incorrect or superfluous].

Plants variable in habit, usually medium to large size. Bulb globose to ovoid, hypogeous or sometimes epigeous, green and bulbiferous (rarely with a long neck in plants from arid regions); outer tunics membranous and greyish or fleshy and green. Leaves lanceolate or linear, long tapering, flat to canaliculate, glabrous. Inflorescence 1–3 per bulb, usually long racemose and many flowered, subsPICIFORM, dense; bracts narrowly ovate-acuminate or filiform, aristate, membranous, usually long and exceeding the buds, or rarely shorter and simply ovate; bracteoles absent. Flowers small; tepals whitish to greenish, with a dark longitudinal green band visible on both sides, oblong or narrowly elliptical,  $\leq 12$  mm long; filaments ovate-acuminate or linear, flattened, sometimes with basal lobed expansions; ovary ovoid or globose, obtuse,



trigonus, and with biseriate ovules; style thickened, sometimes widened at the base; stigma tapering, not capitate. Capsule usually small,  $\leq 14$  mm long, ovoid to obovate, obtuse or acute, and trilobate in section. Seeds variable in size, numerous, irregularly compressed, flattened, roundish, angular or semicircular, biseriate and obliquely stalked in each locule, with puzzle-like testa.

**Chromosome number:**  $2n = 4, 6, 8, 10, 12, 16, 18, 20, 24, 26, 36, 54$  (cf. Stedje, 1989; Nordal and Stedje, 1993; Speta, 1998a, 2001).

**Number of species:** approx. 25 (cf. Speta, 2001; and according to the present study) to 2 (with three additional subspecies; cf. Manning et al., 2009a, but excluding *Igidia volubilis*). A comprehensive revision is still needed for this genus.

**Distribution:** temperate and subtropical regions of southern Africa, spreading north  $\leq$  Ethiopia, and with a species reaching disjointly Algeria and Morocco (*S. sessiliflorum*).

**Necessary combinations:**

***Stellarioides bakeri*** Mart.-Azorín, M.B.Crespo & Juan, **nom. nov.**  $\equiv$  *Ornithogalum chloranthum* Baker in Gard. Chron. n.s. 2: 323. 1875, nom. illeg. (syn. subst.) [non M.Bieb., Fl. Taur.-Caucas. 2: 264. 1808  $\equiv$  *Gagea chlorantha* (M.Bieb.) Schult.f.]

***Stellarioides cernua*** (Baker) Mart.-Azorín, M.B.Crespo & Juan, **comb. nov.**  $\equiv$  *Ornithogalum cernuum* Baker, Fl. Trop. Afr. [Oliver et al.] 7(3): 547. 1898 [basion.]

***Stellarioides gambosana*** (Baker) Mart.-Azorín, M.B.Crespo & Juan, **comb. nov.**  $\equiv$  *Ornithogalum gambosatum* Baker, Fl. Trop. Afr. [Oliver et al.] 7(3): 547. 1898 [basion.]

8. *Galtonia* Decne. in Fl. Serres Jard. Eur. 23: 32. 1880 – Lectotype: *G. princeps* (Baker) Decne.  $\equiv$  *Hyacinthus princeps* Baker (cf. Manning et al., 2004).

Plants large and vigorous. Bulb globose; outer tunics soft and membranous. Leaves numerous, lanceolate tapering, wide ( $> 5$  cm), glabrous and somewhat sheathing and ascending upon the stem. Inflorescence widely racemose, conical or cylindrical, sometimes corymbose; pedicels patent, with nodding apices in flower (rarely erect) and always erect in fruit; bracts membranous, linear-acuminate; bracteoles absent. Flowers never fragrant, nodding, exceptionally erect; tepals fleshy, whitish or greenish-yellowish, fused into a campanulate tube  $\leq$  half of their length or rarely free; filaments ovate-acuminate, insert at the base of the perianth and adnate to the perianth tube, merging at its end, sometimes completely free; ovary green, yellowish or black, cylindrical or ovoid; style white, filiform; stigma slightly trilobate and glandular. Capsule lanceolate, lanceolate-cylindrical or ovate, acute, widened in the basal third, triangular in section with blunt edges. Seeds large, polygonal or irregularly compressed or semicircular and flattened, biseriate and obliquely stalked in each locule, with smooth puzzle-like testa.

**Chromosome number:**  $2n = 12, 14, 16$  (cf. Obermeyer, 1978; Speta, 1998a; Forrest and Jong, 2004). Exceptionally, some counts for *G. candicans* yielded  $2n = 22, 32$  (cf. Hammett and Murray, 1993).

**Number of species:** 5 (according to the present study).

**Distribution:** temperate and subtropical regions of eastern South Africa and Swaziland.

**Necessary combination:**

***Galtonia saundersiae*** (Baker) Mart.-Azorín, M.B.Crespo & Juan, **comb. nov.**  $\equiv$  *Ornithogalum saundersiae* Baker in Gard. Chron., ser. 3, 10: 452. 1891 [basion.]

9. *Ethesia* Raf., Fl. Tellur. 3: 60. 1837  $\equiv$  *Ornithogalum* series *Xanthochlora* U.Müll.-Doblies & D.Müll.-Doblies in Feddes Repert 107: 492. 1996  $\equiv$  *O.* section *Xanthochlora* (U.Müll.-Doblies & D.Müll.-Doblies) J.C.Manning & Goldblatt in Taxon 58(1): 100. 2009 – Holotype: *E. prasina* (Ker Gawl.) Raf.  $\equiv$  *O. prasinum* Ker Gawl.

Plants middle size. Bulb ovoid; outer tunics membranous or coriaceous, rough, greyish. Leaves numerous, linear to lanceolate or oblong, canaliculate or lorate and flat, somewhat succulent, glaucous or green, glabrous, rarely not occurring with the flowers. Inflorescence a raceme cylindrical or pyramidal at the beginning; pedicels erect, firm, sometimes arcuate and lengthening and hardening in fruit, with an obtuse callus above; bracts linear to lanceolate, acuminate, membranous, equalling, shorter or longer than the pedicels; bracteoles absent. Flowers usually fragrant; tepals greenish, or green with a white marginal region, narrowly oblong or ovate, obtuse to subacute; filaments petaloid, showy, pure white, spreading, ovate-acuminate and almost overlapping at the base; ovary green, oblong-ovoid or oblong-globose, triangular; style erect, filiform; stigma slightly trilobate and papillate. Capsule oblong to obcordate or widely globose and truncate to retuse at the apex, as wide as long, trilobate in section. Seeds numerous, large, irregularly compressed (with one or two edges) to ovate-discoïd, biseriate in each locule, with blackish testa.

**Chromosome number:**  $2n = 16$  (cf. Obermeyer, 1978).

**Number of species:** 4 (according to the present study).

**Distribution:** southern Namibia and arid regions of western and center South Africa.

**Necessary combinations:**

***Ethesia haalenbergensis*** (U.Müll.-Doblies & D.Müll.-Doblies) Mart.-Azorín, M.B.Crespo & Juan, **comb. nov.**  $\equiv$  *Ornithogalum haalenbergense* U.Müll.-Doblies & D.Müll.-Doblies in Feddes Repert. 107(5–6): 492. 1996 [basion.]

***Ethesia polyphlebia*** (Baker) Mart.-Azorín, M.B.Crespo & Juan, **comb. nov.**  $\equiv$  *Ornithogalum polyphlebium* Baker, Fl. Cap. 6(3): 507. 1897 [basion.]

***Ethesia xanthochlora*** (Baker) Mart.-Azorín, M.B.Crespo & Juan, **comb. nov.**  $\equiv$  *Ornithogalum xanthochlorum* Baker, Fl. Cap. 6(3): 508. 1897 [basion.]

10. *Eliokarmos* Raf., Fl. Tellur. 2: 24. 1837 – Lectotype: *E. thyrsoïdes* (Jacq.) Raf.  $\equiv$  *Ornithogalum thyrsoïdes* Jacq. (cf. Rafinesque, Fl. Tellur. 3: 58. 1837).

$\equiv$  *Tomoxis* Raf., Fl. Tellur. 3: 54. 1837 – Lectotype (designated by Speta, 2001): *T. coarctata* (Jacq.) Raf.  $\equiv$  *O. coarctatum* Jacq. [= *O. thyrsoïdes* Jacq.]

$\equiv$  *Lomaresis* Raf., Fl. Tellur. 3: 59. 1837 – Holotype: *L. alba* Raf., nom. illeg. (syn. subst.)  $\equiv$  *O. revolutum* Jacq. [= *O. thyrsoïdes* Jacq.]



= *Aspasia* Salisb., Gen. Pl. [Salisbury]: 34 & 40. 1866 ≡ *O.* subgenus *Aspasia* (Salisb.) Oberm. ≡ *O.* subgenus *Aspasia* section *Aspasia* (Salisb.) U.Müll.-Doblies & D.Müll.-Doblies – Lectotype (designated by Obermeyer, 1978): *O. conicum* Jacq. = *Phaeocles* Salisb., Gen. Pl. [Salisbury]: 35. 1866 – Holotype: *P. maculata* (Jacq.) Salisb. ≡ *O. maculatum* Jacq. = *O.* subgenus *Aspasia* section *Hispidaspasia* U.Müll.-Doblies & D.Müll.-Doblies in Feddes Rept 107: 404. 1996 – Holotype: *O. hispidum* Hornem.

Plants small to middle size. Bulb globose; outer tunics thin and membranous to firm, thickened and rough, pale or dark coloured. Leaves numerous, lanceolate or ovate, usually ciliate or fimbriate on margins, the blade glabrous or rarely hirsute, sometimes not occurring with the flowers, or sheathing and ascending along the stem, with patent and subdistichous blades, arranged at different levels. Inflorescence racemose, cylindrical or corymbose; pedicels erect to patent in flower and erect in fruit; bracts membranous, lanceolate, wider at the base, auriculate and petaloid, or aristate; bracteoles absent. Flowers erect or spreading, diurnal (rarely nocturnal); tepals thin textured, free, diversely coloured, from pure white to yellow, orange or reddish, sometimes with dark maculae at the base or the apex, concolour or sometimes with a narrow greenish, brownish or pinkish band only visible on the abaxial side, persistent and papery in fruit, not rolled or reflexed when withering; filaments variously expanded, from linear-subulate to lanceolate or widened at the base, sometimes generating erect lobes, the inners usually wider than the outers; ovary green, yellow or dark grey, ovoid; style filiform, erect or rarely deflexed; stigma slightly trigonous and papillate. Capsule ovate, lanceolate, elliptical or fusiform, with thin walls, hidden among the persistent dry perianth, with triangular section and blunt edges. Seeds small (0.5–2 mm), numerous, irregularly angular to piriform, variously compressed, biseriate or multiseriate per locule, with papillate, echinulate, or/and puzzle-like testa.

*Chromosome number*:  $2n = 12$  (cf. Neves, 1962; Obermeyer, 1978; Speta, 1998a).

*Number of species*: approx. 28 (according to the present study).

*Distribution*: from southern Namibia to western and south-western South Africa, mainly in winter rainfall regions.

*Necessary combinations*:

*Eliokarmos bicornutus* (F.M.Leight.) Mart.-Azorín, M.B.Crespo & Juan, **comb. nov.** ≡ *Ornithogalum bicornutum* F.M.Leight. in J. S. African Bot. 11: 143. 1945 [basion.]

*Eliokarmos bolusianus* (Baker) Mart.-Azorín, M.B.Crespo & Juan, **comb. nov.** ≡ *Ornithogalum bolusianum* Baker in J. Linn. Soc., Bot. 13: 279. 1872 [basion.]

*Eliokarmos ceresianus* (F.M.Leight.) Mart.-Azorín, M.B.Crespo & Juan, **comb. nov.** ≡ *Ornithogalum ceresianum* F.M.Leight. in J. Bot., Lond. 71: 72. 1933 [basion.]

*Eliokarmos ciliiferus* (U.Müll.-Doblies & D.Müll.-Doblies) Mart.-Azorín, M.B.Crespo & Juan, **comb. nov.** ≡ *Ornithogalum ciliiferum* U.Müll.-Doblies & D.Müll.-Doblies in Feddes Rept. 107(5–6): 414. 1996 [basion.]

*Eliokarmos conicum* (Jacq.) Mart.-Azorín, M.B.Crespo & Juan, **comb. nov.** ≡ *Ornithogalum conicum* Jacq., Collectanea [Jacquin] 3: 232. 1791 [basion.]

*Eliokarmos constrictus* (F.M.Leight.) Mart.-Azorín, M.B.Crespo & Juan, **comb. nov.** ≡ *Ornithogalum constrictum* F.M.Leight. in J. S. African Bot. 11: 136. 1945 [basion.]

*Eliokarmos corticatus* (Mart.-Azorín) Mart.-Azorín, M.B.Crespo & Juan, **comb. nov.** ≡ *Ornithogalum corticatum* Mart.-Azorín in Bothalia 37(2): 140. 2007 [basion.]

*Eliokarmos decus-montium* (G.Will.) Mart.-Azorín, M.B.Crespo & Juan, **comb. nov.** ≡ *Ornithogalum decus-montium* G.Will. in Bothalia 28(1): 63. 1998 [basion.]

*Eliokarmos deltoideus* (Baker) Mart.-Azorín, M.B. Crespo & Juan, **comb. nov.** ≡ *Ornithogalum deltoideum* Baker in J. Linn Soc. (Bot.) 13: 281. 1872 [basion.]

*Eliokarmos dubius* (Houtt.) Mart.-Azorín, M.B.Crespo & Juan, **comb. nov.** ≡ *Ornithogalum dubium* Houtt., Handl. Pl.-Kruidk. 2(12): 309, t. 82, fig. 3. 1780 [basion.] = *E. aureus* (Curtis) Raf. ≡ *O. aureum* Curtis

*Eliokarmos geniculatus* (Oberm.) Mart.-Azorín, M.B.Crespo & Juan, **comb. nov.** ≡ *Ornithogalum geniculatum* Oberm. in Bothalia 12(3): 344. 1978 [basion.]

*Eliokarmos gifbergensis* (U.Müll.-Doblies & D.Müll.-Doblies) Mart.-Azorín, M.B.Crespo & Juan, **comb. nov.** ≡ *Ornithogalum gifbergense* U.Müll.-Doblies & D.Müll.-Doblies in Feddes Rept. 107(5–6): 418. 1996 [basion.]

*Eliokarmos hallii* (Oberm.) Mart.-Azorín, M.B.Crespo & Juan, **comb. nov.** ≡ *Ornithogalum hallii* Oberm. in Bothalia 12(3): 347. 1978 [basion.]

*Eliokarmos hispidulus* (U.Müll.-Doblies & D.Müll.-Doblies) Mart.-Azorín, M.B.Crespo & Juan, **comb. nov.** ≡ *O. hispidulum* U.Müll.-Doblies & D.Müll.-Doblies in Feddes Rept. 107(5–6): 411. 1996 [basion.]

*Eliokarmos inandensis* (Baker) Mart.-Azorín, M.B.Crespo & Juan, **comb. nov.** ≡ *Ornithogalum inandense* Baker, Fl. Cap. (Harvey) 6(3): 503. 1897 [basion.]

*Eliokarmos inclusus* (F.M.Leight.) Mart.-Azorín, M.B.Crespo & Juan, **comb. nov.** ≡ *Ornithogalum inclusum* F.M.Leight. in S. African Gard. 24: 50. 1934 [basion.]

*Eliokarmos leeupoortensis* (U.Müll.-Doblies & D.Müll.-Doblies) Mart.-Azorín, M.B.Crespo & Juan, **comb. nov.** ≡ *Ornithogalum leeupoortense* U.Müll.-Doblies & D.Müll.-Doblies in Feddes Rept. 107(5–6): 396. 1996 [basion.]

*Eliokarmos namaquanulus* (U.Müll.-Doblies & D.Müll.-Doblies) Mart.-Azorín, M.B.Crespo & Juan, **comb. nov.** ≡ *Ornithogalum namaquanulum* U.Müll.-Doblies & D.Müll.-Doblies in Feddes Rept. 107(5–6): 410. 1996 [basion.]

*Eliokarmos naviculus* (F.W.Barker ex Oberm.) Mart.-Azorín, M.B.Crespo & Juan, **comb. nov.** ≡ *Ornithogalum naviculum* F.W.Barker ex Oberm. in Bothalia 12(3): 348. 1978 [basion.]

*Eliokarmos neomaculatus* Mart.-Azorín, M.B.Crespo & Juan, **nom. nov.** ≡ *Ornithogalum maculatum* Jacq., Collectanea [Jacquin] 3: 368. 1791 (syn. subst.) [non *E. maculatus* Raf., Fl. Tellur. 3: 59. 1837 = *E. thyrsoides* (Jacq.) Raf.]

*Eliokarmos pilosus* (Jacq.) Mart.-Azorín, M.B.Crespo & Juan, **comb. nov.** ≡ *Anthericum pilosum* Jacq., Ic. Pl. Rar. 2(15): t. 416. 1794 [basion.] = *Ornithogalum hispidum* Hornem.

*Eliokarmos pilosus* subsp. *bergii* (Schltdl.) Mart.-Azorín, M.B.Crespo & Juan, **comb. nov.** ≡ *Ornithogalum bergii* Schltdl. in *Linnaea* 1: 254. 1826 [basion.]

*Eliokarmos pruinus* (F.M.Leight.) Mart.-Azorín, M.B.Crespo & Juan, **comb. nov.** ≡ *Ornithogalum pruinusum* F.M.Leight. in *J. S. African Bot.* 10: 104. 1944 [basion.]

*Eliokarmos puberulus* (Oberm.) Mart.-Azorín, M.B.Crespo & Juan, **comb. nov.** ≡ *Ornithogalum puberulum* Oberm. in *Bothalia* 12(3): 337. 1978 [basion.]

*Eliokarmos rubescens* (F.M.Leight.) Mart.-Azorín, M.B.Crespo & Juan, **comb. nov.** ≡ *Ornithogalum rubescens* F.M.Leight. in *J. S. African Bot.* 11: 142. 1945

*Eliokarmos rupestris* (L.f.) Mart.-Azorín, M.B.Crespo & Juan, **comb. nov.** ≡ *Ornithogalum rupestre* L.f., *Suppl. Pl.*: 199. 1782 [basion.]

*Eliokarmos strictus* (L.Bolus) Mart.-Azorín, M.B.Crespo & Juan, **comb. nov.** ≡ *Ornithogalum strictum* L.Bolus in *J. Bot.* 71: 72. 1933 [basion.]

*Eliokarmos synanthifolius* (F.M.Leight.) Mart.-Azorín, M.B.Crespo & Juan, **comb. nov.** ≡ *Ornithogalum synanthifolium* F.M.Leight. in *J. S. African Bot.* 11: 176. 1945 [basion.]

*Eliokarmos thermophilus* (F.M.Leight.) Mart.-Azorín, M.B.Crespo & Juan, **comb. nov.** ≡ *Ornithogalum thermophilum* F.M.Leight. in *J. S. African Bot.* 11: 145. 1945 [basion.]

11. *Avonsera* Speta in *Phyton* 38: 95. 1998 ≡ *Ornithogalum* subgenus *Avonsera* (Speta) J.C.Manning & Goldblatt in *Taxon* 58(1): 100. 2009 – Holotype: *A. convallarioides* (H.Perrier) Speta ≡ *O. convallarioides* H.Perrier

Plants middle size. Bulbs with membranous outer tunics. Leaves various, wide, elliptical to oblong or obovate, abruptly contracted at the base in a pseudopetiole, glabrous, occurring with flowers. Inflorescence loosely racemose, usually with two flowers per bract in its lower part; pedicel long and thin, erect to patent in flower and patent in fruit; bracts lanceolate, membranous, small; bracteoles present. Flowers diurnal, spreading; tepals thin, white, connate at the base; filaments deltoid or tapering and acute at the apex, connate at the base forming a short tube; ovary green, obovoid, truncate at the apex; style white, filiform; stigma punctiform. Capsule obovate, truncate at the apex, trilobate in section. Seeds ovoid.

*Chromosome number*:  $2n = 14$  (cf. *Wetschnig et al.*, 2007).

*Number of species*: 1 (cf. *Speta*, 1998a).

*Distribution*: Madagascar.

12. *Neopaterosonia* Schönland in *Rec. Albany Mus.* 2: 251. 1912 ≡ *Ornithogalum* section *Neopaterosonia* (Schönland) J.C.Manning & Goldblatt in *Taxon* 58(1): 101. 2009 – Holotype: *N. uitenhagensis* Schönland

Plants small. Bulb globose; outer tunics membranous or coriaceous, greyish, sometimes with a long neck. Leaf solitary to various, lanceolate, tapering or oblong, somewhat sheathing at the base. Inflorescence in subcorymbose raceme; pedicels erect-patent in flower and erect in fruit; bracts membranous, linear-acuminate, shorter than the pedicels; bracteoles absent. Flowers erect, remaining open; tepals somewhat fleshy, whitish or greenish, sometimes with longitudinal dark green nerves, oblong, and fused at the base in a very short tube;

filaments subulate, with an expanded triangular or lobate base, connate and adnate to perianth; ovary green and ovoid; style whitish, filiform; stigma with three patent long and deflexed lobes, sometimes only trigonous. Capsule lanceolate or ovoid-triangular, acute or apiculate, triangular in section with blunt edges. Seeds black, small, angular, piriform or subglobose, biseriate in each locule, somewhat verruculose, with pitted puzzle-like testa cells.

*Chromosome number*: no data available.

*Number of species*: 4 (according to the present study).

*Distribution*: south-west and southern parts of South Africa.

*Necessary combination*:

*Neopaterosonia rotata* (U.Müll.-Doblies & D.Müll.-Doblies) Mart.-Azorín, M.B.Crespo & Juan, **comb. nov.** ≡ *Ornithogalum rotatum* U.Müll.-Doblies & D.Müll.-Doblies in *Feddes Repert.* 107(5–6): 482. 1996 [basion.]

13. *Elsiea* F.M.Leight. in *J. S. African Bot.* 10: 55. 1944 ≡ *Ornithogalum* section *Elsiea* (F.M.Leight.) J.C.Manning & Goldblatt in *Taxon* 58(1): 102. 2009 – Type: *E. corymbosa* F.M.Leight. ≡ *O. esterhuyseniae* Oberm. [non *O. corymbosum* Ruiz & Pavón (1802)]

Plant middle size, ≤70 cm. Bulb few developed, composed by tubular foliar sheaths growing up from a thick subterranean and subrhizomatous stem. Leaves numerous, occurring with the flowers, glabrous, smooth, linear-convolute, with margins rolled in a terete appendix at the apex. Inflorescence racemose-corymbose, erect, 60 cm long; with erect pedicels, 1–6 cm long; bracts shorter than the pedicels, linear-lanceolate, acuminate, auriculate and membranous; bracteoles absent. Flowers small, erect, white, thin; tepals white, linear, connate into a short tube 3–4 mm, and somewhat reflexed and persistent after withering; filaments linear-lanceolate, acute and shortly adnate to perianth, the inner ones somewhat wider than the outer ones; ovary obovoid, triangular, substipitate; style filiform; stigma slightly trigonous and papillate. Capsule black, ovoid-triangular sharply angled, stipitate, obtuse and depressed at the apex. Seeds small or medium size, angular, irregularly compressed, almost winged.

*Chromosome number*: no data available.

*Number of species*: 1 (according to the present study).

*Distribution*: mountainous areas of south-west of South Africa.

14. *Nicipe* Raf., *Fl. Tellur.* 3: 54. 1837 – Holotype: *N. nivea* (Aiton) Raf. ≡ *Ornithogalum niveum* Aiton

= *O.* group *Angustifoliati* Oberm. in *Bothalia* 12: 349. 1978 ≡ *O.* subgenus *Aspasia* section *Linaspasia* U.Müll.-Doblies & D.Müll.-Doblies in *Feddes Repert* 107: 436. 1996 – Holotype: *O. juncifolium* Jacq.

= *O.* subgenus *Aspasia* section *Vaginaspasia* U.Müll.-Doblies & D.Müll.-Doblies in *Feddes Repert* 107: 428. 1996 ≡ *O.* series *Vaginaspasia* (U.Müll.-Doblies & D.Müll.-Doblies) J.C.Manning & Goldblatt in *Taxon* 58(1): 102. 2009 – Holotype: *O. zebrinellum* U.Müll.-Doblies & D.Müll.-Doblies = *O.* subgenus *Aspasia* section *Nanaspasia* U.Müll.-Doblies & D.Müll.-Doblies in *Feddes Repert* 107: 459. 1996 ≡ *O.* series *Nanaspasia* (U.Müll.-Doblies & D.Müll.-Doblies) J.C.Manning & Goldblatt in *Taxon* 58(1): 103. 2009 – Holotype: *O. nanodes* F.M.Leight.



= *O.* subgenus *Urophyllon* section *Helogalum* U.Müll.-Doblies & D.Müll.-Doblies in Feddes Repert 107: 483. 1996 – Holotype: *O. flexuosum* (Thunb.) U.Müll.-Doblies & D.Müll.-Doblies

Plants small to middle size. Bulb globose, rarely few developed in wet habitats, ending abruptly in an epigeous neck, occasionally surrounded by tubular, transversally banded and epigeous cataphylls; outer tunics membranous or coriaceous; roots usually branched. Leaves numerous, all emerging almost at the same level from the bulb neck, narrow and long, 0.5–6 mm wide (rarely  $\leq 20$  mm), linear to cylindrical or lanceolate, often with margins enrolled, rarely flat and broader or even coriaceous and boat-shaped, glabrous or hirsute, spreading or rarely twisted, with entire blunt, ciliate or crispate, sometimes not occurring with the flowers. Inflorescence in raceme cylindrical to subcorymbose, one to three per bulb, dense and many-flowered, elongating with age; pedicels erect or erect-patent; bracts small, membranous, deltoid-aristate or acuminate, auriculate and sometimes denticulate at the base. Flowers erect or spreading, diurnal; tepals almost free to fused at the base up to one-third, thin textured, white to yellowish on the adaxial side and usually with a dark pinkish, reddish, greenish or brownish not defined band on the abaxial side, lanceolate to ovate, acute or obtuse, spreading or reflexed when withering; filaments subulate to linear or ovate-acuminate, expanded at the base, the inners usually wider than the outers, free and adnate (exceptionally connate in *O. syndelphicum*); ovary elliptical, ovoid or obovoid, contracted in the lower part, ovules biseriate or multiseriate per locule; style filiform; stigma capitate, slightly trigonous or trilobate. Capsule trigonous-elliptical to trilobate-turbinate, with thin walls; usually hidden among the dry and persistent perianth or exposed. Seeds small or large (0.5–5 mm), cuneate, subovoid, angular and irregularly compressed, multiseriate in each locule, with smooth testa.

*Chromosome number*:  $2n = 10, 12$  (cf. Obermeyer, 1978).

*Number of species*: approx. 44 (according to the present study).

*Distribution*: mainly in the south and east of Africa, not crossing the Sahara desert northwards.

*Necessary combinations*:

*Nicipe adseptentrionesvergentula* (U.Müll.-Doblies & D.Müll.-Doblies) Mart.-Azorín, M.B.Crespo & Juan, **comb. nov.**  $\equiv$  *Ornithogalum adseptentrionesvergentulum* U.Müll.-Doblies & D.Müll.-Doblies in Feddes Repert. 107(5–6): 446. 1996 [basion.]

*Nicipe aetfatensis* (U.Müll.-Doblies & D.Müll.-Doblies) Mart.-Azorín, M.B.Crespo & Juan, **comb. nov.**  $\equiv$  *Ornithogalum aetfatense* U.Müll.-Doblies & D.Müll.-Doblies in Feddes Repert. 107(5–6): 459. 1996 [basion.]

*Nicipe aloiformis* (Oberm.) Mart.-Azorín, M.B.Crespo & Juan, **comb. nov.**  $\equiv$  *Ornithogalum aloiforme* Oberm. in Bothalia 12(1): 61. 1976 [basion.]

*Nicipe anguina* (F.M.Leight. ex Oberm.) Mart.-Azorín, M.B.Crespo & Juan, **comb. nov.**  $\equiv$  *Ornithogalum anguinum* F.M.Leight. ex Oberm. in Bothalia 12(3): 356. 1978 [basion.]

*Nicipe annae-ameliae* (U.Müll.-Doblies & D.Müll.-Doblies) Mart.-Azorín, M.B.Crespo & Juan, **comb. nov.**  $\equiv$  *Ornithogalum annae-ameliae* U.Müll.-Doblies & D.Müll.-Doblies in Willdenowia 11(1): 64. 1981 [basion.]

*Nicipe baurii* (Baker) Mart.-Azorín, M.B.Crespo & Juan, **comb. nov.**  $\equiv$  *Ornithogalum baurii* Baker, Fl. Cap. (Harvey) 6(3): 504. 1897 [basion.]

*Nicipe britteniae* (F.M.Leight. ex Oberm.) Mart.-Azorín, M.B.Crespo & Juan, **comb. nov.**  $\equiv$  *Ornithogalum britteniae* F.M.Leight. ex Oberm. in Bothalia 12(3): 352. 1978 [basion.]

*Nicipe campanulata* (U.Müll.-Doblies & D.Müll.-Doblies) Mart.-Azorín, M.B.Crespo & Juan, **comb. nov.**  $\equiv$  *Ornithogalum campanulatum* U.Müll.-Doblies & D.Müll.-Doblies in Feddes Repert. 107(5–6): 450. 1996 [basion.]

*Nicipe capillaris* (J.M.Wood & M.S.Evans) Mart.-Azorín, M.B.Crespo & Juan, **comb. nov.**  $\equiv$  *Ornithogalum capillare* J.M.Wood & M.S.Evans in J. Bot. 35: 490. 1897, ‘capillaris’ [basion.]

*Nicipe capillifolia* (Fourc.) Mart.-Azorín, M.B.Crespo & Juan, **comb. nov.**  $\equiv$  *Ornithogalum capillifolium* Fourc. in Trans. Roy. Soc. South Africa 21: 80. 1932 [basion.]

*Nicipe comptonii* (F.M.Leight.) Mart.-Azorín, M.B.Crespo & Juan, **comb. nov.**  $\equiv$  *Ornithogalum comptonii* F.M.Leight. in J. S. African Bot. 10: 119. 1944 [basion.]

*Nicipe comptum* (Baker) Mart.-Azorín, M.B.Crespo & Juan, **comb. nov.**  $\equiv$  *Ornithogalum comptum* Baker in J. Linn. Soc., Bot. 13: 274. 1872 [basion.]

*Nicipe diphylla* (Baker) Mart.-Azorín, M.B.Crespo & Juan, **comb. nov.**  $\equiv$  *Ornithogalum diphyllum* Baker in Bull. Misc. Inform. Kew 1895: 153. 1895 [basion.]

*Nicipe dolichopharynx* (U.Müll.-Doblies & D.Müll.-Doblies) Mart.-Azorín, M.B.Crespo & Juan, **comb. nov.**  $\equiv$  *Ornithogalum dolichopharynx* U.Müll.-Doblies & D.Müll.-Doblies in Feddes Repert. 107(5–6): 466. 1996 [basion.]

*Nicipe dregeana* (Kunth) Mart.-Azorín, M.B.Crespo & Juan, **comb. nov.**  $\equiv$  *Ornithogalum dregeanum* Kunth in Enum. Pl. [Kunth] 4: 351. 1843 [basion.]

*Nicipe filifolia* (Thunb.) Mart.-Azorín, M.B.Crespo & Juan, **comb. nov.**  $\equiv$  *Anthericum filifolium* Thunb., Prodr. Pl. Cap. 1: 62. 1794 [basion.]  $\equiv$  *O. thunbergianulum* U.Müll.-Doblies & D.Müll.-Doblies in Feddes Repert. 107(5–6): 440. 1996

*Nicipe fissurisedula* (U.Müll.-Doblies & D.Müll.-Doblies) Mart.-Azorín, M.B.Crespo & Juan, **comb. nov.**  $\equiv$  *Ornithogalum fissurisedulum* U.Müll.-Doblies & D.Müll.-Doblies in Feddes Repert. 107(5–6): 466. 1996 [basion.]

*Nicipe flexuosa* (Thunb.) Mart.-Azorín, M.B.Crespo & Juan, **comb. nov.**  $\equiv$  *Hyacinthus flexuosus* Thunb. Prodr. Pl. Cap. 63. 1794 [basion.]  $\equiv$  *O. ornithogaloides* (Kunth) Oberm.

*Nicipe gracillima* (R.E.Fr.) Mart.-Azorín, M.B.Crespo & Juan, **comb. nov.**  $\equiv$  *Ornithogalum gracillimum* R.E.Fr. in Acta Horti Berg. 9: 77. 1927 [basion.]

*Nicipe graminifolia* (Thunb.) Mart.-Azorín, M.B.Crespo & Juan, **comb. nov.**  $\equiv$  *Ornithogalum graminifolium* Thunb. in Prodr. Pl. Cap. 1: 61. 1794 [basion.]

*Nicipe gregoriana* (U.Müll.-Doblies & D.Müll.-Doblies) Mart.-Azorín, M.B.Crespo & Juan, **comb. nov.**  $\equiv$  *Ornithogalum gregorianum* U.Müll.-Doblies & D.Müll.-Doblies in Feddes Repert. 107(5–6): 462. 1996 [basion.]

*Nicipe hesperantha* (U.Müll.-Doblies & D.Müll.-Doblies) Mart.-Azorín, M.B.Crespo & Juan, **comb. nov.**  $\equiv$



*Ornithogalum hesperanthum* U.Müll.-Doblies & D.Müll.-Doblies in Feddes Repert. 107(5–6): 443. 1996 [basion.]

*Nicipe juncifolia* (Jacq.) Mart.-Azorín, M.B.Crespo & Juan, **comb. nov.** = *Ornithogalum juncifolium* Jacq., Pl. Rar. Hort. Schoenbr. 1: 46, t. 90. 1797 [basion.]

*Nicipe longicollum* (U.Müll.-Doblies & D.Müll.-Doblies) Mart.-Azorín, M.B.Crespo & Juan, **comb. nov.** = *Ornithogalum longicollum* U.Müll.-Doblies & D.Müll.-Doblies in Feddes Repert. 107(5–6): 462. 1996 [basion.]

*Nicipe mater-familias* (U.Müll.-Doblies & D.Müll.-Doblies) Mart.-Azorín, M.B.Crespo & Juan, **comb. nov.** = *Ornithogalum mater-familias* U.Müll.-Doblies & D.Müll.-Doblies in Feddes Repert. 107(5–6): 444. 1996 [basion.]

*Nicipe monophylla* (Baker) Mart.-Azorín, M.B.Crespo & Juan, **comb. nov.** = *Ornithogalum monophyllum* Baker, Fl. Cap. (Harvey) 6(3): 502. 1897 [basion.]

*Nicipe monophylla* subsp. *eckardtiana* (U.Müll.-Doblies & D.Müll.-Doblies) Mart.-Azorín, M.B.Crespo & Juan, **comb. nov.** = *Ornithogalum monophyllum* subsp. *eckardtianum* U.Müll.-Doblies & D.Müll.-Doblies in Feddes Repert. 107(5–6): 434. 1996 [basion.]

*Nicipe nanodes* (F.M.Leight.) Mart.-Azorín, M.B.Crespo & Juan, **comb. nov.** = *Ornithogalum nanodes* F.M.Leight. in J. S. African Bot. 9: 113. 1943 [basion.]

*Nicipe natalensis* (Baker) Mart.-Azorín, M.B.Crespo & Juan, **comb. nov.** = *Ornithogalum natalense* Baker in Bull. Misc. Inform. Kew. 1893: 210. 1893 [basion.]

*Nicipe oreogenes* (Schltr. ex Poelln.) Mart.-Azorín, M.B.Crespo & Juan, **comb. nov.** = *Ornithogalum oreogenes* Schltr. ex Poelln. in Feddes Repert. Spec. Nov. Regni Veg. 54: 24. 1944 [basion.]

*Nicipe paludosa* (Baker) Mart.-Azorín, M.B.Crespo & Juan, **comb. nov.** = *Ornithogalum paludosum* Baker in J. Bot. 12: 366. 1874 [basion.]

*Nicipe perdurans* (A.P.Dold & S.A.Hammer) Mart.-Azorín, M.B.Crespo & Juan, **comb. nov.** = *Ornithogalum perdurans* A.P.Dold & S.A.Hammer in Bothalia 33(1): 112. 2003 [basion.]

*Nicipe perparva* (V.Poelln.) Mart.-Azorín, M.B.Crespo & Juan, **comb. nov.** = *Ornithogalum perparvum* V.Poelln. in Portugaliae Acta Biol., Sér. B, Sist., 1: 214. 1945 [basion.]

*Nicipe petraea* (Fourc.) Mart.-Azorín, M.B.Crespo & Juan, **comb. nov.** = *Ornithogalum petraeum* Fourc. in Trans. Roy. Soc. South Africa 21: 81. 1932 [basion.]

*Nicipe pilosa* (L.f.) Mart.-Azorín, M.B.Crespo & Juan, **comb. nov.** = *Ornithogalum pilosum* L.f., Suppl. Pl.: 199. 1782 [basion.]

*Nicipe pullata* (F.M.Leight.) Mart.-Azorín, M.B.Crespo & Juan, **comb. nov.** = *Ornithogalum pullatum* F.M.Leight. in J. S. African Bot. 11: 153. 1945 [basion.]

*Nicipe rogersii* (Baker) Mart.-Azorín, M.B.Crespo & Juan, **comb. nov.** = *Ornithogalum rogersii* Baker, Fl. Cap. (Harvey) 6(3): 501. 1897 [basion.]

*Nicipe sardienii* (van Jaarsv.) Mart.-Azorín, M.B.Crespo & Juan, **comb. nov.** = *Ornithogalum sardienii* van Jaarsv. in Bradleya 12: 33. 1994 [basion.]

*Nicipe schlechteriana* (Schinz.) Mart.-Azorín, M.B.Crespo & Juan, **comb. nov.** = *Ornithogalum schlechterianum* Schinz. in Bull. Herb. Boissier 2: 223. 1894 [basion.]

*Nicipe sephtonii* (Hilliard & B.L.Burt) Mart.-Azorín, M.B.Crespo & Juan, **comb. nov.** = *Ornithogalum sephtonii* Hilliard & B.L.Burt in Notes Roy. Bot. Gard. Edinburgh 41(2): 308. 1983 [basion.]

*Nicipe synadelphica* (U.Müll.-Doblies & D.Müll.-Doblies) Mart.-Azorín, M.B.Crespo & Juan, **comb. nov.** = *Ornithogalum synadelphicum* U.Müll.-Doblies & D.Müll.-Doblies in Feddes Repert. 107(5–6): 452. 1996 [basion.]

*Nicipe tortuosa* (Baker) Mart.-Azorín, M.B.Crespo & Juan, **comb. nov.** = *Ornithogalum tortuosum* Baker, Fl. Cap. (Harvey) 6(3): 510. 1897 [basion.]

*Nicipe vallis-gratae* (Schltr.) Mart.-Azorín, M.B.Crespo & Juan, **comb. nov.** = *Ornithogalum vallis-gratae* Schltr. in Feddes Repert. Spec. Nov. Regni Veg. 54: 26. 1944 [basion.]

*Nicipe verae* (U.Müll.-Doblies & D.Müll.-Doblies) Mart.-Azorín, M.B.Crespo & Juan, **comb. nov.** = *Ornithogalum verae* U.Müll.-Doblies & D.Müll.-Doblies in Feddes Repert. 107(5–6): 432. 1996 [basion.]

*Nicipe zebrinella* (U.Müll.-Doblies & D.Müll.-Doblies) Mart.-Azorín, M.B.Crespo & Juan, **comb. nov.** = *Ornithogalum zebrinellum* U.Müll.-Doblies & D.Müll.-Doblies in Willdenowia 11(1): 47. 1981 [basion.]

15. *Cathissa* Salisb., Gen. Pl. [Salisbury]: 34. 1866 = *Ornithogalum* subgenus *Cathissa* (Salisb.) Baker in J. Linn. Soc., Bot. 13: 261. 1872 = *O.* section *Cathissa* (Salisb.) Engl., Nat. Pflanzenfam. [Engler & Prantl] 2, Abt. 5: 67. 1888 – Holotype: *C. cocinna* (Salisb.) Speta = *O. concinnum* Salisb.

Plants small, middle size or large. Bulb ovate; with greyish to brownish, membranous outer tunics. Leaves sole to numerous, green, narrowly lanceolate to long tapering, glabrous and occurring with the flowers, sometimes with a long terminal terete appendix. Inflorescence racemose or subspicate, longer than wide; pedicels erect-patent in flower and adpressed to stem in fruit; bracts large, triangular to lanceolate, membranous or papery, petaloid and auriculate; bracteoles absent. Flowers white, suberect, patent or slightly nodding; tepals free, completely white, widely ovate or obovate, rarely with small greenish dots at the apex of the abaxial side; filament subulate to tapering; ovary green or yellowish, ovoid-fusiform; style white and filiform, or greenish in the lower part and white at the apex; stigma slightly capitate, trigonous and glandular-papillate. Capsule ovate-lanceolate, oblong and triangular with blunt edges section. Seeds semicircular, irregular or angular, polygonal or apiculate, biseriate or multiseriate per locule, with granulate or puzzle-like testa.

*Chromosome number:*  $2n = 32, 34, 36$  (cf. Speta, 1998a).

*Number of species:* 3 (cf. Martínez-Azorín et al., 2007).

*Distribution:* Spain, Portugal and Morocco.

*Necessary combinations:*

*Cathissa unifolia* (L.) Mart.-Azorín, M.B.Crespo & Juan, **comb. nov.** = *Scilla unifolia* L., Sp. Pl.: 309 (1753) [basion.] = *C. unifolia* (L.) Salisb., Gen. Pl. [Salisbury]: 34 (1866), **comb. inval.** (according to art. 33-1, ICBN) = *C. broteroi* (M.Laínz) Speta in Stapfia 75: 171 (2001)

16. *Melomphis* Raf., Fl. Tell. 2: 21. 1837 = *Caruelia* Parl., Nouv. Gen. Sp. Monocot.: 21. 1854 = *Ornithogalum* subgenus *Caruelia* (Parl.) Baker in J. Linn. Soc. (Bot.) 13: 259. 1872 =

*O.* section *Caruelia* (Parl.) Engl., Nat. Pflanzenfam. [Engler & Prantl] 2, Abt. 5: 67. 1888 = *Myranthe* Salisb., Gen. Pl. [Salisbury]: 34. 1866 = *O.* section *Melomphis* (Raf.) J.C.Manning & Goldblatt in Taxon 58(1): 103. 2009 – Lectotype: *M. arabica* (L.) Raf. (cf. Speta, 2001) = *C. arabica* (L.) Parl. = *M. arabica* (L.) Salisb. = *O. arabicum* L.

Plants large. Bulb ovoid, with membranous outer tunics. Leaves green, lanceolate-oblong, wide, long tapering. Inflorescence corymbose or subcorymbose-pyramidal, bracts membranous, ovate-triangular, wide and petaloid (white with greenish apex); bracteoles absent. Flowers white, showy; tepals white all over, wide, ovate or obovate, withering soon after anthesis; filaments white, narrowly triangular; ovary globose and shining black; style filiform and white or blackish below; stigma trigonous, glandular. Capsule subglobose, trigonous, with truncate apex. Seeds blackish, polygonal or irregularly compressed, with tuberculate or papillate testa.

*Chromosome number:*  $2n = 28, 51$  (cf. Speta, 1998a)

*Number of species:* 3 (according to the present study).

*Distribution:* Mediterranean basin, extending to the Middle East.

*Necessary combinations:*

*Melomphis melanogyna* (Cullen) Mart.-Azorín, M.B.Crespo & Juan, **comb. nov.** = *Ornithogalum melanogynum* Cullen in Notes Roy. Bot. Gard. Edinburgh 27: 309. 1967 [basion.]

*Melomphis persica* (Hausskn. ex Bornm.) Mart.-Azorín, M.B.Crespo & Juan, **comb. nov.** = *Ornithogalum persicum* Hausskn. ex Bornm. in Beih. Bot. Centralbl. 24(2): 102. 1908 [basion.]

17. *Loncomelos* Raf., Fl. Tell. 2: 24. 1837 – Lectotype: *L. pyrenaicus* (L.) L.D.Hrouda ex Holub (cf. Speta, 2001) = *Ornithogalum pyrenaicum* L.

= *Celsia* Heist. ex Fabr., Enum. (ed. 2) [Fabr.]: 22. 1763, pro parte [*O. latifolium* L.], nom. illeg. [non *Celsia* L., Sp. Pl.: 621. 1753; Scrophulariaceae]

= *Beryllis* Salisb., Gen. Pl. [Salisbury]: 33. 1866 = *O.* subgenus *Beryllis* (Salisb.) Baker in J. Linn. Soc. (Bot.) 13: 260. 1872 = *O.* section *Beryllis* (Salisb.) Engl., Nat. Pflanzenfam. [Engler & Prantl] 2, Abt. 5: 67. 1888 = *O.* subgenus *Spetagalum* U.Müll.-Doblies & D.Müll.-Doblies in Feddes Repert. 107(5–6): 520. 1996 [nom. superfl.] – Lectotype: *O. pyrenaicum* L. (cf. Stearn, 1983) = *Eustachys* Salisb., Gen. Pl. [Salisbury]: 33. 1866

Bulb with outer tunics membranous, sometimes with long neck. Leaves tapering, wide, long, glabrous, sometimes not occurring with the flowers. Inflorescence racemose, narrow, much longer than wide; pedicels erect-patent in flower and erect and appressed to the stem in fruit; bracts membranous, deltoid-aristate, usually shorter than the pedicels; bracteoles absent. Flowers white or yellowish; tepals with a greenish longitudinal band only evident on the abaxial side; filaments flattish and expanded at the base; ovary green, ovate to spherical; style white and filiform; stigma punctiform and slightly trigonous. Capsule ovate-lanceolate, triangular with blunt edges in section. Seeds polygonal or irregularly compressed, biseriate per locule, with tuberculate, papillate or rugose testa.

*Chromosome number:*  $2n = 16, 18, 22, 24, 26, 28, 32, 36, 54$  (cf. Speta, 1998a).

*Number of species:* approx. 20 (cf. Speta, 1998a, 2001).

*Distribution:* Mediterranean basin.

*Observations:* when the name *O.* subgenus *Beryllis* (Salisb.) Baker was published it was nomenclaturally superfluous, since the type of *Urophyllon* was included in it (Art. 52.1, 52.2e; McNeill et al., 2006). Consequently it was a synonym of *O.* subgenus *Urophyllon* (Salisb.) Baker; though it was not illegitimate (Art. 52.3). When both subgenera are recognized, both names recover their validity and they can be used, each one with its corresponding circumscription. In this way, the new name *O.* subgenus *Spetagalum*, proposed by Müller-Doblies and Müller-Doblies (1996) to replace the supposedly illegitimate *O.* subgenus *Beryllis*, is superfluous, since these authors noted explicitly that this new name should be used exclusively for the Mediterranean plants, keeping the South African ones in *O.* subgenus *Urophyllon* (*Urophyllon sensu stricto*).

18. *Honorius* Gray in Nat. Arr. Brit. Pl. 2: 177. 1821 = *Albucea* Rchb., Fl. Germ. Excurs.: 109. 1830 = *Myogalum* Link in Handb. 1: 163. 1829 = *Ornithogalum* subgenus *Myogalum* (Link) Baker in J. Linn. Soc. (Bot.) 13: 260. 1872 = *O.* section *Myogalum* (Link) Engl., Nat. Pflanzenfam. [Engler & Prantl] 2, Abt. 5: 67. 1888 = *Syncodium* Raf., Fl. Tell. 2: 22. 1837 = *Brizophile* Salisb., Gen. Pl. [Salisbury]: 34. 1866 – Holotype: *H. nutans* (L.) Gray = *O. nutans* L.

Plants middle size. Bulb with brown or whitish membranous outer tunics. Leaves linear and tapering to lanceolate or oblong, occurring with the flowers, glabrous, sometimes with a longitudinal greyish band. Inflorescence racemose; pedicels erect-patent in flower, erect to reflexed in fruit; bracts lanceolate or ovate-lanceolate, membranous or papery; bracteoles absent. Flowers suberect or patent, campanulate at the anthesis; tepals free, ovate-lanceolate, erect, white with a wide longitudinal green band only visible on the abaxial side; filaments lanceolate to tapering, at least outers wider at the apex and forming two erect lobes accompanying the anther; ovary green, ovate, trigonous, with six blunt edges; style white and filiform; stigma punctiform slightly trigonous and glandular. Capsule ovate or oblong, sometimes truncate at the apex, with six weak ribs in section, mostly nodding. Seeds globose, with prominent sinuose-reticulate testa.

*Chromosome number:*  $2n = 14, 28, 30, 35, 42$  (cf. Speta, 1998a).

*Number of species:* 8 (cf. Speta, 1998a; Holub, 1976).

*Distribution:* south-eastern Europe, western Turkey and Middle East (cf. Speta, 1998a).

*Observations:* *O. pamphylicum* was described by Düşen and Sümbül (2002) as a member of *O.* subg. *Myogalum*, close to *O. nutans*. However, the former species lacks some of the morphological traits defining *Honorius*, such as the filaments lobed, winged or toothed in the upper part, or the subacute to truncate capsule. Therefore it is here excluded from *Honorius*. New data are needed for a more accurate placement of *O. pamphylicum* in Ornithogaleae.

*Necessary combinations:*

*Honorius demirzianus* (H.Malyer & Koyuncu) Mart.-Azorín, M.B.Crespo & Juan, **comb. nov.** =

*Ornithogalum demirizianum* H.Malyer & Koyuncu in Turkish J. Bot. 13(2): 301. 1989 [basion.]

*Honorius chetikianus* (Uysal, Ertugrul & Dural) Mart.-Azorín, M.B.Crespo & Juan, **comb. nov.** ≡ *Ornithogalum chetikianum* Uysal, Ertugrul & Dural in Bot. J. Lin. Soc. 148: 501. 2005 [basion.]

19. *Ornithogalum* L., Sp. Pl.: 306. 1753 ≡ *O.* subgenus *Heliocharmos* Baker in J. Linn. Soc. (Bot.) 13: 258. 1872 ≡ *O.* section *Heliocharmos* (Baker) Engl., Nat. Pflanzenfam. [Engler & Prantl] 2, Abt. 5: 67. 1888 – Lectotype: *O. umbellatum* L. (cf. Stearn, 1983).

= *Celsia* Heist. ex Fabr., Enum. (ed. 2). [Fabr.]: 22. 1763, pro parte, nom. illeg. [non *Celsia* L., Sp. Pl.: 621. 1753; *Scrophulariaceae*] – Lectotype: *O. umbellatum* L.

Plants small to middle size. Bulb with brown or whitish membranous outer tunics, sometimes with sessile or pediculate bulbils. Leaves numerous, linear and tapering to lanceolate or oblong, sometimes not occurring with the flowers, glabrous or rarely ciliate, sometimes with a longitudinal white band. Inflorescence corymbose or racemose corymbose, a little longer than wide; pedicels erect-patent in flower and patent or sometimes deflexed in fruit; bracts large, lanceolate or ovate-lanceolate, membranous or papery; bracteoles absent. Flowers suberect, erect or patent, diurnal; tepals free, ovate-lanceolate, white with a wide longitudinal green band only visible by the abaxial side; filaments free and flat, lanceolate to tapering; ovary green, ovate or obovate and truncate at the apex, deeply trilobate, with six evident ribs; style white and filiform; stigma punctiform slightly trigonous and glandular. Capsule obovate or oblong, usually truncate at the apex, deeply trilobate with six evident ribs in section. Seeds globose, biseriate per locule, with sinuose and prominent reticulate testa.

*Chromosome number*:  $2n = 12, 14, 16, 18, 20, 22, 24, 26, 28, 32, 36, 45, 52, 54, 72, 90, 108$  (cf. Speta, 1998a).

*Number of species*: about 50 (cf. Speta, 1998a).

*Distribution*: Europe, south-west Asia (Middle East to Afghanistan), and northern Africa.

#### *Incertae sedis*

*Ornithogalum toxicarium* C.Archer & R.H.Archer in S. Afr. J. Bot. 65: 431. 1999.

This peculiar plant was described from karoo shrublands and dry grassland in South Africa and Namibia. Its peculiar floral, fruit and seed features do not match any of the accepted genera of *Ornithogaloideae*. Further studies, including molecular data, are needed to resolve the taxonomic position of this remarkable taxon. In the meantime, we prefer not to place it in the proposed arrangement.

#### SUPPLEMENTARY DATA

Supplementary data are available online at [www.aob.oxford-journals.org](http://www.aob.oxford-journals.org) and consist of the following tables. Table S1: Characters and character states for the morphological study. Table S2: Morphological data matrix. Table S3: GenBank

accession numbers for samples included in the phylogenetic analyses of the Hyacinthaceae, mainly the subfamily *Ornithogaloideae*.

#### ACKNOWLEDGEMENTS

This work was supported by the Ministerio de Educación y Ciencia (Spanish Government) (grant number AP2002-0214) and the Fundación Ramón Areces (Spain). We thank Laco Mucina (Curtin University of Technology, Perth) for his interesting biogeographical comments and corrections and additions to the early manuscript. We are grateful to John Manning (South African National Biodiversity Institute, Kirstenbosch) and Félix Forest (Jodrell Laboratory, Royal Botanic Gardens, Kew) for sharing their unpublished plastid sequences. M<sup>a</sup> Dolores Lledó (Jodrell Laboratory, Royal Botanic Gardens, Kew) helped with laboratory procedures. Katherine Challis (Royal Botanic Gardens, Kew) kindly supplied information of protologues of several taxa. Lorenzo Peruzzi (Università degli Studi di Pisa) and M<sup>a</sup> Montserrat Martínez-Ortega (Universidad de Salamanca) sent important samples for the phylogenetic analyses. Stephen L. Jury (University of Reading) sent pictures and vouchers for *B. amoena*. Nigel P. Barker (Department of Botany, Rhodes University, Grahamstown) and Tony P. Dold (Albany Museum, Schönland Herbarium, Grahamstown) provided valuable assistance with some South African genera. Two anonymous referees and the handling editor, Anne Brysting, made constructive criticisms that improved the text.

#### LITERATURE CITED

- Akaike H. 1974. A new look at the statistical model identification. *IEEE Transactions on Automatic Control* 19: 716–723.
- Alzate F, Mort ME, Ramirez M. 2009. Phylogenetic analyses of *Bomarea* (Alstroemeriaceae) based on combined analyses of nrDNA ITS, psbA-trnH, rpoB-trnC and matK sequences. *Taxon* 57: 853–862.
- APG II. 2002. An update of the Angiosperm Phylogeny Group classification for the orders and families of flowering plants: APG II. *Botanical Journal of the Linnean Society* 141: 399–436.
- APG III. 2009. An update of the Angiosperm Phylogeny Group Classification for the orders and families of flowering plants: APG III. *Botanical Journal of the Linnean Society* 161: 105–121.
- Archer C, Archer RH. 1999. A new species of *Ornithogalum* subgenus *Urophyllon* (Hyacinthaceae) from central South Africa and southern Namibia. *South African Journal of Botany* 65: 431–433.
- Baker JG. 1870. *Hyacinthus candicans* & *H. princeps*. In: Saunders WW, ed. *Refugium Botanicum* 3. London: John Van Voorst, 174–175.
- Baker JG. 1872. Revision of the genera and species of *Scilleae* and *Chlorogaleae*. *Journal of the Linnean Society, Botany* 13: 209–292.
- Baker JG. 1891. New or noteworthy plant. *Ornithogalum* (*Caruelia*) *Saundersiae* Baker, n. sp. *Gardener's Chronicle*, Ser. 3, 10: 452–453.
- Baker JG. 1897a. *Albuca*. In: Thiselton-Dyer WT, ed. *Flora Capensis* 6(3). London: Reeve & Co., 451–462.
- Baker JG. 1897b. *Ornithogalum*. In: Thiselton-Dyer WT, ed. *Flora Capensis* 6(3). London: Reeve & Co., 494–516.
- Baker JG. 1898. *Albuca*. In: Thiselton-Dyer WT, ed. *Flora of Tropical Africa* 7(3). London: Reeve & Co., 528–535.
- Baker JG. 1904. The genus *Albuca* in the Herbarium of the Albany Museum. *Records of the Albany Museum* 1: 89–94.
- Barfuss MHJ, Samuel R, Till W, Stuessy TF. 2005. Phylogenetic relationships in subfamily Tillandsioideae (Bromeliaceae) based on DNA sequences data from seven plastid regions. *American Journal of Botany* 92: 337–351.



- Cameron KM. 2004. Utility of plastid *psaB* gene sequences for investigating intrafamilial relationships within Orchidaceae. *Molecular Phylogenetics and Evolution* 31: 1157–1180.
- Chase MW, Reveal JL, Fay MF. 2009. A subfamilial classification for the expanded asparagalean families, Amaryllidaceae, Asparagaceae and Xanthorrhoeaceae. *Botanical Journal of the Linnean Society* 161: 132–136.
- Clegg MT, Zurawski G. 1992. Chloroplast DNA and the study of plant phylogeny: present status and future prospects. In: Soltis PS, Soltis DE, Doyle JJ. eds. *Molecular systematics of plants*. New York, NY: Chapman & Hall, 1–13.
- Creeth JM, Denborough MA. 1970. The use of equilibrium-density gradient methods for the preparation and characterization of bloodgroup specific glycoproteins. *Biochemical Journal* 117: 879–891.
- Cullen J. 1984. *Ornithogalum* L. In: Davis PH. ed. *Flora of Turkey and the East Aegean Islands*. Edinburgh: Edinburgh University Press, 227–245.
- Cullen J, Ratter JA. 1967. Taxonomic and cytological notes on Turkish *Ornithogalum*. *Notes from the Royal Botanic Garden, Edinburgh* 27: 293–339.
- Decaisne J. 1880. Note sur le *Galtonia*, nouveau genre de Liliacées de l'Afrique australe. *Flore des serres et des jardins de l'Europe* 23 (ser. 2, 13): 32–33.
- Devos N, Barker NP, Nordenstam B, Mucina L. 2009. A multilocus phylogeny of *Euryops* (Asteraceae, Senecioneae) augments support for the 'Cape to Cairo' hypothesis of floral migrations in Africa. *Taxon* 59: 57–67.
- Dold AP. 2003. The rediscovery of *Ornithogalum britteniae* (Hyacinthaceae) and an amendment to the description. *South African Journal of Botany* 69: 500–504.
- Douzery EJP, Pridgeon AM, Kores P, Linder HP, Kurzweil H, Chase MW. 1999. Molecular phylogenetics of Deseae (Orchidaceae): a contribution from nuclear ribosomal ITS sequences. *American Journal of Botany* 86: 887–899.
- Doyle JJ. 1992. Gene trees and species trees: molecular systematics as one-character taxonomy. *Systematic Botany* 17: 144–163.
- Doyle JJ, Doyle JL. 1987. A rapid DNA isolation procedure from small quantities of fresh leaf tissue. *Phytochemical Bulletin, Botanical Society of America* 19: 11–15.
- Durand T. 1890. Un nouveau genre de Liliacées (*Lindneria* Th. Dur. et Lubbers). *Bulletin de la Société Botanique de France* 36: CCXVI–CCXVII[and plate XVIII].
- Düßen OD, Sümbül H. 2002. A new *Ornithogalum* L. species (Liliaceae) from Turkey. *Israel Journal of Plant Sciences* 51: 75–77.
- Dyer RA. 1931. New species of *Ornithogalum* and *Albica* from Albany Division. *Records of the Albany Museum* 4: 111–114.
- Engler A. 1888. Liliaceae. In: Engler A, Prantl K. eds. *Die natürlichen Pflanzenfamilien* 2, 5. Leipzig: W. Engelmann, 10–91.
- Feinbrun N. 1941. The genus *Ornithogalum* in Palestine and neighbouring countries. *Palestine Journal of Botany* 2: 132–150.
- Feinbrun N. 1986. *Flora Palaestina*, Part 4. Jerusalem: The Israel Academy of Sciences and Humanities.
- Forrest LL, Jong K. 2004. Karyotype asymmetry in *Galtonia* and *Pseudogaltonia* (Hyacinthaceae). *Edinburgh Journal of Botany* 60: 569–579.
- Garbari F, Peruzzi L, Tornadore N. 2008. *Ornithogalum* L. (Hyacinthaceae Batsch) e generi correlati (Subfam. Ornithogaloideae Speta) in Italia. *Atti della Società Toscana di Scienze Naturali di Pisa. Memorie Serie B*, 114: 35–44.
- Gray SF. 1821. *Natural arrangement of British plants*, 2. London: Baldwin, Cradock & Joy.
- Guaglianone ER, Arroyo-Leuenberger S. 2002. The South American genus *Oziroë* (Hyacinthaceae-Oziroëoideae). *Darwiniana* 40: 61–76.
- Hammett KRW, Murray BG. 1993. On the polyploid origin of *Galtonia* 'Moonbeam'. *New Zealand Journal of Crop and Horticultural Science* 21: 279–281.
- Herrmann N. 2002. Biological flora of Central Europe: '*Ornithogalum angustifolium*' nom. prov., Syn. p.p. *O. orthophyllum* ssp. *kochii* (= *O. kochii* Parl., *O. gussonei* Ten.). *Flora* 197: 409–428.
- Heywood VH. 1980. *Dipcadi Medicus*. In: Tutin TG, et al eds. *Flora europaea*, Vol. 5. Cambridge: Cambridge University Press, 46.
- Hilliard OM, Burt BL. 1986. *Galtonia regalis*. *Notes from the Royal Botanic Garden, Edinburgh* 43: 369.
- Hilliard OM, Burt BL. 1988. A revision of *Galtonia* (Liliaceae). *Notes from the Royal Botanic Garden, Edinburgh* 45: 95–104.
- Holub J. 1976. New names in Phanerogamae 4. *Folia Geobotanica & Phytotaxonomica* 11: 75–85.
- del Hoyo A, Pedrola-Monfort J. 2006. Missing links between disjunct populations of *Androcymbium* (Colchicaceae) in Africa using chloroplast DNA noncoding sequences. *Aliso* 22: 606–618.
- Hutchinson J. 1934. *Families of flowering plants*. 2. *Monocotyledons*. London: Macmillan.
- IPNI. 2010. *The International Plant Names Index*. Published on the Internet <http://www.ipni.org> [http](http://www.ipni.org). Kew: Royal Botanic Gardens [accessed March 2010].
- Jessop JP. 1975. Studies in the bulbous Liliaceae in South Africa. 5. Seed surface characters and generic grouping. *Journal of South African Botany* 41(2): 67–85.
- Jones K, Smith JB. 1967. The chromosomes of the Liliaceae. I. The karyotypes of twenty-five tropical species. *Kew Bulletin* 21: 31–38.
- Jürgens N. 1997. Floristic biodiversity and history of African arid regions. *Biodiversity and Conservation* 6: 495–514.
- Kuntze O. 1886. *Plantae Pechuelianae hereroenses*. *Jahrbuch des Königlichen Botanischen Gartens und des Botanischen Museums zu Berlin* 4: 260–275.
- Lebatha P, Buys MH, Stedje B. 2006. *Ledebouria*, *Resnova* and *Drimiopsis*: a tale of three genera. *Taxon* 55: 643–652.
- Leighton FM. 1944. A revision of the South African species of *Ornithogalum*. *Journal of South African Botany* 10: 82–122.
- Leighton FM. 1945. A revision of the South African species of *Ornithogalum*. *Journal of South African Botany* 11: 138–192.
- Leighton FM, Salter TM. 1944. *Plantae novae africanae*, series 22. *Journal of South African Botany* 10: 55–58.
- Lewis GJ. 1952. *Plantae novae Africanae*. *Annals of the South African Museum* 40: 6–14.
- Lihová J, Fuertes-Aguilar J, Marhold K, Nieto-Feliner G. 2004. Origin of the disjunct tetraploid *Cardamine amporitana* (Brassicaceae) assessed with nuclear and chloroplast DNA sequences data. *American Journal of Botany* 91: 1231–1242.
- Linder HP, Lovett J, Mutke JM, et al. 2005. A numerical re-evaluation of the sub-Saharan phytocoria of mainland Africa. *Biologische Skrifter* 55: 229–252.
- Lindley J. 1816. *Ornithogalum prasinum* Ker Gawl. *Botanical Register* 2: 158.
- Linnaeus C. 1753. *Species plantarum*. Stockholm: Salvius.
- Linnaeus C. 1762. *Species plantarum*. ed. 2. Stockholm: Salvius.
- Link JHF. 1829. *Handbuch zur Erkennung der Nutzbarsten und am Häufigsten Vorkommenden Gewächse*, 1. Berlin: S. J. Josephy.
- Lledó MD, Crespo MB, Cameron KM, Fay MF, Chase MW. 1998. Systematics of Plumbaginaceae based upon cladistic analysis of *rbcl* sequence data. *Systematic Botany* 23: 21–29.
- Maddison DR, Maddison WP. 2005. *MacClade 4. Analysis of phylogeny and character evolution*. Sunderland, MA: Sinauer Associates.
- Maire R. 1926. Contributions à l'étude de la Flore de l'Afrique du nord. *Bulletin de la Société d'Histoire Naturelle de l'Afrique du Nord* 17: 104–126.
- Maire R. 1958. *Flore de l'Afrique du Nord*, 5. Paris: P. Lechevalier.
- Manning JC, Goldblatt P, Anderson F. 1999. *Albica clanwilliamigloria*. *Flowering Plants of Africa* 56: 8–12.
- Manning JC, Goldblatt P, Snijman D. 2002. *The color encyclopedia of Cape bulbs*. Portland, OR: Timber Press.
- Manning JC, Goldblatt P, Fay MF. 2004. A revised generic synopsis of Hyacinthaceae in Sub-Saharan Africa, based on molecular evidence, including new combinations and the new tribe *Pseudoprosperaeae*. *Edinburgh Journal of Botany* 60: 533–568.
- Manning JC, Martínez-Azorín M, Crespo MB. 2007. A revision of *Ornithogalum* subgenus *Aspasia* section *Aspasia*, the chinchinchees (Hyacinthaceae). *Bothalia* 37: 133–164.
- Manning JC, Forest F, Devey DS, Fay MF, Goldblatt P. 2009a. A molecular phylogeny and a revised classification of Ornithogaloideae (Hyacinthaceae) based on an analysis of four plastid DNA regions. *Taxon* 58: 77–107.
- Manning JC, Goldblatt P, Williamson G. 2009b. *Pseudogaltonia liliiflora* (Ornithogaloideae), a new species from the Richtersveld, Northern Cape. *Bothalia* 39: 229–231.

- Martínez-Azorín M, Crespo MB, Spencer M. 2006.** Typification of names of taxa in *Ornithogalum* L. subg. *Cathissa* (Salisb.) Baker (Hyacinthaceae). *Taxon* **55**: 1014–1018.
- Martínez-Azorín M, Crespo MB, Juan A. 2007.** Taxonomic revision of *Ornithogalum* subg. *Cathissa* (Salisb.) Baker (Hyacinthaceae). *Anales del Jardín Botánico de Madrid* **64**: 7–25.
- Martínez-Azorín M, Crespo MB, Juan A. 2009.** Nomenclature and taxonomy of *Ornithogalum divergens* Boreau (Hyacinthaceae) and related taxa of the polyploidy complex of *Ornithogalum umbellatum* L. *Candollea* **64**: 163–169.
- Martínez-Azorín M, Crespo MB, Juan A. 2010a.** Taxonomic revision of *Ornithogalum* subg. *Beryllis* (Hyacinthaceae) in the Iberian Peninsula and the Balearic Islands. *Belgian Journal of Botany* **142**: 139–161.
- Martínez-Azorín M, Crespo MB, Juan A. 2010b.** Taxonomic revision of *Ornithogalum* subg. *Ornithogalum* (Hyacinthaceae) in the Iberian Peninsula and the Balearic Islands. *Plant Systematics and Evolution* **289**: 181–211.
- McNeill J, Barrie FR, Burdet HM, et al. eds. 2006.** *International Code of Botanical Nomenclature (Vienna Code)*. Adopted by the Seventeenth International Botanical Congress Vienna, Austria, July 2005. Königstein: Koeltz Scientific Books.
- Medikus FK. 1790.** Von zwei neuen Pflanzengeschlechtern, deren Hauptcharaktere in dem Wurzelbaue liegen. *Historia et Commentationes Academiae Electoralis Scientiarum et Elegantiorum Litterarum Theodoro-Palatinae* **6**: 369–373.
- Moret J, Couderc H, Bari A, Delarue Y. 1990.** Micromorphology of seeds of *Ornithogalum* (Hyacinthaceae) in North Africa. *Nordic Journal of Botany* **9**: 461–468.
- Müller-Doblies U. 1994.** Enumeratio *Albucarum* (Hyacinthaceae) Austro-Africanarum adhuc cognitarum. 1. Subgenus *Albuca*. *Feddes Repertorium* **105**: 365–368.
- Müller-Doblies U. 1995.** Enumeratio *Albucarum* (Hyacinthaceae) Austro-Africanarum adhuc cognitarum. 2. Subgenus *Falconera* (Salisb.) Baker emend. U.M.-D. 1987. *Feddes Repertorium* **106**: 353–370.
- Müller-Doblies U. 2006.** Enumeratio *Albucarum* (Hyacinthaceae) Austro-Africanarum adhuc cognitarum. 3. Additions and additional notes to *Albuca* subgenus *Falconera* and *A.* subgenus *Albuca*. *Feddes Repertorium* **117**: 96–138.
- Müller-Doblies U, Müller-Doblies D. 1996.** Revisionula incompleta *Ornithogalorum* Austro-Africanorum (Hyacinthaceae). *Feddes Repertorium* **107**: 361–548.
- Neves JB. 1962.** Dados cariológicos sobre algumas espécies africanas de *Ornithogalum* L. *Boletim da Sociedade Broteriana*, Sér. 2, **36**: 151–173.
- Nordal I, Stedje B. 1993.** The *Ornithogalum tenuifolium* complex (Hyacinthaceae) in Zimbabwe. *Kirkia* **14**: 12–18.
- Nylander JAA. 2004.** Bayesian phylogenetics and the evolution of gall wasps. *Acta Universitatis Uppsaliensis. Comprehensive Summaries of Uppsala Dissertations from the Faculty of Science and Technology* **937**.
- Obermeyer AA. 1964.** The South African species of *Dipcadi*. *Bothalia* **8**: 117–137.
- Obermeyer AA. 1978.** *Ornithogalum*: a revision of the southern African species. *Bothalia* **12**: 323–376.
- Palmer JD, Jansen RK, Michaels HJ, Chase MW, Manhart JR. 1988.** Chloroplast DNA variation and plant phylogeny. *Annals of the Missouri Botanical Garden* **75**: 1180–1260.
- Parlatore F. 1854.** *Nuovi generi e nuove specie di piante monocotiledoni*. Florence: Le Monnier.
- Pastor J. 1987.** *Ornithogalum* L. In: Valdés B et al. eds. *Flora vascular de Andalucía occidental*, Vol. 3. Barcelona: Ketres, 435–439.
- Peruzzi L, Caparelli KF, Cesca G. 2007.** Contribution to the systematic knowledge of the genus *Ornithogalum* L. (Hyacinthaceae): morpho-anatomical variability of the leaves among different taxa. *Bocconea* **21**: 257–265.
- Peterson A, John H, Koch E, Peterson J. 2004.** A molecular phylogeny of the genus *Gagea* (Liliaceae) in Germany inferred from non-coding chloroplast and nuclear DNA 11 sequences. *Plant Systematics and Evolution* **245**: 145–162.
- Peterson A, Harpke D, Peruzzi L, Levichev IG, Tison JM, Peterson J. 2009.** Hybridization drives speciation in *Gagea* (Liliaceae). *Plant Systematics and Evolution* **278**(3–4): 133–148.
- Pfossor M, Speta F. 1999.** Phylogenetics of Hyacinthaceae based on plastid DNA sequences. *Annals of the Missouri Botanical Garden* **86**: 852–875.
- Phillips E. 1926.** *Albuca convoluta*. *Flowering Plants of South Africa* **6**: 225.
- Phillips E. 1935.** *Pseudogaltonia clavata*. *Flowering Plants of South Africa* **15**: 580.
- Pires JC. 2000.** *Biosystematics and molecular phylogenetics of Brodiaea (Themidaceae) and related lilioid monocots*. PhD Dissertation. University of Wisconsin-Madison.
- Pires JC, Sytsma KJ. 2002.** A phylogenetic evaluation of a biosystematic framework: *Brodiaea* and related petaloid monocots (Themidaceae). *American Journal of Botany* **89**: 1342–1359.
- Pirie MD, Vargas MPB, Botermans M, Bakker FT, Chatrou LW. 2007.** Ancient paralogy in the cpDNA *trnL-F* region in Annonaceae: implications for plant molecular systematics. *American Journal of Botany* **94**: 1003–1016.
- Rafinesque CS. 1837.** *Flora Telluriana* 2 & 3. Philadelphia, PA: H. Probasco.
- Ravenna P. 2007.** *Loncomelos iraelense*, a new species of Hyacinthaceae. *Onira* **11**: 23–24.
- Rechinger KH. 1990.** *Ornithogalum*. In: Rechinger KH, et al eds. *Flora iranica, Liliaceae* 2. Graz: Akademische Druck, 119–132.
- Reichenbach L. 1830.** *Flora germanica excursoria*, 1. Leipzig: C. Cnobloch.
- Riddles L, Condy G. 2001.** *Galtonia regalis*. *Flowering Plants of South Africa* **57**: 30–32.
- Rieseberg LH. 1991.** Homoploid reticulate evolution in *Helianthus* (Asteraceae): evidence from ribosomal genes. *American Journal of Botany* **78**: 1218–1237.
- Rieseberg LH, Soltis DE. 1991.** Phylogenetic consequences of cytoplasmic gene flow in plants. *Evolutionary Trends in Plants* **5**: 65–84.
- Rieseberg LH, Soltis DE, Palmer JD. 1988.** A re-examination of introgression between *Helianthus annuus* and *H. bolanderi* (Compositae). *Evolution* **42**: 227–238.
- Ronquist F, Huelsenbeck JP. 2003.** MrBayes 3: Bayesian phylogenetic inference under mixed models. *Bioinformatics* **19**: 1572–1574.
- Salamin N, Chase MW, Hodkinson TR, Savolainen V. 2003.** Assessing internal support with large phylogenetic DNA matrices. *Molecular Phylogenetics and Evolution* **27**: 528–539.
- Salisbury RA. 1866.** *The genera of plants: a fragment containing part of Liriogamae*. London: John van Voorst.
- Schönland S. 1912.** *Neopatersonia*, a new genus of Liliaceae. *Record of the Albany Museum* **2**: 251–253.
- Shaw J, Lickey EB, Beck JT, et al. 2005.** The tortoise and the hare II: relative utility of 21 noncoding chloroplast DNA sequences for phylogenetic analysis. *American Journal of Botany* **92**: 142–166.
- Smith RL, Sytsma KJ. 1990.** Evolution of *Populus nigra* (sect. *Aigeiros*): introgressive hybridization and the chloroplast contribution of *Populus alba* (sect. *Populus*). *American Journal of Botany* **77**: 1176–1187.
- Speta F. 1998a.** Hyacinthaceae. In: Kubitzki K. ed. *The families and genera of vascular plants* 3. Berlin: Springer, 261–285.
- Speta F. 1998b.** Systematische Analyse der Gattung *Scilla* L. s.l. (Hyacinthaceae). *Phyton (Horn)* **38**: 1–141.
- Speta F. 2000.** Beitrag zur Kenntnis von *Ornithogalum* L. (Hyacinthaceae) in Oberösterreich. *Beiträge zur Naturkunde Oberösterreichs* **9**: 743–792.
- Speta F. 2001.** Die Echte und die Falsche Meerzwiebel: *Charybdis* Speta und *Stellarioides* Medicus (Hyacinthaceae), mit Neubeschreibungen und Neukombinationen im Anhang. *Stappia* **75**: 139–176.
- Speta F. 2006.** Die Gattung *Loncomelos* Raf. (Hyacinthaceae – Ornithogaloideae), vorgestellt anhand dreier neuer Arten. *Phyton (Horn)* **46**: 1–25.
- Spies P. 2004.** *Phylogenetic relationships of the genus Lachenalia with other related liliaceous taxa*. MSc Thesis. University of the Free State, South Africa.
- Stearn WT. 1983.** The Linnaean species of *Ornithogalum* (Liliaceae). *Annales Musei Goulandris* **6**: 139–170.
- Stedje B. 1989.** Chromosome evolution within the *Ornithogalum tenuifolium* complex (Hyacinthaceae), with special emphasis on the evolution of bimodal karyotypes. *Plant Systematics and Evolution* **166**: 79–89.
- Stedje B. 2001a.** Generic delimitation of Hyacinthaceae, with special emphasis on sub-Saharan genera. *Systematics and Geography of Plants* **71**: 449–454.
- Stedje B. 2001b.** The generic delimitation within Hyacinthaceae, a comment on works by F. Speta. *Bothalia* **31**: 192–195.
- Swofford DL. 2002.** *PAUP, version 4-0b10 for Macintosh*. Sunderland, MA: Sinauer Associates.
- Sytsma KJ, Schaal BA. 1985.** Phylogenetics of the *Lisianthus skinneri* (Gentianaceae) species complex in Panama utilizing DNA restriction fragments analysis. *Evolution* **39**: 594–608.

- Taberlet P, Gielly L, Pautout G, Bouvet J. 1991.** Universal primers for amplification of three non-coding regions of chloroplast DNA. *Plant Molecular Biology* **17**: 1105–1109.
- Thiers B. 2009.** [continuously updated]. *Index Herbariorum: a global directory of public herbaria and associated staff*. New York Botanical Garden's Virtual Herbarium. <http://sweetgum.nybg.org/ih/>.
- Thulin M. 1994.** Aspects of disjunct distributions and endemism in the arid parts of the Horn of Africa, particularly Somalia. In: Seyani JH, Chikuni AC. eds. *Proceedings of the XIIIth Plenary meeting of the AETFAT, Zomba, Malawi, 2–11 April 1991*. Zomba: National Herbarium and Botanic Gardens of Malawi, 1105–1119.
- Uysal T, Ertugrul K, Dural H. 2005.** A new species of *Ornithogalum* (Liliaceae) from South Anatolia, Turkey. *Botanical Journal of the Linnean Society* **148**: 501–504.
- Valdés B. 1987.** *Dipcadi* Medicus. In: Valdés B, et al eds. *Flora Vascular de Andalucía Occidental*. **3**. Barcelona: Ketres, 444–445.
- Van Jaarsveld E, Van Wyk AE, Blake T. 2007.** *Ornithogalum cremnophilum*. *Flowering Plants of Africa* **60**: 8–13.
- Verdcourt B. 1969.** The arid corridor between the north-eastern and south-western areas of Africa. *Paleoecology of Africa* **4**: 140–144.
- Verdoorn IC. 1955.** *Galtonia viridiflora*. *Flowering Plants of Africa* **30**: 1118.
- Vosa CG. 1980.** Chromosome analysis and heterochromatin recognition in the southern african species of *Ornithogalum*: 1. *Ornithogalum seineri* (Engl. & Kr.) Oberm. *Journal of South African Botany* **46**: 445–450.
- Wallace RS, Jansen RK. 1990.** Systematic implications of chloroplast DNA variation in the genus *Microseris* (Asteraceae: Lactuceae). *Systematic Botany* **15**: 606–616.
- Wendel JF, Stewart JM, Rettig JW. 1991.** Molecular evidence for homoploid reticulate evolution among Australian species of *Gossypium*. *Evolution* **45**: 694–711.
- Wetschnig W, Knirsch W, Ali SS, Pfosser M. 2007.** Systematic position of three little known and frequently misplaced species of Hyacinthaceae from Madagascar. *Phyton (Horn)* **47**: 321–337.
- White TJ, Bruns T, Lee S, Taylor JW. 1990.** Amplification and direct sequencing of fungal ribosomal RNA genes for phylogenetics. In: Innis MA, Gelfand DH, Sninsky JJ, White TJ. eds. *PCR protocols: a guide to methods and applications*. New York, NY: Academic Press, 315–322.
- Wittmann H. 1985.** Beitrag zur Systematik der *Ornithogalum* Arten mit verlängert-traubiger Infloreszenz. *Stapfia* **13**: 1–117.
- Zahariadi C. 1965.** Sous-genres et sections mésogéens du genre *Ornithogalum* et la valeur comparative de leurs caractères différentiels. *Revue Roumaine de Biologie. Serie Botanique* **10**: 271–291.
- Zahariadi C. 1980.** *Ornithogalum* L. In: Tutin TG, Heywood VH, Burges NA, et al eds. *Flora Europaea*. **5**. Cambridge: Cambridge University Press, 35–40.
- Zarrei M, Wilkin P, Fay MF, Ingrouille MJ, Zarre S, Chase MW. 2009.** Molecular systematics of *Gagea* and *Lloydia* (Liliaceae; Liliales): implications of analyses of nuclear ribosomal and plastid DNA sequences for infrageneric classification. *Annals of Botany* **104**: 125–142.
